# Supplementary material for: Prescribing Response Strategies to Manage Customer Opinions: A Stochastic Differential Equation Approach
Source: Atypon-hosted journal article supplement (doi:10.1287/isre.2018.0805), 2019-04-26
Supplement: isre.2018.0805.sm1.pdf [file isre.2018.0805.sm1.pdf]

# Online Appendices to Prescribing Response Strategies to Manage Customer Opinions: A Stochastic Differential Equation Approach

Mingwen Yang<sup>1</sup>, Zhiqiang (Eric) Zheng<sup>2</sup>, Vijay Mookerjee<sup>2</sup>

<sup>1</sup>Michael G. Foster School of Business, University of Washington

<sup>2</sup>Naveen Jindal School of Management, University of Texas at Dallas

## 1 Text Analysis

### Sentiment Analysis

This part describes the procedure of our sentiment analysis for labeling reviews. First, we conduct word segmentation and part-of-speech tagging to convert the unstructured textual data into individual words or phrases.<sup>1</sup> Next, the Naive Bayes method is used to train a classifier on the polarity of these words or phrases by manually labeling each review text from training set as positive or negative. The training set is composed of a large pool of labeled online reviews. Table 1-1 lists some examples of positive and negative words from the review text. Finally, using this trained classifier, we calculate the sentiment score (the probability of a positive sentiment) for each review text to classify it as negative or positive. We validate our approach by comparing the polarity of reviews derived from our sentiment analysis with those derived directly from the review rating. When using the rating as the basis to derive polarity, we consider a rating as negative if the rating is below the mean, and positive otherwise. Table 1-2 compares the agreement (the number of counts) between the labels derived from these two methods. We see that the review polarity obtained from sentiment analysis is generally consistent with that derived from the rating, with relatively low false positive and false negative rates, compared to the state-of-the-art sentiment mining tools that typically achieve about 70% of accuracy (Liu 2015). We further conduct a Chi-squared Goodness-Of-Fit Test that results in a chi-square statistic of 1.79 with a p-value 0.18. Therefore, we cannot reject the null hypothesis and hence the polarities defined from review ratings and text sentiments are statistically the same.

Table 1-1: Example of Positive and Negative Words

| Sentiment | Words                                                                                                                                            |
|-----------|--------------------------------------------------------------------------------------------------------------------------------------------------|
| Positive  | timely, good, clean, happy, friendly, best, tasty, reliable, affordable<br>satisfied, lucky, beautiful, welcomed, enjoy, responsible, patiently  |
| Negative  | wasting, chaotic, yelling, noisy, rubbish, snobbish, inefficient, force<br>disappointed, unfortunately, awkward, busy, failed, inconvenient, but |

### Machine versus Human Generated Response

We identify machine-generated responses as those that follow a standard template (regardless of the nature of the complaint). For example, to respond to negative customer reviews, a machine-generated response reads something like “Dear Customer, thanks for your review. We apologize

<sup>1</sup>These steps were implemented using modules from the Institute of Computing Technology, Chinese Lexical Analysis System (ICTCLAS), a popular Chinese lexical analyzer with a word segmentation accuracy 98.45%.

Table 1-2: Comparison of Review Polarity defined by Rating versus Text Sentiment

|                |          | Rating   |          |        |
|----------------|----------|----------|----------|--------|
|                |          | Positive | Negative | Total  |
| Text Sentiment | Positive | 33,204   | 9,890    | 43,094 |
|                | Negative | 10,043   | 8,721    | 18,764 |
|                | Total    | 43,247   | 18,611   | 61,858 |

for any inconvenience in your trip. We will try our best to improve our service. Hope you continue supporting us. Thanks." To respond to positive customer reviews, it reads something like "Dear Customer, thanks for your review. We are happy to know you have a good experience with our product or service. Hope you continue supporting us. Thanks."

To label machine-generated responses, we pre-defined a standard template-type of response for positive and negative reviews respectively, and then calculated the similarity score between each response text with the positive and negative template response texts using the term frequency-inverse document frequency (TF-IDF) value (Manning et al. 2008). Then we choose the maximum TF-IDF value as the similarity score. We label responses with high similarity score (with similarity score greater than 0.6) as machine-generated responses. After labelling, we manually went over each response to make sure customized (or human-generated) responses were not mis-labelled as machine-generated.

Based on the above scheme, we find that when the current review is negative, most of the responses are customized (76%). This makes sense because when customers report a serious problem with a tour, a standard, template-like reply normally does not help address the complaint. Prior research shows that tailored (customized) management responses are effective in this regard Wang and Chaudhry (2018). Thus, we have focused on customized responses since these responses are costly to firm, but they are necessary and effective.

### Content Similarity between Review Texts

In this part, we first describe how the content similarity between negative reviews (in Section 4.2) is calculated. Suppose a review does not receive a response, we first extract its next and prior  $n$  (window size) reviews. Then we calculate a cosine similarity score between those negative review texts before and after the (focal) review (tuple) within the window size. The cosine similarity score is calculated based on the TF-IDF value. We repeat the above calculation for each review without a response (control group), and then compute the average similarity score. Following the same calculation, we then compute the average similarity score between negative review texts before and after reviews with a response (treatment group). We have used window sizes of 10 and 20 in the analysis. We then conduct t-test to empirically verify whether the mean values (similarity scores) of the treatment and control group are statistically different or not for each window size.

The similarity between positive reviews (in Section 8.1) is calculated following the same scheme.

## 2 Details of Quasi-Experiment

We use Propensity Score Matching (PSM) to first identify similar tours based on observed tour characteristics. The tour characteristics extracted from data include length of travel (with unit of days, Length), flexible length of travel or not (dummy, Flexibility), departure city (Departure), destination (Destination), travel agent (i.e. the travel company, Agent), transportation (including a flight or not, Transportation), travel type (e.g. with a tour guide or not, Type), hotel star level (Hotel), the average price of the tour (Price), and tour age (Age, the number of days since the first customer review arrived on Ctrip.com to December 31th, 2014, and it is log transformed). All these characteristics identified above are exogenous (because they predate the response and are very unlikely that they are systematically co-determined with the firm's response decisions), which is a critical condition for PSM to work well.

The treatment in our setting is firm responses. However, when matching tours, one concern is that tours never respond to any reviews are systematically different from those that have done so. Therefore, we attempt to match among the tours which have at least responded to reviews once. We focus on the three-month period after the first response in each tour. Tours without (with) responses in this period are defined as control (treatment) group. This design guarantees a high degree of similarity between the treatment and control groups since both provided responses. We then run a Probit model (as the first stage) to match the treated and control tours based on their predicted propensity scores. The Probit model results are shown in Table 2-1. We use the nearest neighbor (NN) matching with replacement. We further check whether the covariates of the matched treated and control tours are balanced. Table 2-2 shows after matching the tour characteristics are comparable. The PSM yields 68 tours in the treatment group and 49 in the control group (a few control tours are used as the matching firm multiple times).

Table 2-1: Probit Regression of Responding to Reviews

| Treatment      | Coef.   | Std. Err. | z-value | p-value |
|----------------|---------|-----------|---------|---------|
| Length         | 0.189   | 0.215     | 0.880   | 0.379   |
| Flexibility    | -0.265  | 0.716     | -0.370  | 0.711   |
| Departure      | -0.732  | 0.682     | -1.070  | 0.283   |
| Destination    | -0.051  | 0.310     | -0.170  | 0.869   |
| Agent          | -1.716  | 6.764     | -0.250  | 0.800   |
| Transportation | 1.058   | 0.677     | 1.560   | 0.118   |
| Type           | -0.424  | 0.381     | -1.110  | 0.265   |
| Hotel          | -0.214  | 0.269     | -0.800  | 0.426   |
| Price          | -0.001  | 0.000     | -1.770  | 0.077   |
| Age            | -2.367  | 0.996     | -2.380  | 0.017   |
| Intercept      | -65.661 | 18.757    | -3.500  | 0.000   |
| Number of obs  | 117     |           |         |         |
| LR chi2(11)    | 89.760  |           |         |         |
| Prob >chi2     | 0.000   |           |         |         |
| Log likelihood | -34.670 |           |         |         |

Table 2-2: Balance Check Before and After Matching

|                | Mean Difference |                | p-value from t-test |                |
|----------------|-----------------|----------------|---------------------|----------------|
|                | Before Matching | After Matching | Before Matching     | After Matching |
| Length         | -0.124          | 1.346          | 0.398               | 0.115          |
| Flexibility    | 0.179           | -0.206         | 0.027               | 0.205          |
| Departure      | -0.137          | 0.059          | 0.061               | 0.398          |
| Destination    | -0.016          | 0.397          | 0.456               | 0.188          |
| Agent          | 0.026           | -0.015         | 0.191               | 0.160          |
| Transportation | 0.042           | 0.191          | 0.327               | 0.231          |
| Type           | 0.127           | -0.926         | 0.295               | 0.106          |
| Hotel          | -0.550          | 1.072          | 0.040               | 0.156          |
| Price          | -377.056        | 553.162        | 0.099               | 0.194          |
| Age            | -0.146          | 0.108          | 0.000               | 0.208          |

For each matched pair, let  $i$  index a tour,  $j$  index a matched pair, and  $t$  index the period.  $Rating_{i,j,t}$  is the average review ratings for tour  $i$  in pair  $j$  at period  $t$ .  $Treatment_{i,j}$  is a dummy variable with 1 representing a tour in the treatment group and 0 in the control group.  $Period_{i,j,t}$  is a dummy variable representing the period before (with value 0) or after (with value 1) the first response in a tour.  $\delta_j$  captures the pair-level fixed effect, and  $\epsilon_{i,j,t}$  is the error term. Equation (2-1) specifies the difference in difference (DID) econometric estimation model to study the relationship

between responses and future review ratings. Using equation (2-1), we examine the treatment effect of management response on future review ratings.

$$Rating_{i,j,t} = \beta_0 + \beta_1 Treatment_{i,j} * Period_{i,j,t} + \beta_2 Treatment_{i,j} + \beta_3 Period_{i,j,t} + \epsilon_{i,j,t} \quad (2-1)$$

Table 2-3 provides the estimation results. The estimated coefficient of interest corresponding to the treatment effect ( $\beta_1$ ) is positive and statistically significant, suggesting a positive effect of firm response on review ratings. However, there is no significant difference on ratings between the treatment and control group in the before-response period. The control group exhibits a negative trend on rating from the before-response to the after-response period.

Table 2-3: Results of DID in combination with PSM

| $Rating_{i,j,t}$                   | Coef.  | Std. Err. | t-value | p-value |
|------------------------------------|--------|-----------|---------|---------|
| <i>Intercept</i>                   | 4.636  | 0.104     | 44.720  | 0.000   |
| $Treatment_{i,j} * Period_{i,j,t}$ | 0.139  | 0.049     | 2.810   | 0.005   |
| $Treatment_{i,j}$                  | 0.016  | 0.035     | 0.450   | 0.654   |
| $Period_{i,j,t}$                   | -0.065 | 0.035     | -1.850  | 0.065   |
| Pair-level Fixed Effect            | Yes    |           |         |         |
| Number of obs                      | 272    |           |         |         |
| F (70, 201)                        | 1.870  |           |         |         |
| Prob >F                            | 0.000  |           |         |         |
| R-squared                          | 0.395  |           |         |         |

### 3 Initial Value Estimation

To run the Maximum Likelihood Estimation (MLE), we need to provide good initial values for quick convergence. It is common to use OLS to obtain initial parameter estimates, but for our problem simply applying OLS is not able to determine the initial values of  $\alpha$ ,  $\rho$ ,  $\beta$ , and  $\sigma$  simultaneously, which we will elaborate later. Therefore we determine the initial values of the estimators by utilizing some of the specific characteristics of our data.

We first infer the review arrival rate  $\lambda$  and the negative review probability  $p$  directly from the data. A closer examination of the probability density function of  $y_t$  reveals that its log-likelihood function is maximized over the compounds  $k_1$  and  $k_3$ . To exactly identify the optimal value of  $\hat{\theta}$ , it is necessary to further decompose the optimal values of  $\hat{k}_1$  and  $\hat{k}_3$ . Notice that  $k_1 k_3 = b\beta p\lambda = 5\beta p\lambda$ , and the term  $\beta p\lambda$ , always appears as a whole. To separate  $\beta$  out, we can first estimate  $\lambda$  and  $p$  from the data directly, and then solve for  $\beta$  from the equation  $k_1 k_3 = 5\beta p\lambda$ .

After estimating  $\beta$ ,  $p$ , and  $\lambda$ , we compute the estimated value  $\alpha + \rho(1 - p)\lambda$  as a whole by solving the equation  $k_1 = \alpha + \rho(1 - p)\lambda + \beta p\lambda$ . However, knowing the value of the expression  $\alpha + \rho(1 - p)\lambda$  still does not inform us whether an increased consumers' perception of quality (review rating) is due to the firm's control activity or due to the arrival of positive reviews. We propose the method to separate these two effects as follows.

We observe that specific to our data, many firms initially do not respond to reviews ( $\alpha = 0$ , in this period), and then begin to respond ( $\alpha > 0$ , after this period). Thus each tour can be split into two periods: pre-period (no-response period) where response is not allowed by the platform or adopted by the firm and post-period (after-no-response period) that is after the first response.<sup>2</sup> For these tours, we run MLE on the pre-period and are able to estimate  $\rho$  (boost parameter) using the data in pre-period where there were no responses.<sup>3</sup> Then using the data from post-period, we are able to recover the control parameter  $\alpha$  by plugging in the estimated  $\rho$  and  $\beta$  in the previous

<sup>2</sup>The pre-period (at the very beginning of the data generation process) expunges any possible impact from firm response.

<sup>3</sup>To run MLE on the pre-period (post-period) data, the initial value of  $\rho$  and  $\beta$  ( $\alpha$  and  $\sigma$ ) are obtained using OLS.

step. This is how the initial values  $\alpha_0$ ,  $\rho_0$ ,  $\beta_0$ , and  $\sigma_0$  are generated. To summarize, the estimation procedure for the initial values (separately carried out for each tour) is described as:

1. Estimate the review arrival rate  $\lambda$  and the probability of negative reviews  $p$  from the pre-period.
2. Plugging  $\hat{\lambda}$  and  $\hat{p}$ , estimate the boost parameter  $\rho_0$  (by setting  $\alpha = 0$ ) and damage parameter  $\beta_0$  using the data in the pre-period.
3. Plugging  $\rho_0$ ,  $\beta_0$ ,  $\hat{\lambda}$ , and  $\hat{p}$ , estimate the control parameter  $\alpha_0$ , and the magnitude of the random component  $\sigma_0$  using the data in the post-period.

Using these initial values  $(\alpha_0, \rho_0, \beta_0, \sigma_0)$ , we maximize the log-likelihood over  $\alpha$ ,  $\rho$ ,  $\beta$ , and  $\sigma$ , and get the maximum likelihood estimators of the parameters.

Lastly, we would like to clarify that regarding to the generation of negative reviews, our SDE model allows the probability (proportion) of negative reviews ( $p$ ) to change over time and vary under different response strategies. As described above,  $p$  is estimated from an initial period where no responses occur. This value of  $p$  is assumed to be constant, which is reasonable since there were no responses made by management during this period. We then use this value of  $p$  to estimate the management response strategy ( $\alpha$ ) in the portion of the data where the responses are seen to occur. During this period, the actual value of the probability of negative review (say  $p'$ ) can be different from the value during the no-response period. If the goal is to estimate this value of  $p'$ , then we would need to absorb the effect of the management response into  $p'$ . This value of  $p'$  might indeed be different (typically lower) from  $p$ .

Besides, response to a positive (negative) review affects how that review is perceived by other customers or reviewers. In other words, responses have an indirect effect through reviews. Our model has the control term  $\alpha(b - x_t)$  in an equation where the variables  $\lambda$  and  $p$  are independent of  $\alpha$ , i.e., these variables are the arrival rate and probability of a negative review in the absence of responses. We inferred  $\lambda$  and  $p$  in the initial part of the data where there were no responses. Once responding begins, we expect  $\lambda$  and  $p$  to change according to:

$$\mathbb{E}(dx_t) = (\lambda(1 - p)\rho(b - x_t) - \lambda p \beta x_t + \alpha(b - x_t))dt = (\lambda'(1 - p')\rho(b - x_t) - \lambda' p' \beta x_t)dt.$$

Thus, the arrival rate and the probability of negative reviews appearing will change as a result of the indirect (moderating) effect of firm response.

## 4 Detailed Results by Tour

In this appendix, we present the detailed breakdown results tour by tour. Table 4-1 shows the estimation results for the rest 107 tours. The first half of Table 4-2 reports the steady state means estimated from SDE, ARMA, GARCH, MA, and ES, as well as the observed means inferred from the data. The second half of Table 4-2 presents the in-sample RMSE for all the models considered for each tour. Table 4-3 shows the in-sample MAE and SMAPE of all the methods.

With regard to the out-of-sample predictive performance, Table 4-4, 4-5, and 4-6 present the RMSE, MAE, and SMAPE of all the 117 tours in terms of long-term and short-term out-of-sample prediction.

To summarize, the SDE method is superior or comparable to all the benchmark methods, regardless of predictive performance metrics considered. However, it is the only method that can be applied in a prescriptive fashion.

## 5 Additional Robustness Checks

### Different window size of the state variable

Instead of using the first two pages of reviews, we examine an alternative window size by constructing the state variable  $x_t$  using only the first page (10 reviews). Table 5-1 reports the esti-

mation results of the Ctrip data using a window size  $n$  equal to 10. We observe qualitatively the same results, e.g., there is a large variance in  $\gamma_1$  and small variance in  $\gamma_2$  across different tours. We find that the percentage of  $\gamma_1$  values greater than 1 is larger than the case with window size of 20, meaning that the relative boosting impact from firms' control (as opposed to positive reviews) is bigger when considering one page than two pages.

### Predictive Performance of SDE without response

To better understand the role of incorporating response in our SDE model, we conducted additional analyses by setting  $\alpha = 0$ , to emulate the case with no responses, which is denoted by SDE without response. We compare its predictive performance with our SDE model, ARMA and GARCH using the Ctrip data. The new model (SDE without response) performs worse than SDE, ARMA and GARCH in general. Table 5-2 presents the mean and standard deviation (in parenthesis) of the out-of-sample (both long-term and short-term) RMSE for the 117 tours. We further conduct paired t-test to examine whether the two sets of results are statistically different as shown in Table 5-3. The results clearly show that the model without considering responses is inferior. This additional analysis further strengthens the importance of factoring in responses.

## 6 Sample Snapshot from Ctrip

Figure 6-1 presents a translated snapshot of the page for writing reviews at Ctrip.com. As we can see in Ctrip's review page, it prominently lists recent reviews on the right side, and thus future reviewers have a higher chance to read them.

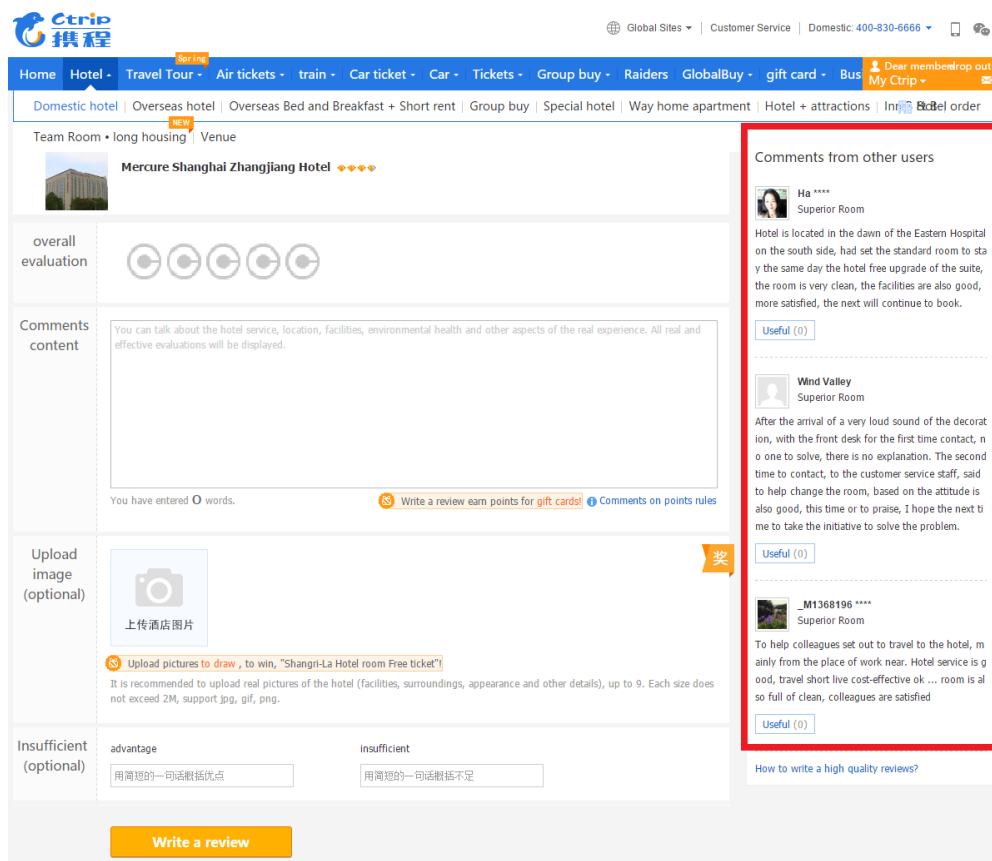

Figure 6-1: Translated Snapshot of Reviewer's Writing Review Page from Ctrip.com

Table 6-1 and 6-2 present ARMA and GARCH estimates (with t-statistic in parenthesis) for 117 tours in Ctrip data.

Table 4-1: The Parameter Estimation Results for the rest 107 tours in Ctrip Data

| Tour ID | $\hat{\lambda}$  | $\hat{\rho}$     | $\hat{\alpha}$   | $\hat{\rho}$     | $\hat{\beta}$    | $\hat{\sigma}$   | $\gamma_1$ | $\gamma_2$ |
|---------|------------------|------------------|------------------|------------------|------------------|------------------|------------|------------|
| 56737   | 7.437***(0.804)  | 0.199***(0.020)  | 0.053*(0.033)    | 0.011**(0.006)   | 0.005***(0.000)  | 0.261***(0.004)  | 0.78       | 0.14       |
| 71478   | 0.624***(0.093)  | 0.365***(0.030)  | 0.035***(0.005)  | 0.051***(0.014)  | 0.022***(0.002)  | 0.056***(0.003)  | 1.72       | 0.21       |
| 49049   | 1.565***(0.227)  | 0.333***(0.030)  | 0.035***(0.007)  | 0.023***(0.007)  | 0.010***(0.001)  | 0.097***(0.003)  | 1.49       | 0.20       |
| 72526   | 0.932***(0.214)  | 0.258***(0.028)  | 0.030***(0.010)  | 0.062***(0.015)  | 0.024***(0.003)  | 0.071***(0.004)  | 0.71       | 0.20       |
| 32391   | 1.735***(0.372)  | 0.309***(0.026)  | 0.012*(0.009)    | 0.046***(0.007)  | 0.011***(0.001)  | 0.107***(0.003)  | 0.21       | 0.37       |
| 72527   | 0.819***(0.187)  | 0.302***(0.051)  | 0.031***(0.008)  | 0.016(0.013)     | 0.010***(0.002)  | 0.060***(0.003)  | 3.50       | 0.10       |
| 69278   | 1.199***(0.273)  | 0.278***(0.036)  | 0.025***(0.009)  | 0.032***(0.010)  | 0.011***(0.002)  | 0.087***(0.003)  | 0.93       | 0.20       |
| 28245   | 1.052***(0.351)  | 0.357***(0.077)  | 0.011**(0.006)   | 0.012*(0.009)    | 0.005***(0.001)  | 0.075***(0.003)  | 1.39       | 0.23       |
| 30814   | 0.802***(0.398)  | 0.288***(0.113)  | 0.022***(0.013)  | 0.010(0.022)     | 0.008***(0.003)  | 0.090***(0.004)  | 3.83       | 0.08       |
| 16311   | 2.268***(0.293)  | 0.372***(0.020)  | 0.049***(0.009)  | 0.047***(0.006)  | 0.014***(0.001)  | 0.114***(0.003)  | 0.74       | 0.34       |
| 2753    | 0.339***(0.042)  | 0.187***(0.02)   | 0.021***(0.004)  | 0.017*(0.013)    | 0.033***(0.004)  | 0.05***(0.003)   | 4.56       | 0.04       |
| 3150    | 0.191***(0.054)  | 0.288***(0.013)  | 0.005*(0.003)    | 0.32***(0.02)    | 0.09***(0.005)   | 0.036***(0.003)  | 0.1        | 0.37       |
| 4171    | 0.231***(0.024)  | 0.313***(0.027)  | 0.017***(0.002)  | 0.022***(0.006)  | 0.027***(0.001)  | 0.043***(0.002)  | 4.88       | 0.08       |
| 5107    | 1.265*(0.928)    | 0.172***(0.088)  | 0.004(0.004)     | 0.002(0.005)     | 0.002(0.002)     | 0.088***(0.001)  | 1.67       | 0.08       |
| 5452    | 0.506***(0.067)  | 0.292***(0.015)  | 0.003*(0.002)    | 0.072****(0.006) | 0.015***(0.001)  | 0.061****(0.001) | 0.12       | 0.37       |
| 5603    | 0.461***(0.227)  | 0.184****(0.043) | 0.004*(0.003)    | 0.017***(0.007)  | 0.009****(0.002) | 0.051****(0.002) | 0.65       | 0.14       |
| 6712    | 0.137***(0.078)  | 0.264****(0.03)  | 0.001(0.003)     | 0.195****(0.022) | 0.068****(0.007) | 0.03****(0.004)  | 0.07       | 0.33       |
| 7297    | 0.637***(0.32)   | 0.244***(0.119)  | 0.007***(0.004)  | 0(0.01)          | 0.005***(0.003)  | 0.056****(0.002) | 33.89      | 0.01       |
| 9474    | 0.389****(0.049) | 0.282****(0.009) | 0.005***(0.002)  | 0.16****(0.008)  | 0.04****(0.002)  | 0.046****(0.002) | 0.11       | 0.35       |
| 11626   | 0.245****(0.102) | 0.297****(0.03)  | 0.007***(0.005)  | 0.164****(0.029) | 0.042****(0.006) | 0.045****(0.004) | 0.26       | 0.34       |
| 12043   | 0.184***(0.096)  | 0.121****(0.027) | 0.003*(0.002)    | 0.031****(0.008) | 0.03****(0.004)  | 0.029****(0.002) | 0.65       | 0.08       |
| 17184   | 0.24****(0.062)  | 0.293****(0.051) | 0.003*(0.002)    | 0.034****(0.01)  | 0.007****(0.001) | 0.045****(0.002) | 0.55       | 0.27       |
| 18201   | 0.193****(0.032) | 0.2****(0.024)   | 0.01****(0.002)  | 0.031***(0.015)  | 0.047****(0.007) | 0.04****(0.003)  | 2.14       | 0.08       |
| 20131   | 0.304(0.604)     | 0.296***(0.144)  | 0.004(0.013)     | 0.07***(0.04)    | 0.012***(0.005)  | 0.066****(0.008) | 0.26       | 0.33       |
| 21148   | 0.18****(0.053)  | 0.321****(0.024) | 0.003***(0.002)  | 0.121****(0.016) | 0.027****(0.003) | 0.028****(0.002) | 0.21       | 0.39       |
| 21509   | 0.475****(0.054) | 0.36****(0.028)  | 0.037****(0.006) | 0.063****(0.007) | 0.037****(0.001) | 0.064****(0.004) | 1.93       | 0.19       |
| 22510   | 0.435****(0.048) | 0.422****(0.014) | 0.019****(0.007) | 0.448****(0.015) | 0.064****(0.002) | 0.083****(0.005) | 0.17       | 0.63       |
| 22809   | 0.484****(0.042) | 0.293****(0.006) | 0.02***(0.01)    | 1.023****(0.014) | 0.302****(0.004) | 0.137****(0.007) | 0.06       | 0.39       |
| 26561   | 0.356***(0.185)  | 0.327****(0.06)  | 0.003*(0.002)    | 0.021***(0.01)   | 0.008****(0.002) | 0.041****(0.002) | 0.53       | 0.32       |
| 28977   | 0.462****(0.151) | 0.361****(0.04)  | 0.001(0.002)     | 0.038****(0.007) | 0.006****(0.001) | 0.053****(0.001) | 0.05       | 0.54       |
| 44981   | 0.188***(0.082)  | 0.375****(0.04)  | 0.002***(0.001)  | 0.044****(0.012) | 0.012****(0.002) | 0.026****(0.001) | 0.41       | 0.43       |
| 46254   | 0.313****(0.051) | 0.418****(0.012) | 0.004*(0.003)    | 0.352****(0.016) | 0.067****(0.003) | 0.047****(0.003) | 0.06       | 0.67       |
| 49063   | 0.214****(0.033) | 0.366****(0.019) | 0.011****(0.004) | 0.356****(0.02)  | 0.062****(0.003) | 0.054****(0.004) | 0.23       | 0.47       |
| 49232   | 0.333****(0.065) | 0.303****(0.041) | 0.01****(0.002)  | 0.014*(0.01)     | 0.014****(0.002) | 0.037****(0.002) | 2.99       | 0.11       |
| 49435   | 0.421****(0.135) | 0.262****(0.059) | 0.01****(0.004)  | 0.016*(0.011)    | 0.011****(0.002) | 0.048****(0.003) | 2.11       | 0.11       |
| 50327   | 0.583****(0.034) | 0.35****(0.009)  | 0.008*(0.006)    | 0.363****(0.009) | 0.062****(0.001) | 0.103****(0.003) | 0.06       | 0.51       |
| 51324   | 0.599****(0.049) | 0.219****(0.007) | 0.005***(0.003)  | 0.136****(0.007) | 0.055****(0.002) | 0.069****(0.002) | 0.07       | 0.26       |
| 52165   | 2.07****(0.19)   | 0.236****(0.008) | 0.009*(0.006)    | 0.087****(0.003) | 0.028****(0.001) | 0.114****(0.002) | 0.07       | 0.29       |
| 52950   | 0.284****(0.048) | 0.206****(0.017) | 0.011****(0.002) | 0.05****(0.015)  | 0.056****(0.008) | 0.034****(0.002) | 1.02       | 0.13       |
| 53795   | 0.186****(0.027) | 0.236****(0.015) | 0.003*(0.002)    | 0.151****(0.015) | 0.027****(0.002) | 0.034****(0.002) | 0.14       | 0.27       |
| 55106   | 0.174(0.361)     | 0.642****(0.045) | 0(0.002)         | 0.2****(0.03)    | 0.018****(0.003) | 0.026****(0.003) | 0.01       | 1.76       |
| 55830   | 0.34****(0.088)  | 0.455****(0.03)  | 0.004*(0.002)    | 0.094****(0.017) | 0.019****(0.003) | 0.039****(0.002) | 0.21       | 0.69       |
| 60195   | 0.485****(0.183) | 0.152****(0.055) | 0.014****(0.006) | 0.001(0.012)     | 0.019****(0.006) | 0.058****(0.004) | 24.2       | 0.01       |
| 60639   | 0.129*(0.081)    | 0.189****(0.05)  | 0.006****(0.002) | 0.045***(0.024)  | 0.039****(0.012) | 0.029****(0.004) | 1.37       | 0.1        |
| 63798   | 0.3****(0.065)   | 0.532****(0.015) | 0.003*(0.002)    | 0.277****(0.017) | 0.034****(0.002) | 0.036****(0.002) | 0.09       | 1.05       |
| 66207   | 0.318(0.312)     | 0.311*(0.238)    | 0.008***(0.004)  | 0.004(0.026)     | 0.007(0.008)     | 0.031****(0.004) | 9.38       | 0.04       |
| 66215   | 0.272****(0.073) | 0.267****(0.025) | 0.005*(0.003)    | 0.103****(0.022) | 0.037****(0.006) | 0.04****(0.003)  | 0.23       | 0.3        |
| 66287   | 0.339****(0.021) | 0.361****(0.006) | 0.003***(0.002)  | 0.291****(0.007) | 0.072****(0.002) | 0.059****(0.002) | 0.05       | 0.54       |
| 66865   | 0.838*(0.616)    | 0.103****(0.041) | 0.003(0.01)      | 0.02(0.018)      | 0.012***(0.007)  | 0.07****(0.004)  | 0.22       | 0.09       |
| 69925   | 0.352****(0.057) | 0.554****(0.023) | 0.002(0.005)     | 0.292****(0.018) | 0.05****(0.003)  | 0.06****(0.005)  | 0.04       | 1.19       |
| 71821   | 0.35****(0.136)  | 0.333****(0.045) | 0.009*(0.007)    | 0.108****(0.018) | 0.019****(0.002) | 0.049****(0.004) | 0.34       | 0.37       |
| 72202   | 0.559****(0.231) | 0.191****(0.044) | 0.014*(0.009)    | 0.039****(0.016) | 0.013****(0.003) | 0.055****(0.004) | 0.81       | 0.13       |
| 72532   | 0.707****(0.117) | 0.225****(0.025) | 0.027****(0.005) | 0.024****(0.006) | 0.023****(0.002) | 0.061****(0.003) | 2.04       | 0.1        |
| 72603   | 0.128*(0.095)    | 0.525****(0.148) | 0.001*(0.001)    | 0.016(0.017)     | 0.005***(0.002)  | 0.018****(0.002) | 1.24       | 0.49       |
| 72723   | 2.243****(0.194) | 0.141****(0.012) | 0.026***(0.014)  | 0.001(0.01)      | 0.005****(0)     | 0.144****(0.003) | 9.29       | 0.02       |
| 72869   | 0.421****(0.048) | 0.514****(0.007) | 0.011****(0.004) | 0.668****(0.018) | 0.08****(0.002)  | 0.055****(0.003) | 0.08       | 0.98       |
| 73163   | 0.272****(0.034) | 0.364****(0.014) | 0(0.002)         | 0.182****(0.01)  | 0.034****(0.002) | 0.042****(0.002) | 0.01       | 0.57       |
| 73186   | 0.319****(0.074) | 0.37****(0.076)  | 0.01****(0.002)  | 0.004(0.01)      | 0.009****(0.002) | 0.039****(0.002) | 12.36      | 0.04       |
| 74983   | 0.401****(0.133) | 0.333****(0.064) | 0.011***(0.005)  | 0.029****(0.012) | 0.011****(0.002) | 0.042****(0.003) | 1.38       | 0.21       |
| 78546   | 0.377****(0.136) | 0.564****(0.037) | 0.005****(0.002) | 0.07****(0.011)  | 0.016****(0.002) | 0.035****(0.002) | 0.43       | 0.9        |
| 79499   | 1.629****(0.535) | 0.38****(0.036)  | 0.06*(0.041)     | 0.226****(0.036) | 0.046****(0.006) | 0.122****(0.015) | 0.26       | 0.49       |
| 79769   | 0.732****(0.182) | 0.366****(0.056) | 0.035*(0.027)    | 0.149****(0.025) | 0.024****(0.002) | 0.145****(0.012) | 0.5        | 0.38       |

Notes. The estimation is based on the in-sample data for each tour. The standard error is reported in parentheses.

\*\*\*  $p \leq 0.01$ ; \*\*  $p \leq 0.05$ ; \*  $p \leq 0.10$ .

| Tour ID | $\hat{\lambda}$  | $\hat{\rho}$     | $\hat{\alpha}$   | $\hat{\rho}$     | $\hat{\beta}$    | $\hat{\sigma}$   | $\gamma_1$ | $\gamma_2$ |
|---------|------------------|------------------|------------------|------------------|------------------|------------------|------------|------------|
| 83878   | 0.304***(0.033)  | 0.515***(0.012)  | 0.004*(0.003)    | 0.459***(0.012)  | 0.063***(0.001)  | 0.059***(0.003)  | 0.06       | 1          |
| 84052   | 0.748***(0.053)  | 0.5***(0.015)    | 0.054***(0.009)  | 0.28***(0.007)   | 0.041***(0.001)  | 0.18***(0.005)   | 0.52       | 0.66       |
| 93877   | 0.777***(0.187)  | 0.216***(0.03)   | 0.024***(0.012)  | 0.067****(0.021) | 0.024****(0.004) | 0.076****(0.005) | 0.6        | 0.17       |
| 1605378 | 3.638***(0.911)  | 0.421***(0.019)  | 0.031*(0.02)     | 0.116****(0.01)  | 0.021****(0.001) | 0.124****(0.005) | 0.13       | 0.64       |
| 1605628 | 0.52***(0.248)   | 0.485****(0.053) | 0.016*(0.012)    | 0.17****(0.04)   | 0.016****(0.003) | 0.047****(0.006) | 0.34       | 0.7        |
| 1607268 | 1.714****(0.418) | 0.522****(0.019) | 0.015*(0.011)    | 0.161****(0.011) | 0.024****(0.001) | 0.094****(0.005) | 0.11       | 0.98       |
| 1608443 | 0.473****(0.08)  | 0.339****(0.048) | 0.042*(0.033)    | 0.188****(0.026) | 0.041****(0.002) | 0.291****(0.016) | 0.71       | 0.3        |
| 1609587 | 2.147****(0.896) | 0.436****(0.039) | 0.04*(0.031)     | 0.141****(0.019) | 0.024****(0.003) | 0.131****(0.01)  | 0.24       | 0.63       |
| 1612648 | 0.606****(0.1)   | 0.158****(0.022) | 0.033*(0.022)    | 0.105****(0.018) | 0.065****(0.004) | 0.224****(0.011) | 0.61       | 0.12       |
| 1614660 | 0.569****(0.122) | 0.196****(0.037) | 0.071***(0.032)  | 0.064*(0.04)     | 0.082****(0.009) | 0.164****(0.019) | 2.42       | 0.07       |
| 1617321 | 0.769****(0.293) | 0.222****(0.036) | 0.013*(0.009)    | 0.048****(0.012) | 0.022****(0.003) | 0.073****(0.004) | 0.47       | 0.19       |
| 1620855 | 4.505****(0.748) | 0.414****(0.017) | 0.037*(0.028)    | 0.143****(0.012) | 0.03****(0.002)  | 0.154****(0.007) | 0.1        | 0.64       |
| 1621632 | 2.546****(0.198) | 0.399****(0.01)  | 0.035****(0.014) | 0.207****(0.004) | 0.039****(0.001) | 0.148****(0.004) | 0.11       | 0.6        |
| 1621699 | 0.828****(0.243) | 0.196****(0.013) | 0.029*(0.02)     | 0.306****(0.043) | 0.123****(0.014) | 0.089****(0.01)  | 0.14       | 0.21       |
| 1623624 | 1.59***(0.755)   | 0.227****(0.022) | 0.065 (0.052)    | 0.289****(0.036) | 0.091****(0.009) | 0.133****(0.017) | 0.18       | 0.25       |
| 1624666 | 1.18***(0.595)   | 0.309****(0.052) | 0.06***(0.035)   | 0.121****(0.041) | 0.024****(0.005) | 0.085****(0.011) | 0.61       | 0.28       |
| 1633110 | 0.577****(0.228) | 0.258****(0.099) | 0.015***(0.007)  | 0.001 (0.016)    | 0.017****(0.006) | 0.075****(0.005) | 30.31      | 0.01       |
| 85207   | 0.871****(0.171) | 0.176****(0.015) | 0.012*(0.009)    | 0.096****(0.014) | 0.034****(0.004) | 0.079****(0.004) | 0.17       | 0.18       |
| 85282   | 0.652****(0.077) | 0.281****(0.021) | 0.013***(0.008)  | 0.108****(0.007) | 0.024****(0.001) | 0.117****(0.004) | 0.26       | 0.31       |
| 93804   | 0.541****(0.06)  | 0.3****(0.01)    | 0.015***(0.007)  | 0.368****(0.009) | 0.08****(0.002)  | 0.08****(0.004)  | 0.11       | 0.39       |
| 60051   | 0.13****(0.02)   | 0.4****(0.012)   | 0.017***(0.007)  | 1.825****(0.017) | 0.437****(0.004) | 0.127****(0.011) | 0.12       | 0.6        |
| 44248   | 0.178****(0.036) | 0.32****(0.039)  | 0.007****(0.001) | 0.027***(0.012)  | 0.032****(0.004) | 0.025****(0.002) | 2.13       | 0.15       |
| 69982   | 0.326*(0.198)    | 0.24***(0.055)   | 0.005*(0.004)    | 0.036***(0.016)  | 0.025****(0.007) | 0.044****(0.004) | 0.57       | 0.2        |
| 76106   | 0.17***(0.016)   | 0.2***(0.01)     | 0.008****(0.002) | 0.206****(0.016) | 0.066****(0.003) | 0.047****(0.002) | 0.3        | 0.19       |
| 1601410 | 0.672****(0.268) | 0.231****(0.042) | 0.017***(0.01)   | 0.052****(0.017) | 0.024****(0.005) | 0.062****(0.005) | 0.61       | 0.19       |
| 11869   | 0.314****(0.048) | 0.25****(0.018)  | 0.003*(0.003)    | 0.09****(0.01)   | 0.025****(0.002) | 0.052****(0.002) | 0.16       | 0.29       |
| 78511   | 0.195****(0.025) | 0.56****(0.01)   | 0.004****(0.001) | 0.406****(0.015) | 0.04****(0.001)  | 0.037****(0.002) | 0.1        | 1.15       |
| 82421   | 0.251****(0.065) | 0.4****(0.028)   | 0.014****(0.004) | 0.189****(0.031) | 0.048****(0.005) | 0.043****(0.004) | 0.49       | 0.45       |
| 15618   | 0.124****(0.023) | 0.32****(0.006)  | 0.005*(0.003)    | 1.322****(0.021) | 0.305****(0.005) | 0.041****(0.004) | 0.04       | 0.45       |
| 36953   | 0.143****(0.034) | 0.333****(0.039) | 0.002 (0.002)    | 0.103****(0.018) | 0.017****(0.002) | 0.037****(0.002) | 0.25       | 0.4        |
| 66666   | 0.146****(0.011) | 0.5****(0.007)   | 0.000 (0.001)    | 0.595****(0.007) | 0.091****(0.001) | 0.044****(0.002) | 0          | 1          |
| 94870   | 0.535****(0.098) | 0.28****(0.019)  | 0.048****(0.012) | 0.223****(0.02)  | 0.065****(0.004) | 0.063****(0.007) | 0.56       | 0.25       |
| 91836   | 0.36****(0.04)   | 0.4****(0.01)    | 0.009***(0.004)  | 0.426****(0.017) | 0.092****(0.003) | 0.063****(0.004) | 0.1        | 0.61       |
| 22349   | 0.182****(0.073) | 0.28****(0.073)  | 0.006***(0.003)  | 0.022*(0.015)    | 0.018****(0.004) | 0.031****(0.003) | 2.21       | 0.12       |
| 83648   | 1.07****(0.178)  | 0.379****(0.041) | 0.045****(0.011) | 0.042****(0.009) | 0.016****(0.001) | 0.099****(0.005) | 1.61       | 0.23       |
| 44983   | 0.298****(0.071) | 0.174****(0.019) | 0.006****(0.002) | 0.039****(0.008) | 0.037****(0.004) | 0.036****(0.002) | 0.66       | 0.13       |
| 71801   | 0.25****(0.019)  | 0.321****(0.008) | 0.052****(0.008) | 0.999****(0.012) | 0.168****(0.002) | 0.115****(0.005) | 0.31       | 0.36       |
| 58776   | 0.128****(0.023) | 0.24****(0.018)  | 0.008****(0.002) | 0.155****(0.02)  | 0.059****(0.005) | 0.028****(0.003) | 0.53       | 0.21       |
| 74359   | 0.376***(0.167)  | 0.429****(0.021) | 0.009***(0.005)  | 0.232****(0.02)  | 0.032****(0.002) | 0.036****(0.004) | 0.18       | 0.64       |
| 1603059 | 0.447****(0.132) | 0.214****(0.021) | 0.014***(0.008)  | 0.141****(0.015) | 0.045****(0.004) | 0.058****(0.005) | 0.29       | 0.21       |
| 76500   | 7.223****(0.731) | 0.373****(0.017) | 0.708****(0.121) | 0.245****(0.019) | 0.034****(0.001) | 0.269****(0.016) | 0.64       | 0.36       |
| 66306   | 0.451****(0.037) | 0.586****(0.013) | 0.048****(0.004) | 0.326****(0.025) | 0.059****(0.003) | 0.054****(0.004) | 0.78       | 0.79       |
| 1626293 | 0.62****(0.068)  | 0.348****(0.011) | 0.019***(0.01)   | 0.438****(0.015) | 0.11****(0.003)  | 0.101****(0.006) | 0.11       | 0.48       |
| 1629646 | 1.662****(0.307) | 0.72****(0.023)  | 0.051***(0.028)  | 0.494****(0.036) | 0.027****(0.001) | 0.146****(0.011) | 0.22       | 2.11       |
| 90928   | 0.555****(0.057) | 0.68****(0.014)  | 0.033****(0.005) | 0.41****(0.02)   | 0.036****(0.001) | 0.065****(0.004) | 0.45       | 1.46       |

Notes. The estimation is based on the in-sample data for each tour. The standard error is reported in parentheses.

\*\*\*  $p \leq 0.01$ ; \*\*  $p \leq 0.05$ ; \*  $p \leq 0.10$ .

Table 4-2: In-Sample Performance Results (Steady State Mean and RMSE)

| Tour ID | Steady State Mean |                    |                     |                  |                  |        | In-Sample RMSE |        |        |        |        |
|---------|-------------------|--------------------|---------------------|------------------|------------------|--------|----------------|--------|--------|--------|--------|
|         | $\hat{\mu}_{SDE}$ | $\hat{\mu}_{ARMA}$ | $\hat{\mu}_{GARCH}$ | $\hat{\mu}_{MA}$ | $\hat{\mu}_{ES}$ | $\mu$  | SDE            | ARMA   | GARCH  | MA     | ES     |
| 5106    | 4.6352            | 4.6421             | 4.6385              | 4.8916           | 4.8943           | 4.6547 | 0.1364         | 0.1350 | 0.1376 | 0.1780 | 0.1837 |
| 72528   | 4.5189            | 4.5088             | 4.5247              | 4.5916           | 4.5943           | 4.5089 | 0.1504         | 0.1504 | 0.1576 | 0.1502 | 0.1502 |
| 73154   | 4.5507            | 4.5440             | 4.5664              | 4.7082           | 4.7055           | 4.5444 | 0.1491         | 0.1522 | 0.1529 | 0.2159 | 0.2145 |
| 80961   | 4.7626            | 4.7616             | 4.8101              | 4.8166           | 4.8110           | 4.7610 | 0.1552         | 0.1563 | 0.1614 | 0.1625 | 0.1622 |
| 29336   | 4.6961            | 4.6883             | 4.7240              | 4.7582           | 4.7555           | 4.6862 | 0.1363         | 0.1385 | 0.1466 | 0.1808 | 0.1754 |
| 23222   | 4.7165            | 4.7124             | 4.7098              | 4.7499           | 4.7499           | 4.7065 | 0.1251         | 0.1246 | 0.1331 | 0.1257 | 0.1244 |
| 30938   | 4.6682            | 4.6480             | 4.7442              | 4.6082           | 4.6055           | 4.6582 | 0.1776         | 0.1778 | 0.2139 | 0.1835 | 0.1837 |
| 71480   | 4.7005            | 4.6928             | 4.7576              | 4.7082           | 4.7055           | 4.6906 | 0.1567         | 0.1572 | 0.1704 | 0.1603 | 0.1598 |
| 88292   | 4.7203            | 4.7100             | 4.7907              | 4.6249           | 4.6332           | 4.7103 | 0.1681         | 0.1613 | 0.1786 | 0.2209 | 0.2167 |
| 1618693 | 4.7964            | 4.8063             | 4.8370              | 4.8249           | 4.8332           | 4.8057 | 0.1129         | 0.1130 | 0.1167 | 0.1156 | 0.1162 |
| 56737   | 4.7338            | 4.7406             | 4.7969              | 4.7999           | 4.7999           | 4.7416 | 0.1342         | 0.1371 | 0.1392 | 0.1348 | 0.1350 |
| 71478   | 4.5837            | 4.5682             | 4.6153              | 4.5499           | 4.5499           | 4.5700 | 0.1449         | 0.1464 | 0.2189 | 0.2390 | 0.2394 |
| 49049   | 4.5757            | 4.5899             | 4.6636              | 4.9749           | 4.9832           | 4.5987 | 0.1990         | 0.1571 | 0.2096 | 0.3640 | 0.3670 |
| 72526   | 4.6391            | 4.6631             | 4.6089              | 4.6665           | 4.6777           | 4.6585 | 0.1213         | 0.1209 | 0.1620 | 0.1693 | 0.1670 |
| 32391   | 4.5847            | 4.5960             | 4.5707              | 4.8499           | 4.8499           | 4.5989 | 0.1563         | 0.1596 | 0.1644 | 0.2515 | 0.2493 |
| 72527   | 4.7113            | 4.6964             | 4.6314              | 4.6999           | 4.6999           | 4.6940 | 0.1342         | 0.1401 | 0.2973 | 0.1405 | 0.1412 |
| 69278   | 4.6799            | 4.6822             | 4.6980              | 4.8499           | 4.8499           | 4.6887 | 0.1319         | 0.1322 | 0.1414 | 0.2161 | 0.2161 |
| 28245   | 4.5205            | 4.5106             | 4.6387              | 4.7999           | 4.7999           | 4.5535 | 0.1994         | 0.2018 | 0.2231 | 0.2889 | 0.2886 |
| 30814   | 4.6986            | 4.7082             | 4.7306              | 4.4832           | 4.4888           | 4.6886 | 0.1315         | 0.1305 | 0.1457 | 0.2360 | 0.2332 |
| 16311   | 4.5463            | 4.5510             | 4.5674              | 4.7166           | 4.7277           | 4.5476 | 0.1529         | 0.1533 | 0.1557 | 0.1959 | 0.2010 |
| 2753    | 4.6230            | 4.6581             | 4.8523              | 4.1331           | 4.1355           | 4.6131 | 0.2564         | 0.2517 | 0.4700 | 0.2416 | 0.2414 |
| 3150    | 4.5309            | 4.5996             | 4.5828              | 4.6499           | 4.6499           | 4.5408 | 0.0741         | 0.0651 | 0.0990 | 0.2070 | 0.2029 |
| 4171    | 4.5754            | 4.6067             | 4.6412              | 4.5699           | 4.5742           | 4.5854 | 0.1434         | 0.1427 | 0.1465 | 0.1764 | 0.1753 |
| 5107    | 4.6252            | 4.6397             | 4.7013              | 4.7999           | 4.7999           | 4.6263 | 0.1632         | 0.1669 | 0.1751 | 0.1993 | 0.1991 |
| 5452    | 4.6348            | 4.6522             | 4.6641              | 4.5932           | 4.5870           | 4.6354 | 0.1391         | 0.1380 | 0.1396 | 0.2078 | 0.2089 |
| 5603    | 4.6369            | 4.6939             | 4.7474              | 4.6499           | 4.6499           | 4.6467 | 0.1078         | 0.1088 | 0.1790 | 0.1560 | 0.1560 |
| 6712    | 4.4796            | 4.6918             | 4.8978              | 4.5834           | 4.5859           | 4.4895 | 0.1390         | 0.1489 | 0.4250 | 0.1781 | 0.1789 |
| 7297    | 4.5287            | 4.5459             | 4.5185              | 4.4565           | 4.4627           | 4.5190 | 0.1790         | 0.1777 | 0.2531 | 0.2664 | 0.2654 |
| 9474    | 4.5919            | 4.6448             | 4.5968              | 4.5032           | 4.5028           | 4.5886 | 0.1186         | 0.1279 | 0.1253 | 0.2630 | 0.2656 |
| 11626   | 4.6009            | 4.6168             | 4.6467              | 4.7067           | 4.7057           | 4.6108 | 0.1155         | 0.1151 | 0.1309 | 0.2272 | 0.2269 |
| 12043   | 4.6287            | 4.6548             | 4.6340              | 4.5768           | 4.5729           | 4.6289 | 0.0790         | 0.0785 | 0.1032 | 0.2375 | 0.2350 |
| 17184   | 4.7572            | 4.7284             | 4.7629              | 4.4399           | 4.4413           | 4.7473 | 0.1583         | 0.1502 | 0.1513 | 0.2310 | 0.2263 |
| 18201   | 4.4643            | 4.5317             | 4.2819              | 4.2266           | 4.2227           | 4.4060 | 0.2375         | 0.2268 | 0.3958 | 0.4029 | 0.4070 |
| 20131   | 4.7258            | 4.6338             | 4.6456              | 4.7434           | 4.7443           | 4.7358 | 0.1094         | 0.1062 | 0.2996 | 0.2427 | 0.2407 |
| 21148   | 4.6064            | 4.5909             | 4.6241              | 4.4463           | 4.4541           | 4.5984 | 0.1100         | 0.1096 | 0.1188 | 0.1139 | 0.1135 |
| 21509   | 4.4951            | 4.6069             | 4.5439              | 4.3999           | 4.3999           | 4.5050 | 0.1463         | 0.1461 | 0.1546 | 0.1936 | 0.1930 |
| 22510   | 4.5913            | 4.5770             | 4.5270              | 4.7097           | 4.7155           | 4.5918 | 0.1257         | 0.1251 | 0.2036 | 0.1520 | 0.1520 |
| 22809   | 4.4810            | 4.5099             | 4.4718              | 4.4767           | 4.4728           | 4.4828 | 0.1445         | 0.1598 | 0.1523 | 0.2892 | 0.2840 |
| 26561   | 4.4538            | 4.4654             | 4.5345              | 4.4699           | 4.4742           | 4.4479 | 0.1833         | 0.1990 | 0.2042 | 0.2764 | 0.2754 |
| 28977   | 4.6040            | 4.5864             | 4.6708              | 4.7699           | 4.7671           | 4.6102 | 0.1601         | 0.1613 | 0.1740 | 0.1653 | 0.1657 |
| 44981   | 4.4678            | 4.4695             | 4.4451              | 4.4299           | 4.4328           | 4.4486 | 0.1486         | 0.1412 | 0.1432 | 0.1562 | 0.1535 |
| 46254   | 4.4352            | 4.4545             | 4.4517              | 4.1466           | 4.1471           | 4.4268 | 0.1233         | 0.1264 | 0.1440 | 0.3042 | 0.3038 |
| 49063   | 4.6195            | 4.5692             | 4.6151              | 4.6094           | 4.6225           | 4.5809 | 0.1457         | 0.1443 | 0.1440 | 0.1541 | 0.1539 |
| 49232   | 4.5243            | 4.5361             | 4.5256              | 4.4133           | 4.4113           | 4.5241 | 0.0956         | 0.0956 | 0.1008 | 0.1922 | 0.1918 |
| 49435   | 4.6193            | 4.6656             | 4.6828              | 4.4065           | 4.4055           | 4.6081 | 0.1389         | 0.1471 | 0.1479 | 0.2410 | 0.2410 |
| 50327   | 4.6032            | 4.6014             | 4.5796              | 4.5833           | 4.5785           | 4.6029 | 0.1866         | 0.1853 | 0.1854 | 0.2376 | 0.2416 |
| 51324   | 4.5243            | 4.5294             | 4.5783              | 4.6465           | 4.6542           | 4.5240 | 0.1799         | 0.1804 | 0.1910 | 0.3589 | 0.3597 |
| 52165   | 4.5681            | 4.6475             | 4.6417              | 4.5832           | 4.5928           | 4.5706 | 0.1567         | 0.1600 | 0.1641 | 0.2822 | 0.2853 |
| 52950   | 4.3679            | 4.4099             | 4.2787              | 4.2898           | 4.2913           | 4.3637 | 0.1248         | 0.1090 | 0.4716 | 0.4583 | 0.4596 |
| 53795   | 4.7648            | 4.7849             | 4.8000              | 4.8965           | 4.8970           | 4.7707 | 0.0976         | 0.0983 | 0.1013 | 0.1298 | 0.1340 |
| 55106   | 4.3268            | 4.3092             | 4.3252              | 4.3635           | 4.3615           | 4.3338 | 0.0869         | 0.0871 | 0.0884 | 0.0896 | 0.0878 |
| 55830   | 4.4012            | 4.4603             | 4.4556              | 4.1432           | 4.1442           | 4.4062 | 0.1509         | 0.1643 | 0.1499 | 0.1900 | 0.1930 |
| 60195   | 4.5605            | 4.6133             | 4.5924              | 4.4231           | 4.4269           | 4.5559 | 0.1234         | 0.1141 | 0.1501 | 0.2628 | 0.2589 |
| 60639   | 4.6059            | 4.5662             | 4.7691              | 4.4106           | 4.4016           | 4.4770 | 0.1190         | 0.1214 | 0.3695 | 0.2146 | 0.2138 |
| 63798   | 4.4312            | 4.4141             | 4.4511              | 4.5399           | 4.5413           | 4.4335 | 0.1176         | 0.1174 | 0.1198 | 0.1273 | 0.1289 |
| 66207   | 4.6460            | 4.4759             | 4.4851              | 4.3904           | 4.3844           | 4.4108 | 0.1763         | 0.1765 | 0.2612 | 0.1885 | 0.1885 |
| 66215   | 4.5198            | 4.5737             | 4.7546              | 4.6463           | 4.6540           | 4.5296 | 0.1757         | 0.1764 | 0.3604 | 0.2275 | 0.2306 |
| 66287   | 4.4088            | 4.4169             | 4.3960              | 4.3999           | 4.4070           | 4.4088 | 0.1968         | 0.1965 | 0.1948 | 0.2510 | 0.2492 |

| Tour ID        | Steady State Mean |                    |                     |                  |                  |               | In-Sample RMSE |               |               |               |               |
|----------------|-------------------|--------------------|---------------------|------------------|------------------|---------------|----------------|---------------|---------------|---------------|---------------|
|                | $\hat{\mu}_{SDE}$ | $\hat{\mu}_{ARMA}$ | $\hat{\mu}_{GARCH}$ | $\hat{\mu}_{MA}$ | $\hat{\mu}_{ES}$ | $\mu$         | SDE            | ARMA          | GARCH         | MA            | ES            |
| 66865          | 4.7346            | 4.7997             | 4.8720              | 4.8632           | 4.8613           | 4.7443        | 0.1336         | 0.1338        | 0.1905        | 0.1551        | 0.1551        |
| 69925          | 4.1616            | 4.0761             | 4.3093              | 4.4892           | 4.5053           | 4.1707        | 0.3684         | 0.3038        | 0.4363        | 0.3883        | 0.3898        |
| 71821          | 4.7002            | 4.6814             | 4.6499              | 4.6399           | 4.6413           | 4.6999        | 0.0946         | 0.0945        | 0.1780        | 0.1000        | 0.0995        |
| 72202          | 4.7965            | 4.7833             | 4.8020              | 4.8495           | 4.8568           | 4.7874        | 0.0865         | 0.0861        | 0.0883        | 0.1257        | 0.1257        |
| 72532          | 4.5873            | 4.6608             | 4.6569              | 4.6732           | 4.6699           | 4.5971        | 0.1145         | 0.1151        | 0.1231        | 0.2282        | 0.2282        |
| 72603          | 4.2802            | 4.3201             | 4.2927              | 4.2499           | 4.2499           | 4.2815        | 0.1056         | 0.0971        | 0.1294        | 0.1984        | 0.2010        |
| 72723          | 4.7587            | 4.7428             | 4.7659              | 4.8366           | 4.8313           | 4.7687        | 0.1533         | 0.1438        | 0.1376        | 0.2317        | 0.2356        |
| 72869          | 4.4774            | 4.4618             | 4.4670              | 4.5965           | 4.5970           | 4.4759        | 0.0960         | 0.0959        | 0.0955        | 0.0958        | 0.0958        |
| 73163          | 4.5147            | 4.5228             | 4.5823              | 4.5633           | 4.5613           | 4.5118        | 0.2162         | 0.2162        | 0.2284        | 0.2161        | 0.2158        |
| 73186          | 4.5360            | 4.4722             | 4.5129              | 3.9966           | 3.9971           | 4.4659        | 0.2207         | 0.2237        | 0.2254        | 0.3376        | 0.3369        |
| 74983          | 4.6482            | 4.6000             | 4.5646              | 4.4800           | 4.4756           | 4.6510        | 0.1146         | 0.1278        | 0.1487        | 0.1779        | 0.1801        |
| 78546          | 4.1531            | 4.1715             | 4.0845              | 3.9366           | 3.9385           | 4.1463        | 0.1369         | 0.1094        | 0.3270        | 0.4560        | 0.4502        |
| 79499          | 4.5474            | 4.4577             | 4.4261              | 4.3936           | 4.3945           | 4.5374        | 0.1059         | 0.1084        | 0.1111        | 0.1392        | 0.1359        |
| 79769          | 4.7022            | 4.5644             | 4.5886              | 4.4994           | 4.5068           | 4.6923        | 0.0934         | 0.0940        | 0.0956        | 0.1313        | 0.1253        |
| 83878          | 4.3949            | 4.4235             | 4.3995              | 4.3966           | 4.3971           | 4.3947        | 0.2151         | 0.2114        | 0.2654        | 0.2088        | 0.2078        |
| 84052          | 4.5626            | 4.5462             | 4.5535              | 4.4232           | 4.4270           | 4.5625        | 0.1698         | 0.1701        | 0.1719        | 0.1760        | 0.1745        |
| 93877          | 4.7032            | 4.6971             | 4.7321              | 4.5129           | 4.5183           | 4.6932        | 0.1443         | 0.1433        | 0.1532        | 0.2183        | 0.2187        |
| 1605378        | 4.4834            | 4.4790             | 4.4839              | 4.4399           | 4.4413           | 4.4832        | 0.1269         | 0.1268        | 0.1292        | 0.1508        | 0.1508        |
| 1605628        | 4.6951            | 4.6090             | 4.6165              | 4.7558           | 4.7624           | 4.7051        | 0.1447         | 0.1438        | 0.3069        | 0.1680        | 0.1682        |
| 1607268        | 4.3601            | 4.3412             | 4.3803              | 4.2800           | 4.2757           | 4.3504        | 0.1393         | 0.1401        | 0.1596        | 0.4051        | 0.4025        |
| 1608443        | 4.6949            | 4.6146             | 4.6025              | 4.7499           | 4.7499           | 4.6995        | 0.2188         | 0.2060        | 0.2004        | 0.2069        | 0.2058        |
| 1609587        | 4.5205            | 4.4588             | 4.5140              | 4.5794           | 4.5896           | 4.5138        | 0.1278         | 0.1278        | 0.1395        | 0.1716        | 0.1709        |
| 1612648        | 4.6655            | 4.6989             | 4.8509              | 4.5367           | 4.5314           | 4.6642        | 0.2328         | 0.2052        | 0.2712        | 0.2712        | 0.2712        |
| 1614660        | 4.5802            | 4.6900             | 4.6190              | 4.3223           | 4.3338           | 4.5735        | 0.1571         | 0.1501        | 0.4708        | 0.2010        | 0.2014        |
| 1617321        | 4.5973            | 4.6027             | 4.6542              | 4.5498           | 4.5570           | 4.5914        | 0.1476         | 0.1484        | 0.1601        | 0.1713        | 0.1724        |
| 1620855        | 4.4122            | 4.4054             | 4.4101              | 4.2767           | 4.2657           | 4.4027        | 0.1669         | 0.1683        | 0.1740        | 0.2372        | 0.2312        |
| 1621632        | 4.4985            | 4.5187             | 4.5171              | 4.5398           | 4.5484           | 4.4996        | 0.1758         | 0.1756        | 0.1739        | 0.1738        | 0.1741        |
| 1621699        | 4.6055            | 4.7151             | 4.8200              | 4.5697           | 4.5742           | 4.6147        | 0.0990         | 0.0993        | 0.3621        | 0.1371        | 0.1365        |
| 1623624        | 4.6379            | 4.7126             | 4.7457              | 4.6739           | 4.6630           | 4.6382        | 0.1007         | 0.1017        | 0.1081        | 0.1227        | 0.1227        |
| 1624666        | 4.7369            | 4.6872             | 4.6881              | 4.6957           | 4.7037           | 4.7338        | 0.1060         | 0.1009        | 0.2755        | 0.2075        | 0.2046        |
| 1633110        | 4.3277            | 4.3529             | 4.6673              | 3.9999           | 3.9999           | 4.3189        | 0.3075         | 0.2095        | 0.4758        | 0.4707        | 0.4729        |
| 85207          | 4.6976            | 4.7500             | 4.7651              | 4.6499           | 4.6499           | 4.6974        | 0.1371         | 0.1276        | 0.1301        | 0.1895        | 0.1860        |
| 85282          | 4.6811            | 4.6883             | 4.7328              | 4.4932           | 4.4942           | 4.6783        | 0.1640         | 0.1705        | 0.1782        | 0.1740        | 0.1740        |
| 93804          | 4.6127            | 4.6240             | 4.6070              | 4.5999           | 4.5999           | 4.6121        | 0.1234         | 0.1237        | 0.1784        | 0.1313        | 0.1305        |
| 60051          | 4.3744            | 4.3851             | 4.3571              | 4.2400           | 4.2414           | 4.3781        | 0.1533         | 0.1545        | 0.1584        | 0.1660        | 0.1650        |
| 44248          | 4.2595            | 4.3643             | 4.3299              | 4.4134           | 4.4115           | 4.2695        | 0.1434         | 0.1494        | 0.1867        | 0.2409        | 0.2440        |
| 69982          | 4.3847            | 4.4640             | 4.4762              | 4.3999           | 4.3999           | 4.3890        | 0.1325         | 0.1345        | 0.1645        | 0.2697        | 0.2708        |
| 76106          | 4.7090            | 4.7129             | 4.7527              | 4.6399           | 4.6413           | 4.7043        | 0.1534         | 0.1825        | 0.1607        | 0.1566        | 0.1571        |
| 1601410        | 4.6032            | 4.5860             | 4.5995              | 4.5662           | 4.5711           | 4.5932        | 0.0906         | 0.0908        | 0.0901        | 0.1025        | 0.1083        |
| 11869          | 4.6387            | 4.6382             | 4.6279              | 4.6833           | 4.6785           | 4.6430        | 0.1558         | 0.1556        | 0.2306        | 0.1777        | 0.1786        |
| 78511          | 4.4893            | 4.4910             | 4.4360              | 4.3999           | 4.3999           | 4.4882        | 0.1177         | 0.1175        | 0.1266        | 0.1753        | 0.1701        |
| 82421          | 4.4880            | 4.4446             | 4.3822              | 4.3431           | 4.3441           | 4.4805        | 0.1245         | 0.1346        | 0.1330        | 0.1849        | 0.1771        |
| 15618          | 4.5284            | 4.5046             | 4.5340              | 4.4999           | 4.4999           | 4.5270        | 0.0760         | 0.0801        | 0.4833        | 0.1234        | 0.1211        |
| 36953          | 4.6925            | 4.6804             | 4.7021              | 4.7635           | 4.7544           | 4.7025        | 0.1566         | 0.1528        | 0.1412        | 0.1480        | 0.1465        |
| 66666          | 4.3377            | 4.3502             | 4.3193              | 4.2933           | 4.2871           | 4.3422        | 0.1747         | 0.1665        | 0.1720        | 0.1861        | 0.1832        |
| 94870          | 4.6595            | 4.6565             | 4.6691              | 4.6397           | 4.6412           | 4.6655        | 0.1149         | 0.1194        | 0.1047        | 0.1178        | 0.1142        |
| 91836          | 4.4234            | 4.3992             | 4.5619              | 4.3034           | 4.2957           | 4.4331        | 0.1548         | 0.1614        | 0.3223        | 0.1812        | 0.1827        |
| 22349          | 4.5442            | 4.5192             | 4.6298              | 4.3296           | 4.3326           | 4.5438        | 0.1590         | 0.1158        | 0.1699        | 0.2170        | 0.2167        |
| 83648          | 4.5822            | 4.5711             | 4.4989              | 4.3898           | 4.3984           | 4.5899        | 0.1813         | 0.1778        | 0.1960        | 0.1760        | 0.1760        |
| 44983          | 4.4668            | 4.4982             | 4.5682              | 4.6031           | 4.6098           | 4.4638        | 0.1735         | 0.1719        | 0.2072        | 0.3714        | 0.3649        |
| 71801          | 4.7133            | 4.7056             | 4.6535              | 4.5900           | 4.5843           | 4.7144        | 0.0969         | 0.0984        | 0.1109        | 0.1209        | 0.1237        |
| 58776          | 4.6379            | 4.6144             | 4.5289              | 4.4439           | 4.4302           | 4.6314        | 0.1402         | 0.1349        | 0.1484        | 0.1524        | 0.1499        |
| 74359          | 4.5922            | 4.5639             | 4.5606              | 4.6096           | 4.6155           | 4.5826        | 0.0566         | 0.0565        | 0.0554        | 0.1162        | 0.1141        |
| 1603059        | 4.6827            | 4.6683             | 4.7571              | 4.6063           | 4.6126           | 4.6727        | 0.1019         | 0.1016        | 0.2846        | 0.1280        | 0.1280        |
| 76500          | 4.7610            | 4.7014             | 4.7085              | 4.7666           | 4.7642           | 4.7590        | 0.1056         | 0.1056        | 0.1215        | 0.1817        | 0.1778        |
| 66306          | 4.3690            | 4.2041             | 4.3756              | 4.0231           | 4.0269           | 4.3591        | 0.1587         | 0.1135        | 0.2430        | 0.3753        | 0.3745        |
| 1626293        | 4.4624            | 4.4702             | 4.4335              | 4.5863           | 4.5954           | 4.4691        | 0.1704         | 0.1688        | 0.1737        | 0.1665        | 0.1664        |
| 1629646        | 4.4894            | 4.4830             | 4.6025              | 4.4398           | 4.4413           | 4.4994        | 0.1294         | 0.1223        | 0.2958        | 0.5764        | 0.5786        |
| 90928          | 4.4284            | 4.4047             | 4.4628              | 4.2931           | 4.2941           | 4.4289        | 0.1747         | 0.1865        | 0.3413        | 0.2452        | 0.2449        |
| <b>average</b> | <b>4.5680</b>     | <b>4.5706</b>      | <b>4.5937</b>       | <b>4.5374</b>    | <b>4.5387</b>    | <b>4.5636</b> | <b>0.1457</b>  | <b>0.1431</b> | <b>0.1952</b> | <b>0.2107</b> | <b>0.2102</b> |

Table 4-3: In-Sample Performance Results (MAE and SMAPE)

| Tour ID | MAE    |        |        |        |        | SMAPE  |        |        |        |        |
|---------|--------|--------|--------|--------|--------|--------|--------|--------|--------|--------|
|         | SDE    | ARMA   | GARCH  | MA     | ES     | SDE    | ARMA   | GARCH  | MA     | ES     |
| 5106    | 0.1079 | 0.1102 | 0.1094 | 0.1465 | 0.1510 | 0.1788 | 0.1833 | 0.1804 | 0.2554 | 0.2651 |
| 72528   | 0.1185 | 0.1185 | 0.1179 | 0.1183 | 0.1183 | 0.1343 | 0.1343 | 0.1337 | 0.1340 | 0.1340 |
| 73154   | 0.1194 | 0.1225 | 0.1214 | 0.1757 | 0.1743 | 0.1416 | 0.1543 | 0.1443 | 0.2223 | 0.2200 |
| 80961   | 0.1242 | 0.1236 | 0.1198 | 0.1207 | 0.1205 | 0.2712 | 0.2775 | 0.2706 | 0.2731 | 0.2724 |
| 29336   | 0.1132 | 0.1155 | 0.1170 | 0.1423 | 0.1370 | 0.1982 | 0.2013 | 0.2058 | 0.2603 | 0.2476 |
| 23222   | 0.1040 | 0.1034 | 0.1030 | 0.1034 | 0.1026 | 0.2003 | 0.1993 | 0.2019 | 0.1986 | 0.1977 |
| 30938   | 0.1489 | 0.1491 | 0.1641 | 0.1554 | 0.1556 | 0.2312 | 0.2315 | 0.2628 | 0.2365 | 0.2365 |
| 71480   | 0.1250 | 0.1285 | 0.1308 | 0.1278 | 0.1277 | 0.2172 | 0.2213 | 0.2284 | 0.2219 | 0.2215 |
| 88292   | 0.1384 | 0.1294 | 0.1349 | 0.1911 | 0.1873 | 0.2479 | 0.2397 | 0.2561 | 0.3011 | 0.2978 |
| 1618693 | 0.0902 | 0.0905 | 0.0919 | 0.0916 | 0.0918 | 0.2561 | 0.2571 | 0.2646 | 0.2631 | 0.2640 |
| 56737   | 0.1066 | 0.1072 | 0.1036 | 0.1018 | 0.1016 | 0.2511 | 0.2529 | 0.2524 | 0.2456 | 0.2454 |
| 71478   | 0.1188 | 0.1207 | 0.1428 | 0.2126 | 0.2130 | 0.2394 | 0.2425 | 0.2649 | 0.3410 | 0.3413 |
| 49049   | 0.1606 | 0.1234 | 0.1386 | 0.3243 | 0.3276 | 0.2298 | 0.2021 | 0.2076 | 0.8400 | 0.8603 |
| 72526   | 0.1019 | 0.1017 | 0.1225 | 0.1425 | 0.1403 | 0.2140 | 0.2134 | 0.2490 | 0.2622 | 0.2597 |
| 32391   | 0.1299 | 0.1325 | 0.1367 | 0.2038 | 0.2016 | 0.1857 | 0.1886 | 0.1946 | 0.3239 | 0.3188 |
| 72527   | 0.1124 | 0.1182 | 0.1579 | 0.1195 | 0.1200 | 0.2590 | 0.2670 | 0.3042 | 0.2692 | 0.2696 |
| 69278   | 0.1053 | 0.1057 | 0.1115 | 0.1763 | 0.1763 | 0.1770 | 0.1782 | 0.1886 | 0.3379 | 0.3379 |
| 28245   | 0.1676 | 0.1697 | 0.1722 | 0.2205 | 0.2201 | 0.2182 | 0.2212 | 0.2267 | 0.3119 | 0.3112 |
| 30814   | 0.1105 | 0.1102 | 0.1071 | 0.2088 | 0.2062 | 0.1710 | 0.1708 | 0.1664 | 0.2698 | 0.2676 |
| 16311   | 0.1196 | 0.1189 | 0.1188 | 0.1545 | 0.1592 | 0.1481 | 0.1475 | 0.1473 | 0.1987 | 0.2062 |
| 2753    | 0.2134 | 0.2110 | 0.2996 | 0.2059 | 0.2060 | 0.3005 | 0.2967 | 0.4070 | 0.2884 | 0.2883 |
| 3150    | 0.0603 | 0.0538 | 0.0768 | 0.1851 | 0.1811 | 0.0779 | 0.0669 | 0.1006 | 0.2823 | 0.2741 |
| 4171    | 0.1094 | 0.1079 | 0.1100 | 0.1330 | 0.1320 | 0.1423 | 0.1406 | 0.1435 | 0.1785 | 0.1768 |
| 5107    | 0.1349 | 0.1365 | 0.1354 | 0.1505 | 0.1503 | 0.1950 | 0.1984 | 0.1990 | 0.2250 | 0.2245 |
| 5452    | 0.1127 | 0.1100 | 0.1118 | 0.1685 | 0.1695 | 0.1605 | 0.1570 | 0.1598 | 0.2636 | 0.2657 |
| 5603    | 0.0874 | 0.0882 | 0.1103 | 0.1245 | 0.1245 | 0.1473 | 0.1486 | 0.1763 | 0.2229 | 0.2229 |
| 6712    | 0.1160 | 0.1235 | 0.3015 | 0.1381 | 0.1382 | 0.1744 | 0.1833 | 0.4293 | 0.2063 | 0.2064 |
| 7297    | 0.1452 | 0.1419 | 0.1717 | 0.2251 | 0.2241 | 0.1763 | 0.1716 | 0.1939 | 0.2833 | 0.2817 |
| 9474    | 0.0900 | 0.0961 | 0.0944 | 0.2333 | 0.2360 | 0.1150 | 0.1229 | 0.1212 | 0.3814 | 0.3880 |
| 11626   | 0.0998 | 0.0986 | 0.1035 | 0.1910 | 0.1906 | 0.1286 | 0.1273 | 0.1383 | 0.2972 | 0.2963 |
| 12043   | 0.0667 | 0.0668 | 0.0847 | 0.2174 | 0.2148 | 0.0976 | 0.0976 | 0.1305 | 0.4334 | 0.4254 |
| 17184   | 0.1202 | 0.1126 | 0.1096 | 0.2089 | 0.2044 | 0.2261 | 0.2174 | 0.2147 | 0.3294 | 0.3254 |
| 18201   | 0.1996 | 0.1938 | 0.2553 | 0.3349 | 0.3383 | 0.1928 | 0.1895 | 0.2302 | 0.3653 | 0.3707 |
| 20131   | 0.0897 | 0.0863 | 0.1519 | 0.2083 | 0.2060 | 0.1354 | 0.1299 | 0.1930 | 0.3982 | 0.3913 |
| 21148   | 0.0922 | 0.0918 | 0.0933 | 0.0912 | 0.0910 | 0.1085 | 0.1080 | 0.1098 | 0.1072 | 0.1070 |
| 21509   | 0.1223 | 0.1217 | 0.1287 | 0.1568 | 0.1563 | 0.1555 | 0.1547 | 0.1617 | 0.2049 | 0.2040 |
| 22510   | 0.0967 | 0.0988 | 0.1352 | 0.1129 | 0.1129 | 0.1228 | 0.1254 | 0.1558 | 0.1378 | 0.1378 |
| 22809   | 0.1158 | 0.1322 | 0.1245 | 0.2488 | 0.2433 | 0.1166 | 0.1353 | 0.1265 | 0.3008 | 0.2914 |
| 26561   | 0.1558 | 0.1610 | 0.1576 | 0.2250 | 0.2239 | 0.1535 | 0.1559 | 0.1549 | 0.2375 | 0.2359 |
| 28977   | 0.1346 | 0.1371 | 0.1411 | 0.1404 | 0.1406 | 0.1775 | 0.1801 | 0.1877 | 0.1830 | 0.1832 |
| 44981   | 0.1220 | 0.1161 | 0.1141 | 0.1200 | 0.1191 | 0.1237 | 0.1180 | 0.1157 | 0.1202 | 0.1195 |
| 46254   | 0.0943 | 0.0960 | 0.1119 | 0.2688 | 0.2684 | 0.0815 | 0.0832 | 0.1000 | 0.2931 | 0.2924 |
| 49063   | 0.1135 | 0.1136 | 0.1134 | 0.1184 | 0.1183 | 0.1439 | 0.1443 | 0.1449 | 0.1518 | 0.1516 |
| 49232   | 0.0779 | 0.0779 | 0.0828 | 0.1661 | 0.1657 | 0.0862 | 0.0863 | 0.0917 | 0.2060 | 0.2053 |
| 49435   | 0.1090 | 0.1189 | 0.1195 | 0.1938 | 0.1938 | 0.1635 | 0.1785 | 0.1823 | 0.3410 | 0.3410 |
| 50327   | 0.1518 | 0.1506 | 0.1522 | 0.1970 | 0.2006 | 0.2033 | 0.2017 | 0.2022 | 0.2371 | 0.2398 |
| 51324   | 0.1456 | 0.1458 | 0.1498 | 0.3104 | 0.3112 | 0.1661 | 0.1664 | 0.1716 | 0.4547 | 0.4567 |
| 52165   | 0.1190 | 0.1207 | 0.1245 | 0.2384 | 0.2416 | 0.1841 | 0.1900 | 0.1905 | 0.4480 | 0.4575 |
| 52950   | 0.0949 | 0.0835 | 0.1902 | 0.4303 | 0.4317 | 0.0885 | 0.0770 | 0.1279 | 0.5469 | 0.5497 |
| 53795   | 0.0840 | 0.0850 | 0.0850 | 0.1050 | 0.1092 | 0.1964 | 0.2000 | 0.2006 | 0.2564 | 0.2698 |
| 55106   | 0.0697 | 0.0699 | 0.0706 | 0.0736 | 0.0702 | 0.0504 | 0.0505 | 0.0510 | 0.0531 | 0.0507 |
| 55830   | 0.1224 | 0.1360 | 0.1189 | 0.1576 | 0.1603 | 0.1141 | 0.1296 | 0.1111 | 0.1405 | 0.1425 |
| 60195   | 0.1040 | 0.0944 | 0.1270 | 0.2222 | 0.2186 | 0.1428 | 0.1299 | 0.1765 | 0.3586 | 0.3498 |
| 60639   | 0.1013 | 0.1055 | 0.2752 | 0.1668 | 0.1665 | 0.1322 | 0.1359 | 0.3363 | 0.2065 | 0.2061 |
| 63798   | 0.0992 | 0.0991 | 0.0979 | 0.1042 | 0.1054 | 0.0875 | 0.0875 | 0.0864 | 0.0923 | 0.0934 |
| 66207   | 0.1287 | 0.1306 | 0.2005 | 0.1579 | 0.1579 | 0.1646 | 0.1662 | 0.2474 | 0.1937 | 0.1937 |
| 66215   | 0.1486 | 0.1493 | 0.2703 | 0.1788 | 0.1806 | 0.1852 | 0.1860 | 0.3413 | 0.2257 | 0.2284 |

| Tour ID        | MAE           |               |               |               |               | SMAPE         |               |               |               |               |
|----------------|---------------|---------------|---------------|---------------|---------------|---------------|---------------|---------------|---------------|---------------|
|                | SDE           | ARMA          | GARCH         | MA            | ES            | SDE           | ARMA          | GARCH         | MA            | ES            |
| 66287          | 0.1578        | 0.1577        | 0.1552        | 0.2067        | 0.2049        | 0.1423        | 0.1422        | 0.1390        | 0.1918        | 0.1898        |
| 66865          | 0.1044        | 0.1051        | 0.1321        | 0.1086        | 0.1086        | 0.2504        | 0.2521        | 0.3121        | 0.2582        | 0.2582        |
| 69925          | 0.2727        | 0.2302        | 0.2668        | 0.3155        | 0.3170        | 0.1651        | 0.1475        | 0.1803        | 0.2353        | 0.2368        |
| 71821          | 0.0801        | 0.0797        | 0.1093        | 0.0739        | 0.0734        | 0.1337        | 0.1329        | 0.1690        | 0.1225        | 0.1219        |
| 72202          | 0.0664        | 0.0661        | 0.0674        | 0.1065        | 0.1065        | 0.1703        | 0.1697        | 0.1722        | 0.2368        | 0.2368        |
| 72532          | 0.0904        | 0.0901        | 0.0965        | 0.1975        | 0.1975        | 0.1416        | 0.1414        | 0.1521        | 0.3657        | 0.3657        |
| 72603          | 0.0850        | 0.0760        | 0.0990        | 0.1717        | 0.1739        | 0.0647        | 0.0578        | 0.0753        | 0.1364        | 0.1384        |
| 72723          | 0.1227        | 0.1145        | 0.1109        | 0.2005        | 0.2046        | 0.2945        | 0.2774        | 0.2777        | 0.3633        | 0.3670        |
| 72869          | 0.0792        | 0.0791        | 0.0784        | 0.0777        | 0.0777        | 0.0737        | 0.0737        | 0.0730        | 0.0723        | 0.0723        |
| 73163          | 0.1615        | 0.1609        | 0.1576        | 0.1584        | 0.1589        | 0.1604        | 0.1599        | 0.1561        | 0.1571        | 0.1577        |
| 73186          | 0.1632        | 0.1636        | 0.1610        | 0.2677        | 0.2669        | 0.1449        | 0.1452        | 0.1458        | 0.2796        | 0.2784        |
| 74983          | 0.1007        | 0.1073        | 0.1174        | 0.1396        | 0.1416        | 0.1551        | 0.1622        | 0.1716        | 0.1928        | 0.1946        |
| 78546          | 0.1158        | 0.0915        | 0.1912        | 0.4275        | 0.4217        | 0.0690        | 0.0546        | 0.1146        | 0.3325        | 0.3263        |
| 79499          | 0.0894        | 0.0922        | 0.0930        | 0.1116        | 0.1093        | 0.0826        | 0.0852        | 0.0858        | 0.1046        | 0.1022        |
| 79769          | 0.0694        | 0.0700        | 0.0706        | 0.1115        | 0.1043        | 0.0834        | 0.0841        | 0.0848        | 0.1262        | 0.1193        |
| 83878          | 0.1600        | 0.1591        | 0.2076        | 0.1560        | 0.1554        | 0.1311        | 0.1303        | 0.1741        | 0.1277        | 0.1271        |
| 84052          | 0.1341        | 0.1346        | 0.1362        | 0.1412        | 0.1404        | 0.1549        | 0.1554        | 0.1571        | 0.1609        | 0.1604        |
| 93877          | 0.1209        | 0.1197        | 0.1271        | 0.1759        | 0.1763        | 0.2049        | 0.2032        | 0.2190        | 0.3308        | 0.3318        |
| 1605378        | 0.0989        | 0.0988        | 0.1016        | 0.1241        | 0.1241        | 0.0949        | 0.0948        | 0.0974        | 0.1163        | 0.1163        |
| 1605628        | 0.1142        | 0.1131        | 0.1904        | 0.1413        | 0.1414        | 0.1212        | 0.1200        | 0.2023        | 0.1478        | 0.1479        |
| 1607268        | 0.1128        | 0.1126        | 0.1250        | 0.3744        | 0.3716        | 0.0846        | 0.0843        | 0.0969        | 0.3838        | 0.3797        |
| 1608443        | 0.1855        | 0.1751        | 0.1699        | 0.1737        | 0.1732        | 0.2645        | 0.2573        | 0.2498        | 0.2513        | 0.2512        |
| 1609587        | 0.1054        | 0.1055        | 0.1112        | 0.1441        | 0.1435        | 0.0986        | 0.0987        | 0.1041        | 0.1291        | 0.1287        |
| 1612648        | 0.1816        | 0.1720        | 0.1981        | 0.1980        | 0.1980        | 0.3146        | 0.2971        | 0.3583        | 0.3577        | 0.3577        |
| 1614660        | 0.1270        | 0.1214        | 0.2748        | 0.1661        | 0.1665        | 0.2129        | 0.2026        | 0.3079        | 0.2940        | 0.2948        |
| 1617321        | 0.1232        | 0.1230        | 0.1268        | 0.1327        | 0.1331        | 0.1597        | 0.1595        | 0.1647        | 0.1730        | 0.1736        |
| 1620855        | 0.1389        | 0.1399        | 0.1465        | 0.1940        | 0.1885        | 0.1204        | 0.1211        | 0.1268        | 0.1737        | 0.1678        |
| 1621632        | 0.1400        | 0.1399        | 0.1383        | 0.1381        | 0.1382        | 0.1520        | 0.1519        | 0.1502        | 0.1501        | 0.1500        |
| 1621699        | 0.0781        | 0.0782        | 0.2695        | 0.1079        | 0.1073        | 0.1416        | 0.1419        | 0.4370        | 0.2045        | 0.2031        |
| 1623624        | 0.0844        | 0.0853        | 0.0870        | 0.1035        | 0.1035        | 0.1525        | 0.1539        | 0.1564        | 0.1792        | 0.1792        |
| 1624666        | 0.0911        | 0.0862        | 0.1686        | 0.1824        | 0.1796        | 0.1357        | 0.1284        | 0.2342        | 0.3160        | 0.3091        |
| 1633110        | 0.2645        | 0.1862        | 0.3919        | 0.3691        | 0.3713        | 0.2165        | 0.1637        | 0.3611        | 0.3389        | 0.3421        |
| 85207          | 0.1115        | 0.1040        | 0.1039        | 0.1525        | 0.1493        | 0.2493        | 0.2198        | 0.2218        | 0.3665        | 0.3555        |
| 85282          | 0.1290        | 0.1376        | 0.1407        | 0.1416        | 0.1416        | 0.2233        | 0.2347        | 0.2425        | 0.2372        | 0.2372        |
| 93804          | 0.1013        | 0.1015        | 0.1316        | 0.1055        | 0.1049        | 0.1406        | 0.1410        | 0.1748        | 0.1472        | 0.1463        |
| 60051          | 0.1224        | 0.1245        | 0.1215        | 0.1253        | 0.1246        | 0.1075        | 0.1092        | 0.1063        | 0.1089        | 0.1084        |
| 44248          | 0.1092        | 0.1153        | 0.1498        | 0.2058        | 0.2085        | 0.0922        | 0.0968        | 0.1235        | 0.1741        | 0.1767        |
| 69982          | 0.1062        | 0.1116        | 0.1402        | 0.2246        | 0.2257        | 0.1062        | 0.1115        | 0.1397        | 0.2450        | 0.2466        |
| 76106          | 0.1279        | 0.1498        | 0.1283        | 0.1268        | 0.1269        | 0.2242        | 0.2807        | 0.2283        | 0.2252        | 0.2256        |
| 1601410        | 0.0749        | 0.0751        | 0.0711        | 0.0833        | 0.0878        | 0.0897        | 0.0899        | 0.0852        | 0.1008        | 0.1068        |
| 11869          | 0.1232        | 0.1231        | 0.1517        | 0.1439        | 0.1446        | 0.1910        | 0.1912        | 0.2155        | 0.2292        | 0.2303        |
| 78511          | 0.1001        | 0.0997        | 0.1025        | 0.1375        | 0.1335        | 0.0999        | 0.0996        | 0.1014        | 0.1283        | 0.1254        |
| 82421          | 0.1034        | 0.1149        | 0.1123        | 0.1536        | 0.1480        | 0.0881        | 0.0978        | 0.0961        | 0.1351        | 0.1294        |
| 15618          | 0.0604        | 0.0586        | 0.2802        | 0.1003        | 0.0978        | 0.0663        | 0.0644        | 0.2481        | 0.1021        | 0.0999        |
| 36953          | 0.1311        | 0.1327        | 0.1213        | 0.1262        | 0.1255        | 0.2307        | 0.2372        | 0.2194        | 0.2302        | 0.2287        |
| 66666          | 0.1476        | 0.1367        | 0.1406        | 0.1545        | 0.1528        | 0.1195        | 0.1109        | 0.1137        | 0.1261        | 0.1246        |
| 94870          | 0.1000        | 0.1019        | 0.0844        | 0.0908        | 0.0885        | 0.1416        | 0.1454        | 0.1211        | 0.1309        | 0.1271        |
| 91836          | 0.1256        | 0.1316        | 0.1966        | 0.1339        | 0.1348        | 0.1175        | 0.1222        | 0.1738        | 0.1284        | 0.1295        |
| 22349          | 0.1360        | 0.0953        | 0.1317        | 0.1627        | 0.1623        | 0.1441        | 0.1042        | 0.1447        | 0.1880        | 0.1874        |
| 83648          | 0.1486        | 0.1487        | 0.1518        | 0.1493        | 0.1493        | 0.1973        | 0.1983        | 0.1969        | 0.2006        | 0.2006        |
| 44983          | 0.1432        | 0.1465        | 0.1565        | 0.3207        | 0.3135        | 0.1367        | 0.1455        | 0.1538        | 0.4123        | 0.3978        |
| 71801          | 0.0796        | 0.0812        | 0.0828        | 0.0922        | 0.0949        | 0.1472        | 0.1499        | 0.1492        | 0.1610        | 0.1644        |
| 58776          | 0.1243        | 0.1189        | 0.1217        | 0.1250        | 0.1239        | 0.1626        | 0.1558        | 0.1563        | 0.1658        | 0.1642        |
| 74359          | 0.0462        | 0.0460        | 0.0444        | 0.1041        | 0.1018        | 0.0538        | 0.0536        | 0.0517        | 0.1311        | 0.1278        |
| 1603059        | 0.0833        | 0.0834        | 0.1697        | 0.0955        | 0.0955        | 0.1274        | 0.1276        | 0.2295        | 0.1486        | 0.1486        |
| 76500          | 0.0881        | 0.0878        | 0.1032        | 0.1465        | 0.1435        | 0.1643        | 0.1638        | 0.1862        | 0.2300        | 0.2272        |
| 66306          | 0.1239        | 0.0894        | 0.1654        | 0.3380        | 0.3372        | 0.0808        | 0.0620        | 0.1070        | 0.1991        | 0.1988        |
| 1626293        | 0.1449        | 0.1449        | 0.1440        | 0.1440        | 0.1435        | 0.1490        | 0.1491        | 0.1474        | 0.1486        | 0.1480        |
| 1629646        | 0.1061        | 0.1001        | 0.2070        | 0.5340        | 0.5363        | 0.1062        | 0.0980        | 0.2067        | 0.3500        | 0.3510        |
| 90928          | 0.1435        | 0.1481        | 0.1939        | 0.2113        | 0.2110        | 0.1245        | 0.1289        | 0.1574        | 0.1710        | 0.1708        |
| <b>average</b> | <b>0.1182</b> | <b>0.1163</b> | <b>0.1414</b> | <b>0.1750</b> | <b>0.1745</b> | <b>0.1569</b> | <b>0.1561</b> | <b>0.1826</b> | <b>0.2372</b> | <b>0.2367</b> |

Table 4-4: Out-of-Sample Predictive Performance Results (RMSE)

| Tour ID | Long Term |        |        |        |        |        | Short Term |        |        |        |        |        |
|---------|-----------|--------|--------|--------|--------|--------|------------|--------|--------|--------|--------|--------|
|         | SDE       | ARMA   | GARCH  | MA     | ES     | NM     | SDE        | ARMA   | GARCH  | MA     | ES     | NM     |
| 5106    | 0.1742    | 0.1887 | 0.1767 | 0.1696 | 0.1696 | 0.1888 | 0.1705     | 0.1577 | 0.2128 | 0.1972 | 0.1951 | 0.1910 |
| 72528   | 0.1543    | 0.1538 | 0.1658 | 0.1510 | 0.1519 | 0.1520 | 0.0700     | 0.0677 | 0.1244 | 0.0878 | 0.0870 | 0.0849 |
| 73154   | 0.2000    | 0.2023 | 0.2117 | 0.2566 | 0.2508 | 0.2005 | 0.1493     | 0.1772 | 0.1318 | 0.1710 | 0.1700 | 0.1370 |
| 80961   | 0.1594    | 0.1429 | 0.1527 | 0.2658 | 0.2634 | 0.1443 | 0.1364     | 0.1776 | 0.0843 | 0.1719 | 0.1681 | 0.1151 |
| 29336   | 0.1841    | 0.1889 | 0.2173 | 0.1763 | 0.1763 | 0.1913 | 0.0917     | 0.0727 | 0.0755 | 0.1027 | 0.1014 | 0.0723 |
| 23222   | 0.2073    | 0.2083 | 0.2635 | 0.3572 | 0.3703 | 0.2397 | 0.1715     | 0.1630 | 0.2967 | 0.3440 | 0.3403 | 0.2617 |
| 30938   | 0.1619    | 0.1611 | 0.2935 | 0.1567 | 0.1561 | 0.1576 | 0.0846     | 0.0819 | 1.8221 | 0.0961 | 0.0959 | 0.0806 |
| 71480   | 0.1525    | 0.1399 | 0.1429 | 0.2304 | 0.2300 | 0.1411 | 0.0811     | 0.0527 | 0.0618 | 0.0991 | 0.0980 | 0.0710 |
| 88292   | 0.1787    | 0.1325 | 0.1528 | 0.2531 | 0.2580 | 0.1295 | 0.0662     | 0.0493 | 0.0701 | 0.0910 | 0.0888 | 0.0494 |
| 1618693 | 0.1759    | 0.1727 | 0.1809 | 0.2255 | 0.2288 | 0.1716 | 0.0263     | 0.0625 | 0.1125 | 0.0248 | 0.0243 | 0.1411 |
| 56737   | 0.1624    | 0.2029 | 0.2021 | 0.2128 | 0.2198 | 0.1841 | 0.1415     | 0.1919 | 0.2786 | 0.1720 | 0.1704 | 0.2418 |
| 71478   | 0.1776    | 0.1741 | 0.3678 | 0.1363 | 0.1394 | 0.1971 | 0.1207     | 0.1207 | 1.4871 | 0.1421 | 0.1411 | 0.2248 |
| 49049   | 0.3122    | 0.2362 | 0.2850 | 0.2955 | 0.2970 | 0.2470 | 0.1311     | 0.2439 | 1.9452 | 0.1452 | 0.1439 | 0.2219 |
| 72526   | 0.1736    | 0.1718 | 0.3175 | 0.1872 | 0.1850 | 0.1677 | 0.1042     | 0.1127 | 1.6985 | 0.1088 | 0.1068 | 0.1917 |
| 32391   | 0.1556    | 0.1764 | 0.1631 | 0.2414 | 0.2436 | 0.1564 | 0.0709     | 0.2248 | 0.0826 | 0.0836 | 0.0834 | 0.0994 |
| 72527   | 0.1618    | 0.1728 | 0.3190 | 0.1561 | 0.1556 | 0.2001 | 0.1127     | 0.0915 | 1.4054 | 0.1105 | 0.1102 | 0.1300 |
| 69278   | 0.1965    | 0.2000 | 0.2237 | 0.2048 | 0.2017 | 0.2056 | 0.1419     | 0.1370 | 0.1200 | 0.1581 | 0.1581 | 0.1303 |
| 28245   | 0.1823    | 0.1833 | 0.2044 | 0.1788 | 0.1787 | 0.1788 | 0.1961     | 0.1937 | 0.3396 | 0.2086 | 0.2067 | 0.2586 |
| 30814   | 0.1393    | 0.1397 | 0.1061 | 0.2027 | 0.2019 | 0.1388 | 0.1676     | 0.1711 | 0.1524 | 0.2019 | 0.1997 | 0.2035 |
| 16311   | 0.1669    | 0.1697 | 0.1729 | 0.1944 | 0.1949 | 0.1667 | 0.0622     | 0.0595 | 0.0681 | 0.0694 | 0.0688 | 0.0541 |
| 2753    | 0.2854    | 0.2519 | 0.3369 | 0.3436 | 0.3436 | 0.1758 | 0.1746     | 0.1635 | 1.7875 | 0.2184 | 0.2162 | 0.1245 |
| 3150    | 0.1049    | 0.0968 | 0.1125 | 0.0943 | 0.0921 | 0.1248 | 0.0944     | 0.1034 | 0.1319 | 0.1040 | 0.1030 | 0.1478 |
| 4171    | 0.1462    | 0.4089 | 0.2347 | 0.2394 | 0.2402 | 0.2225 | 0.1678     | 0.4182 | 0.3939 | 0.2325 | 0.2315 | 0.3675 |
| 5107    | 0.1888    | 0.2070 | 0.2438 | 0.2053 | 0.2008 | 0.2081 | 0.1089     | 0.2359 | 0.2132 | 0.1088 | 0.1082 | 0.1589 |
| 5452    | 0.1663    | 0.1767 | 0.1852 | 0.2115 | 0.2115 | 0.1666 | 0.0654     | 0.0607 | 0.0672 | 0.0741 | 0.0738 | 0.0539 |
| 5603    | 0.2693    | 0.2685 | 0.3466 | 0.2626 | 0.2675 | 0.2678 | 0.3099     | 0.3094 | 1.8491 | 0.3317 | 0.3306 | 0.3116 |
| 6712    | 0.1827    | 0.6316 | 0.4906 | 0.2023 | 0.2075 | 0.2448 | 0.1999     | 0.3687 | 1.3335 | 0.2107 | 0.2095 | 0.2732 |
| 7297    | 0.3237    | 0.3074 | 0.4024 | 0.4526 | 0.4537 | 0.3200 | 0.0778     | 0.0696 | 2.1536 | 0.1271 | 0.1260 | 0.1854 |
| 9474    | 0.1482    | 0.1521 | 0.1491 | 0.1619 | 0.1608 | 0.1492 | 0.1534     | 0.1352 | 0.1512 | 0.2117 | 0.2099 | 0.1503 |
| 11626   | 0.0924    | 0.0985 | 0.1394 | 0.0860 | 0.0863 | 0.1159 | 0.0856     | 0.0890 | 0.1279 | 0.0985 | 0.0979 | 0.1044 |
| 12043   | 0.1016    | 0.1054 | 0.1109 | 0.1095 | 0.1107 | 0.1239 | 0.1093     | 0.1086 | 0.1016 | 0.1547 | 0.1540 | 0.1056 |
| 17184   | 0.1548    | 0.1519 | 0.1639 | 0.1377 | 0.1372 | 0.1479 | 0.1189     | 0.1051 | 0.0937 | 0.1169 | 0.1173 | 0.0878 |
| 18201   | 0.1032    | 0.1186 | 0.4694 | 0.1983 | 0.1945 | 0.2377 | 0.1083     | 0.0974 | 2.4380 | 0.1682 | 0.1661 | 0.2197 |
| 20131   | 0.1467    | 0.1688 | 0.2761 | 0.3086 | 0.3072 | 0.1054 | 0.1348     | 0.1421 | 1.4164 | 0.1840 | 0.1817 | 0.1157 |
| 21148   | 0.2881    | 0.2836 | 0.3072 | 0.3804 | 0.3834 | 0.2778 | 0.1669     | 0.1633 | 0.1802 | 0.2136 | 0.2121 | 0.1672 |
| 21509   | 0.3038    | 0.2990 | 0.2651 | 0.4282 | 0.4314 | 0.2870 | 0.1498     | 0.1446 | 0.1476 | 0.1979 | 0.1969 | 0.1459 |
| 22510   | 0.0819    | 0.0835 | 0.3513 | 0.2133 | 0.2133 | 0.1231 | 0.0631     | 0.0544 | 1.7399 | 0.1404 | 0.1389 | 0.1083 |
| 22809   | 0.1735    | 0.1389 | 0.1387 | 0.2394 | 0.2370 | 0.1289 | 0.1627     | 0.2578 | 0.1767 | 0.1843 | 0.1815 | 0.1578 |
| 26561   | 0.1531    | 0.1808 | 0.1644 | 0.1836 | 0.1806 | 0.1510 | 0.0927     | 0.2425 | 0.0748 | 0.0923 | 0.0912 | 0.1124 |
| 28977   | 0.2475    | 0.2397 | 0.2983 | 0.1975 | 0.1981 | 0.2508 | 0.1268     | 0.1251 | 0.2639 | 0.1411 | 0.1401 | 0.2008 |
| 44981   | 0.1061    | 0.1382 | 0.1652 | 0.1484 | 0.1422 | 0.1385 | 0.0707     | 0.1807 | 0.1495 | 0.0887 | 0.0873 | 0.1200 |
| 46254   | 0.1090    | 0.1088 | 0.1146 | 0.1535 | 0.1568 | 0.1170 | 0.0597     | 0.0605 | 0.0784 | 0.0743 | 0.0741 | 0.0880 |
| 49063   | 0.1994    | 0.1949 | 0.2108 | 0.2863 | 0.2781 | 0.2008 | 0.1362     | 0.1284 | 0.1084 | 0.1975 | 0.1937 | 0.1165 |
| 49232   | 0.1981    | 0.1964 | 0.1891 | 0.2914 | 0.2855 | 0.1859 | 0.2176     | 0.2231 | 0.3138 | 0.2812 | 0.2784 | 0.3014 |
| 49435   | 0.1849    | 0.1908 | 0.1790 | 0.2834 | 0.2830 | 0.1732 | 0.1465     | 0.2279 | 0.1548 | 0.1839 | 0.1835 | 0.1587 |
| 50327   | 0.1771    | 0.1780 | 0.1942 | 0.1579 | 0.1584 | 0.1859 | 0.0792     | 0.0691 | 0.0858 | 0.1066 | 0.1056 | 0.0784 |
| 51324   | 0.1803    | 0.1747 | 0.1702 | 0.4068 | 0.4011 | 0.1634 | 0.1017     | 0.0980 | 0.0702 | 0.1477 | 0.1435 | 0.0814 |
| 52165   | 0.2529    | 0.2694 | 0.2721 | 0.2648 | 0.2619 | 0.2743 | 0.1347     | 0.2002 | 0.2796 | 0.1534 | 0.1525 | 0.2819 |
| 52950   | 0.2311    | 0.2536 | 0.4703 | 0.2203 | 0.2194 | 0.2726 | 0.1732     | 0.1626 | 2.1436 | 0.2008 | 0.1997 | 0.1403 |
| 53795   | 0.2546    | 0.2694 | 0.2852 | 0.2019 | 0.2039 | 0.2634 | 0.2379     | 0.2506 | 0.3010 | 0.2340 | 0.2327 | 0.2765 |
| 55106   | 0.1103    | 0.1105 | 0.1192 | 0.1295 | 0.1255 | 0.1104 | 0.1047     | 0.1018 | 0.1063 | 0.1094 | 0.1099 | 0.0989 |
| 55830   | 0.1910    | 0.2017 | 0.2001 | 0.1848 | 0.1838 | 0.1985 | 0.1935     | 0.1830 | 0.2516 | 0.2494 | 0.2476 | 0.2491 |
| 60195   | 0.1675    | 0.1531 | 0.1701 | 0.1908 | 0.1921 | 0.1696 | 0.0764     | 0.1902 | 0.1404 | 0.0769 | 0.0765 | 0.1622 |
| 60639   | 0.2977    | 0.2864 | 0.2807 | 0.3123 | 0.3171 | 0.1915 | 0.2482     | 0.2419 | 1.4199 | 0.2393 | 0.2369 | 0.1748 |
| 63798   | 0.2270    | 0.2224 | 0.1917 | 0.3289 | 0.3272 | 0.2131 | 0.0861     | 0.0891 | 0.0896 | 0.1031 | 0.1019 | 0.1115 |
| 66207   | 0.1639    | 0.1596 | 0.4331 | 0.1618 | 0.1612 | 0.1531 | 0.1216     | 0.1201 | 1.2345 | 0.1440 | 0.1419 | 0.0980 |
| 66215   | 0.1390    | 0.1412 | 0.5379 | 0.1159 | 0.1159 | 0.1609 | 0.1174     | 0.1207 | 1.7633 | 0.1206 | 0.1197 | 0.1890 |

| Tour ID        | Long Term     |               |               |               |               |               | Short Term    |               |               |               |               |               |
|----------------|---------------|---------------|---------------|---------------|---------------|---------------|---------------|---------------|---------------|---------------|---------------|---------------|
|                | SDE           | ARMA          | GARCH         | MA            | ES            | NM            | SDE           | ARMA          | GARCH         | MA            | ES            | NM            |
| 66287          | 0.2069        | 0.2062        | 0.2086        | 0.2025        | 0.2025        | 0.2041        | 0.1425        | 0.1408        | 0.1367        | 0.1584        | 0.1587        | 0.1304        |
| 66865          | 0.2186        | 0.2154        | 0.3126        | 0.2873        | 0.2886        | 0.1980        | 0.1204        | 0.1187        | 0.9954        | 0.1407        | 0.1395        | 0.1100        |
| 69925          | 0.6241        | 0.4391        | 0.7389        | 0.5263        | 0.5290        | 0.2546        | 0.2744        | 0.2369        | 2.7712        | 0.2905        | 0.2853        | 0.1737        |
| 71821          | 0.0953        | 0.0871        | 0.1695        | 0.1577        | 0.1555        | 0.0844        | 0.0644        | 0.0608        | 1.6072        | 0.0785        | 0.0778        | 0.0611        |
| 72202          | 0.0858        | 0.0803        | 0.0889        | 0.1818        | 0.1736        | 0.0885        | 0.0817        | 0.0754        | 0.0854        | 0.1237        | 0.1225        | 0.0853        |
| 72532          | 0.1643        | 0.1646        | 0.1659        | 0.1728        | 0.1713        | 0.1662        | 0.2647        | 0.2629        | 0.2611        | 0.3000        | 0.2984        | 0.2622        |
| 72603          | 0.0803        | 0.2313        | 0.0761        | 0.0943        | 0.0985        | 0.0776        | 0.0822        | 0.1206        | 0.0785        | 0.1053        | 0.1043        | 0.0649        |
| 72723          | 0.1926        | 0.1841        | 0.1905        | 0.2067        | 0.2046        | 0.1926        | 0.1448        | 0.1664        | 0.2969        | 0.1415        | 0.1410        | 0.3013        |
| 72869          | 0.2039        | 0.2033        | 0.2010        | 0.2039        | 0.2040        | 0.2023        | 0.1719        | 0.1931        | 0.2827        | 0.2272        | 0.2255        | 0.2880        |
| 73163          | 0.1319        | 0.1349        | 0.1665        | 0.1913        | 0.1949        | 0.1315        | 0.1517        | 0.1523        | 0.1581        | 0.2024        | 0.2015        | 0.1608        |
| 73186          | 0.0702        | 0.0694        | 0.0859        | 0.1367        | 0.1370        | 0.0922        | 0.0681        | 0.0679        | 0.0580        | 0.0797        | 0.0792        | 0.0914        |
| 74983          | 0.1730        | 0.1449        | 0.1150        | 0.1812        | 0.1808        | 0.1794        | 0.1474        | 0.1266        | 0.1417        | 0.1338        | 0.1319        | 0.2184        |
| 78546          | 0.2627        | 0.2027        | 0.6174        | 0.3787        | 0.3805        | 0.1702        | 0.1170        | 0.2537        | 2.3775        | 0.1789        | 0.1760        | 0.1166        |
| 79499          | 0.2173        | 0.2332        | 0.2645        | 0.1573        | 0.1568        | 0.2423        | 0.2245        | 0.2559        | 0.2913        | 0.1528        | 0.1511        | 0.2685        |
| 79769          | 0.2347        | 0.2373        | 0.2307        | 0.4336        | 0.4374        | 0.2369        | 0.1284        | 0.1300        | 0.1314        | 0.1996        | 0.1973        | 0.1353        |
| 83878          | 0.2887        | 0.2624        | 0.4346        | 0.4322        | 0.4334        | 0.2372        | 0.1629        | 0.1574        | 1.9957        | 0.1796        | 0.1793        | 0.1975        |
| 84052          | 0.2293        | 0.2300        | 0.2325        | 0.2830        | 0.2827        | 0.2323        | 0.0808        | 0.0832        | 0.1329        | 0.0834        | 0.0835        | 0.1439        |
| 93877          | 0.2173        | 0.2167        | 0.2492        | 0.2941        | 0.2899        | 0.2119        | 0.1684        | 0.1696        | 0.2075        | 0.1852        | 0.1837        | 0.1738        |
| 1605378        | 0.1229        | 0.1228        | 0.1248        | 0.1374        | 0.1361        | 0.1236        | 0.1035        | 0.1037        | 0.0991        | 0.1274        | 0.1266        | 0.0992        |
| 1605628        | 0.2128        | 0.2567        | 0.6030        | 0.1881        | 0.1897        | 0.1451        | 0.1460        | 0.1670        | 1.5917        | 0.1408        | 0.1398        | 0.1315        |
| 1607268        | 0.2219        | 0.2291        | 0.1641        | 0.3059        | 0.3084        | 0.1780        | 0.2341        | 0.2342        | 0.2024        | 0.2617        | 0.2593        | 0.2243        |
| 1608443        | 0.1613        | 0.1467        | 0.1363        | 0.1876        | 0.1854        | 0.1234        | 0.0873        | 0.0666        | 0.1732        | 0.1253        | 0.1219        | 0.1509        |
| 1609587        | 0.1364        | 0.1368        | 0.1352        | 0.1387        | 0.1376        | 0.1395        | 0.1148        | 0.1134        | 0.1495        | 0.1486        | 0.1474        | 0.1139        |
| 1612648        | 0.1807        | 0.1474        | 0.2089        | 0.2089        | 0.2089        | 0.1388        | 0.1908        | 0.1585        | 0.2442        | 0.2188        | 0.2167        | 0.1459        |
| 1614660        | 0.4574        | 0.4004        | 0.6023        | 0.5881        | 0.5838        | 0.3724        | 0.4233        | 0.4161        | 1.8022        | 0.5052        | 0.4977        | 0.4161        |
| 1617321        | 0.2534        | 0.2588        | 0.3003        | 0.2066        | 0.2072        | 0.2667        | 0.1057        | 0.1023        | 0.0975        | 0.1409        | 0.1397        | 0.0977        |
| 1620855        | 0.1859        | 0.1839        | 0.1776        | 0.2471        | 0.2374        | 0.1823        | 0.1469        | 0.1490        | 0.2420        | 0.2047        | 0.2015        | 0.2479        |
| 1621632        | 0.3065        | 0.3072        | 0.3059        | 0.2494        | 0.2509        | 0.3086        | 0.1690        | 0.1717        | 0.3077        | 0.1917        | 0.1908        | 0.3110        |
| 1621699        | 0.2632        | 0.2682        | 0.4541        | 0.2345        | 0.2345        | 0.2891        | 0.2580        | 0.2648        | 1.4636        | 0.2454        | 0.2427        | 0.3108        |
| 1623624        | 0.3007        | 0.2987        | 0.3148        | 0.3047        | 0.3027        | 0.2986        | 0.0696        | 0.0670        | 0.0730        | 0.0721        | 0.0725        | 0.0648        |
| 1624666        | 0.0506        | 0.0405        | 0.4172        | 0.1179        | 0.1245        | 0.0776        | 0.0507        | 0.0439        | 1.3346        | 0.0992        | 0.0983        | 0.0693        |
| 1633110        | 0.4694        | 0.2770        | 0.4884        | 0.4675        | 0.4692        | 0.2077        | 0.1558        | 0.3194        | 2.0136        | 0.2588        | 0.2535        | 0.1837        |
| 85207          | 0.2248        | 0.2088        | 0.2194        | 0.2404        | 0.2408        | 0.2080        | 0.1804        | 0.1804        | 0.2175        | 0.2061        | 0.2040        | 0.2021        |
| 85282          | 0.0888        | 0.0821        | 0.0976        | 0.1066        | 0.1069        | 0.0806        | 0.1071        | 0.0970        | 0.1335        | 0.1183        | 0.1173        | 0.0961        |
| 93804          | 0.1467        | 0.1450        | 0.3351        | 0.1378        | 0.1408        | 0.1418        | 0.1335        | 0.1378        | 1.6618        | 0.1452        | 0.1440        | 0.1667        |
| 60051          | 0.1620        | 0.1764        | 0.1704        | 0.2040        | 0.1982        | 0.2005        | 0.0990        | 0.1038        | 0.1546        | 0.1415        | 0.1395        | 0.1837        |
| 44248          | 0.2077        | 0.2035        | 0.2104        | 0.2588        | 0.2549        | 0.1873        | 0.1835        | 0.1809        | 0.1963        | 0.1840        | 0.1818        | 0.1720        |
| 69982          | 0.2046        | 0.1978        | 0.2440        | 0.2144        | 0.2125        | 0.2456        | 0.2175        | 0.1922        | 0.2636        | 0.2601        | 0.2600        | 0.2627        |
| 76106          | 0.1112        | 0.1232        | 0.1034        | 0.1087        | 0.1083        | 0.1277        | 0.1251        | 0.1207        | 0.1276        | 0.1619        | 0.1608        | 0.1137        |
| 1601410        | 0.1486        | 0.1503        | 0.1741        | 0.1907        | 0.1927        | 0.1746        | 0.1420        | 0.1436        | 0.1620        | 0.2454        | 0.2434        | 0.1594        |
| 11869          | 0.1227        | 0.1260        | 0.2429        | 0.1617        | 0.1657        | 0.1602        | 0.0865        | 0.0855        | 2.2413        | 0.1041        | 0.1039        | 0.1472        |
| 78511          | 0.1640        | 0.1633        | 0.1883        | 0.2446        | 0.2482        | 0.1698        | 0.1684        | 0.1684        | 0.2077        | 0.1998        | 0.1982        | 0.1754        |
| 82421          | 0.1497        | 0.1627        | 0.1583        | 0.1605        | 0.1600        | 0.1590        | 0.1141        | 0.1163        | 0.1320        | 0.1241        | 0.1219        | 0.1245        |
| 15618          | 0.0974        | 0.1169        | 0.5780        | 0.0683        | 0.0649        | 0.1007        | 0.0840        | 0.1031        | 2.0493        | 0.0758        | 0.0737        | 0.0894        |
| 36953          | 0.1188        | 0.0947        | 0.0873        | 0.1526        | 0.1538        | 0.0861        | 0.0955        | 0.1724        | 0.0758        | 0.1131        | 0.1127        | 0.0734        |
| 66666          | 0.1431        | 0.1355        | 0.1721        | 0.3002        | 0.3103        | 0.1741        | 0.1394        | 0.1280        | 0.1565        | 0.2411        | 0.2386        | 0.1782        |
| 94870          | 0.0943        | 0.0937        | 0.1103        | 0.1031        | 0.1031        | 0.1009        | 0.0694        | 0.0715        | 0.1045        | 0.1096        | 0.1104        | 0.0890        |
| 91836          | 0.2429        | 0.2740        | 0.4799        | 0.4809        | 0.4809        | 0.3285        | 0.2514        | 0.2715        | 2.1027        | 0.4037        | 0.4016        | 0.3638        |
| 22349          | 0.0797        | 0.2870        | 0.2259        | 0.0758        | 0.0760        | 0.1463        | 0.0828        | 0.2444        | 0.2304        | 0.0874        | 0.0876        | 0.1505        |
| 83648          | 0.1549        | 0.1633        | 0.1901        | 0.1892        | 0.1913        | 0.2234        | 0.1733        | 0.1485        | 0.2200        | 0.2719        | 0.2695        | 0.2799        |
| 44983          | 0.0831        | 0.0941        | 0.1520        | 0.1154        | 0.1134        | 0.0939        | 0.0686        | 0.2590        | 0.1395        | 0.0850        | 0.0843        | 0.0734        |
| 71801          | 0.2000        | 0.1995        | 0.1903        | 0.1918        | 0.1923        | 0.1986        | 0.0814        | 0.1299        | 0.1703        | 0.1124        | 0.1116        | 0.1242        |
| 58776          | 0.0825        | 0.0805        | 0.0819        | 0.1541        | 0.1472        | 0.0796        | 0.0850        | 0.0843        | 0.0602        | 0.1196        | 0.1177        | 0.0911        |
| 74359          | 0.1024        | 0.1025        | 0.1050        | 0.1049        | 0.1061        | 0.1011        | 0.0811        | 0.0846        | 0.1021        | 0.0655        | 0.0649        | 0.0981        |
| 1603059        | 0.1699        | 0.1671        | 0.4399        | 0.2413        | 0.2373        | 0.1544        | 0.1110        | 0.1106        | 1.8106        | 0.1042        | 0.1025        | 0.1204        |
| 76500          | 0.1580        | 0.1573        | 0.1546        | 0.1844        | 0.1820        | 0.1530        | 0.0895        | 0.0890        | 0.1022        | 0.1116        | 0.1115        | 0.1062        |
| 66306          | 0.1375        | 0.2400        | 0.1455        | 0.1480        | 0.1492        | 0.1951        | 0.1114        | 0.2091        | 0.1341        | 0.1455        | 0.1447        | 0.1920        |
| 1626293        | 0.2078        | 0.2372        | 0.2690        | 0.2117        | 0.2106        | 0.3123        | 0.1583        | 0.1646        | 0.2550        | 0.1964        | 0.1944        | 0.3011        |
| 1629646        | 0.5209        | 0.5175        | 0.4529        | 0.5404        | 0.5434        | 0.2433        | 0.2680        | 0.2689        | 1.6918        | 0.3803        | 0.3755        | 0.2910        |
| 90928          | 0.1954        | 0.2071        | 0.6585        | 0.3831        | 0.3884        | 0.2564        | 0.2028        | 0.2279        | 2.3289        | 0.2624        | 0.2611        | 0.2509        |
| <b>average</b> | <b>0.1878</b> | <b>0.1937</b> | <b>0.2505</b> | <b>0.2267</b> | <b>0.2267</b> | <b>0.1830</b> | <b>0.1353</b> | <b>0.1547</b> | <b>0.6251</b> | <b>0.1648</b> | <b>0.1634</b> | <b>0.1642</b> |

Table 4-5: Out-of-Sample Predictive Performance Results (MAE)

| Tour ID | Long Term |        |        |        |        |        | Short Term |        |        |        |        |        |
|---------|-----------|--------|--------|--------|--------|--------|------------|--------|--------|--------|--------|--------|
|         | SDE       | ARMA   | GARCH  | MA     | ES     | NM     | SDE        | ARMA   | GARCH  | MA     | ES     | NM     |
| 5106    | 0.1388    | 0.1504 | 0.1408 | 0.1385 | 0.1385 | 0.1500 | 0.1299     | 0.1287 | 0.2026 | 0.1620 | 0.1592 | 0.1808 |
| 72528   | 0.1193    | 0.1181 | 0.1301 | 0.1147 | 0.1145 | 0.1148 | 0.0548     | 0.0520 | 0.1108 | 0.0766 | 0.0758 | 0.0637 |
| 73154   | 0.1582    | 0.1620 | 0.1679 | 0.2086 | 0.2028 | 0.1582 | 0.1243     | 0.1533 | 0.1112 | 0.1485 | 0.1472 | 0.1146 |
| 80961   | 0.1334    | 0.1160 | 0.1185 | 0.2369 | 0.2345 | 0.1181 | 0.1197     | 0.1600 | 0.0674 | 0.1569 | 0.1532 | 0.1043 |
| 29336   | 0.1350    | 0.1379 | 0.1588 | 0.1324 | 0.1324 | 0.1391 | 0.0762     | 0.0578 | 0.0623 | 0.0891 | 0.0877 | 0.0530 |
| 23222   | 0.1594    | 0.1615 | 0.1824 | 0.3256 | 0.3370 | 0.1704 | 0.1486     | 0.1414 | 0.2459 | 0.3034 | 0.2990 | 0.2125 |
| 30938   | 0.1370    | 0.1358 | 0.2074 | 0.1287 | 0.1277 | 0.1299 | 0.0730     | 0.0709 | 1.3207 | 0.0857 | 0.0854 | 0.0666 |
| 71480   | 0.1226    | 0.1169 | 0.1131 | 0.1883 | 0.1878 | 0.1187 | 0.0678     | 0.0430 | 0.0481 | 0.0869 | 0.0857 | 0.0599 |
| 88292   | 0.1514    | 0.1007 | 0.1121 | 0.2325 | 0.2374 | 0.0961 | 0.0539     | 0.0391 | 0.0614 | 0.0805 | 0.0783 | 0.0382 |
| 1618693 | 0.1390    | 0.1376 | 0.1439 | 0.1766 | 0.1793 | 0.1370 | 0.0167     | 0.0569 | 0.1120 | 0.0128 | 0.0123 | 0.1399 |
| 56737   | 0.1299    | 0.1503 | 0.1545 | 0.1764 | 0.1832 | 0.1422 | 0.1187     | 0.1744 | 0.2619 | 0.1511 | 0.1494 | 0.2226 |
| 71478   | 0.1475    | 0.1443 | 0.2558 | 0.1066 | 0.1082 | 0.1670 | 0.1027     | 0.1038 | 1.1529 | 0.1269 | 0.1257 | 0.2074 |
| 49049   | 0.2546    | 0.1941 | 0.2227 | 0.2434 | 0.2448 | 0.2019 | 0.1086     | 0.2203 | 1.4304 | 0.1260 | 0.1245 | 0.2036 |
| 72526   | 0.1466    | 0.1448 | 0.2336 | 0.1610 | 0.1587 | 0.1415 | 0.0870     | 0.0950 | 1.2088 | 0.0974 | 0.0952 | 0.1810 |
| 32391   | 0.1284    | 0.1483 | 0.1379 | 0.2130 | 0.2152 | 0.1301 | 0.0562     | 0.2063 | 0.0709 | 0.0668 | 0.0668 | 0.0881 |
| 72527   | 0.1241    | 0.1302 | 0.2050 | 0.1246 | 0.1240 | 0.1486 | 0.0890     | 0.0750 | 0.9763 | 0.0877 | 0.0873 | 0.1152 |
| 69278   | 0.1568    | 0.1604 | 0.1843 | 0.1654 | 0.1623 | 0.1661 | 0.1155     | 0.1109 | 0.0979 | 0.1345 | 0.1340 | 0.1071 |
| 28245   | 0.1490    | 0.1496 | 0.1651 | 0.1470 | 0.1469 | 0.1462 | 0.1653     | 0.1635 | 0.3167 | 0.1821 | 0.1800 | 0.2298 |
| 30814   | 0.1096    | 0.1106 | 0.0864 | 0.1751 | 0.1741 | 0.1125 | 0.1463     | 0.1500 | 0.1346 | 0.1799 | 0.1771 | 0.1852 |
| 16311   | 0.1285    | 0.1289 | 0.1285 | 0.1448 | 0.1451 | 0.1286 | 0.0526     | 0.0505 | 0.0587 | 0.0609 | 0.0604 | 0.0484 |
| 2753    | 0.2481    | 0.2237 | 0.2895 | 0.2995 | 0.2995 | 0.1506 | 0.1510     | 0.1411 | 1.3232 | 0.1968 | 0.1941 | 0.1083 |
| 3150    | 0.0850    | 0.0813 | 0.0917 | 0.0809 | 0.0795 | 0.0981 | 0.0830     | 0.0902 | 0.1184 | 0.0862 | 0.0850 | 0.1315 |
| 4171    | 0.1126    | 0.2649 | 0.1608 | 0.2198 | 0.2207 | 0.1570 | 0.1426     | 0.3917 | 0.3631 | 0.2032 | 0.2014 | 0.3357 |
| 5107    | 0.1483    | 0.1655 | 0.1956 | 0.1624 | 0.1576 | 0.1671 | 0.0871     | 0.2124 | 0.2008 | 0.0873 | 0.0865 | 0.1422 |
| 5452    | 0.1319    | 0.1400 | 0.1490 | 0.1740 | 0.1740 | 0.1322 | 0.0543     | 0.0492 | 0.0575 | 0.0640 | 0.0636 | 0.0458 |
| 5603    | 0.2057    | 0.2052 | 0.2600 | 0.2043 | 0.2063 | 0.2063 | 0.2486     | 0.2485 | 1.3256 | 0.2719 | 0.2705 | 0.2547 |
| 6712    | 0.1523    | 0.5813 | 0.4183 | 0.1704 | 0.1763 | 0.2169 | 0.1746     | 0.3378 | 1.0359 | 0.1884 | 0.1877 | 0.2555 |
| 7297    | 0.2477    | 0.2409 | 0.3115 | 0.3647 | 0.3657 | 0.2697 | 0.0653     | 0.0582 | 1.6321 | 0.1125 | 0.1111 | 0.1721 |
| 9474    | 0.1152    | 0.1138 | 0.1157 | 0.1363 | 0.1350 | 0.1149 | 0.1307     | 0.1129 | 0.1354 | 0.1893 | 0.1869 | 0.1344 |
| 11626   | 0.0702    | 0.0776 | 0.1225 | 0.0644 | 0.0647 | 0.0987 | 0.0663     | 0.0712 | 0.1181 | 0.0803 | 0.0797 | 0.0929 |
| 12043   | 0.0763    | 0.0820 | 0.0930 | 0.0835 | 0.0849 | 0.1085 | 0.0862     | 0.0874 | 0.0845 | 0.1303 | 0.1296 | 0.0932 |
| 17184   | 0.1223    | 0.1181 | 0.1288 | 0.1077 | 0.1072 | 0.1157 | 0.0987     | 0.0868 | 0.0754 | 0.0992 | 0.0995 | 0.0740 |
| 18201   | 0.0872    | 0.0986 | 0.3974 | 0.1791 | 0.1756 | 0.2151 | 0.0939     | 0.0818 | 1.7158 | 0.1535 | 0.1513 | 0.1984 |
| 20131   | 0.1215    | 0.1447 | 0.1691 | 0.2908 | 0.2894 | 0.0839 | 0.1122     | 0.1190 | 1.0248 | 0.1619 | 0.1593 | 0.0943 |
| 21148   | 0.2165    | 0.2123 | 0.2402 | 0.3064 | 0.3093 | 0.2189 | 0.1316     | 0.1288 | 0.1498 | 0.1787 | 0.1765 | 0.1323 |
| 21509   | 0.2284    | 0.2240 | 0.2005 | 0.3655 | 0.3688 | 0.2202 | 0.1185     | 0.1136 | 0.1256 | 0.1665 | 0.1651 | 0.1148 |
| 22510   | 0.0689    | 0.0669 | 0.1830 | 0.1934 | 0.1934 | 0.0930 | 0.0527     | 0.0434 | 1.4000 | 0.1286 | 0.1268 | 0.0889 |
| 22809   | 0.1438    | 0.1120 | 0.1158 | 0.2079 | 0.2053 | 0.1091 | 0.1420     | 0.2382 | 0.1610 | 0.1667 | 0.1634 | 0.1434 |
| 26561   | 0.1324    | 0.1583 | 0.1201 | 0.1635 | 0.1611 | 0.1261 | 0.0749     | 0.2190 | 0.0632 | 0.0789 | 0.0775 | 0.0903 |
| 28977   | 0.2023    | 0.1968 | 0.2455 | 0.1674 | 0.1678 | 0.2054 | 0.1120     | 0.1089 | 0.2488 | 0.1254 | 0.1242 | 0.1816 |
| 44981   | 0.0776    | 0.1108 | 0.1427 | 0.1287 | 0.1228 | 0.1149 | 0.0555     | 0.1645 | 0.1403 | 0.0744 | 0.0730 | 0.1096 |
| 46254   | 0.0867    | 0.0858 | 0.0932 | 0.1175 | 0.1211 | 0.0997 | 0.0461     | 0.0473 | 0.0673 | 0.0585 | 0.0581 | 0.0798 |
| 49063   | 0.1787    | 0.1734 | 0.1760 | 0.2404 | 0.2315 | 0.1714 | 0.1169     | 0.1106 | 0.0950 | 0.1750 | 0.1708 | 0.1050 |
| 49232   | 0.1580    | 0.1566 | 0.1497 | 0.2340 | 0.2284 | 0.1467 | 0.1863     | 0.1918 | 0.2781 | 0.2474 | 0.2439 | 0.2642 |
| 49435   | 0.1308    | 0.1365 | 0.1393 | 0.2265 | 0.2260 | 0.1362 | 0.1144     | 0.1916 | 0.1319 | 0.1460 | 0.1455 | 0.1373 |
| 50327   | 0.1527    | 0.1499 | 0.1596 | 0.1363 | 0.1364 | 0.1539 | 0.0661     | 0.0575 | 0.0741 | 0.0938 | 0.0927 | 0.0667 |
| 51324   | 0.1472    | 0.1428 | 0.1308 | 0.3758 | 0.3700 | 0.1286 | 0.0863     | 0.0828 | 0.0529 | 0.1350 | 0.1306 | 0.0645 |
| 52165   | 0.2024    | 0.2164 | 0.2192 | 0.2130 | 0.2105 | 0.2209 | 0.1104     | 0.1794 | 0.2646 | 0.1329 | 0.1317 | 0.2671 |
| 52950   | 0.1988    | 0.2121 | 0.3564 | 0.1908 | 0.1894 | 0.2352 | 0.1455     | 0.1382 | 1.5510 | 0.1733 | 0.1715 | 0.1274 |
| 53795   | 0.1928    | 0.2079 | 0.2248 | 0.1538 | 0.1550 | 0.2026 | 0.2005     | 0.2108 | 0.2716 | 0.2035 | 0.2018 | 0.2459 |
| 55106   | 0.0885    | 0.0888 | 0.0965 | 0.1041 | 0.1009 | 0.0891 | 0.0864     | 0.0837 | 0.0886 | 0.0916 | 0.0922 | 0.0836 |
| 55830   | 0.1444    | 0.1604 | 0.1489 | 0.1385 | 0.1392 | 0.1470 | 0.1619     | 0.1550 | 0.2186 | 0.2185 | 0.2162 | 0.2160 |
| 60195   | 0.1365    | 0.1272 | 0.1523 | 0.1511 | 0.1512 | 0.1546 | 0.0595     | 0.1715 | 0.1277 | 0.0626 | 0.0620 | 0.1508 |
| 60639   | 0.2549    | 0.2456 | 0.2107 | 0.2813 | 0.2868 | 0.1614 | 0.2084     | 0.2039 | 0.9687 | 0.2109 | 0.2080 | 0.1509 |
| 63798   | 0.1888    | 0.1823 | 0.1416 | 0.3004 | 0.2984 | 0.1683 | 0.0676     | 0.0713 | 0.0676 | 0.0886 | 0.0876 | 0.0935 |
| 66207   | 0.1499    | 0.1477 | 0.3800 | 0.1506 | 0.1499 | 0.1051 | 0.1009     | 0.0993 | 1.0043 | 0.1295 | 0.1266 | 0.0628 |
| 66215   | 0.1105    | 0.1122 | 0.4169 | 0.0985 | 0.0985 | 0.1299 | 0.0986     | 0.1022 | 1.2825 | 0.1055 | 0.1044 | 0.1743 |

| Tour ID        | Long Term     |               |               |               |               |               | Short Term    |               |               |               |               |               |
|----------------|---------------|---------------|---------------|---------------|---------------|---------------|---------------|---------------|---------------|---------------|---------------|---------------|
|                | SDE           | ARMA          | GARCH         | MA            | ES            | NM            | SDE           | ARMA          | GARCH         | MA            | ES            | NM            |
| 66287          | 0.1765        | 0.1760        | 0.1788        | 0.1629        | 0.1629        | 0.1745        | 0.1122        | 0.1106        | 0.1077        | 0.1309        | 0.1310        | 0.1015        |
| 66865          | 0.1860        | 0.1830        | 0.2728        | 0.2537        | 0.2550        | 0.1685        | 0.0978        | 0.0965        | 0.7060        | 0.1196        | 0.1180        | 0.0907        |
| 69925          | 0.5817        | 0.4080        | 0.4661        | 0.4943        | 0.4973        | 0.1864        | 0.2414        | 0.2085        | 2.0521        | 0.2667        | 0.2611        | 0.1388        |
| 71821          | 0.0808        | 0.0736        | 0.1117        | 0.1425        | 0.1400        | 0.0736        | 0.0516        | 0.0489        | 1.0674        | 0.0674        | 0.0666        | 0.0523        |
| 72202          | 0.0686        | 0.0644        | 0.0752        | 0.1591        | 0.1494        | 0.0760        | 0.0675        | 0.0613        | 0.0758        | 0.1071        | 0.1056        | 0.0750        |
| 72532          | 0.1238        | 0.1228        | 0.1230        | 0.1255        | 0.1250        | 0.1231        | 0.2253        | 0.2237        | 0.2264        | 0.2647        | 0.2624        | 0.2274        |
| 72603          | 0.0683        | 0.2003        | 0.0636        | 0.0801        | 0.0847        | 0.0618        | 0.0707        | 0.1091        | 0.0674        | 0.0945        | 0.0932        | 0.0537        |
| 72723          | 0.1401        | 0.1352        | 0.1395        | 0.1819        | 0.1797        | 0.1409        | 0.1239        | 0.1406        | 0.2851        | 0.1251        | 0.1246        | 0.2897        |
| 72869          | 0.1675        | 0.1678        | 0.1681        | 0.1664        | 0.1662        | 0.1673        | 0.1534        | 0.1764        | 0.2570        | 0.2035        | 0.2013        | 0.2621        |
| 73163          | 0.1056        | 0.1085        | 0.1448        | 0.1666        | 0.1698        | 0.1100        | 0.1191        | 0.1199        | 0.1379        | 0.1651        | 0.1639        | 0.1491        |
| 73186          | 0.0543        | 0.0537        | 0.0673        | 0.1123        | 0.1124        | 0.0711        | 0.0566        | 0.0566        | 0.0498        | 0.0680        | 0.0676        | 0.0750        |
| 74983          | 0.1429        | 0.1107        | 0.0875        | 0.1543        | 0.1538        | 0.1521        | 0.1238        | 0.1060        | 0.1246        | 0.1194        | 0.1172        | 0.2033        |
| 78546          | 0.2307        | 0.1644        | 0.3869        | 0.3531        | 0.3548        | 0.1422        | 0.1032        | 0.2370        | 1.7432        | 0.1618        | 0.1585        | 0.1044        |
| 79499          | 0.1890        | 0.2101        | 0.2472        | 0.1358        | 0.1354        | 0.2232        | 0.2030        | 0.2399        | 0.2805        | 0.1352        | 0.1335        | 0.2569        |
| 79769          | 0.1960        | 0.1985        | 0.1998        | 0.3901        | 0.3944        | 0.2038        | 0.1053        | 0.1073        | 0.1145        | 0.1733        | 0.1707        | 0.1172        |
| 83878          | 0.2194        | 0.1964        | 0.3047        | 0.3659        | 0.3673        | 0.1983        | 0.1328        | 0.1300        | 1.5206        | 0.1477        | 0.1472        | 0.1767        |
| 84052          | 0.1799        | 0.1817        | 0.1875        | 0.2248        | 0.2246        | 0.1879        | 0.0656        | 0.0674        | 0.1173        | 0.0718        | 0.0718        | 0.1293        |
| 93877          | 0.1800        | 0.1790        | 0.2105        | 0.2598        | 0.2549        | 0.1754        | 0.1325        | 0.1335        | 0.1755        | 0.1504        | 0.1489        | 0.1388        |
| 1605378        | 0.0912        | 0.0911        | 0.0944        | 0.1045        | 0.1032        | 0.0937        | 0.0815        | 0.0818        | 0.0849        | 0.1052        | 0.1041        | 0.0840        |
| 1605628        | 0.1888        | 0.2279        | 0.4451        | 0.1646        | 0.1664        | 0.1153        | 0.1248        | 0.1437        | 1.1039        | 0.1238        | 0.1226        | 0.1121        |
| 1607268        | 0.1830        | 0.1885        | 0.1341        | 0.2717        | 0.2742        | 0.1435        | 0.2025        | 0.2028        | 0.1704        | 0.2350        | 0.2321        | 0.1929        |
| 1608443        | 0.1201        | 0.1111        | 0.1014        | 0.1524        | 0.1495        | 0.0982        | 0.0714        | 0.0582        | 0.1600        | 0.1093        | 0.1059        | 0.1401        |
| 1609587        | 0.1169        | 0.1171        | 0.1169        | 0.1190        | 0.1183        | 0.1191        | 0.0971        | 0.0959        | 0.1297        | 0.1317        | 0.1303        | 0.0989        |
| 1612648        | 0.1527        | 0.1220        | 0.1788        | 0.1786        | 0.1786        | 0.1159        | 0.1516        | 0.1310        | 0.2156        | 0.1847        | 0.1822        | 0.1386        |
| 1614660        | 0.3924        | 0.3424        | 0.4808        | 0.5196        | 0.5146        | 0.3292        | 0.3724        | 0.3700        | 1.3050        | 0.4592        | 0.4508        | 0.3815        |
| 1617321        | 0.2123        | 0.2152        | 0.2403        | 0.1787        | 0.1789        | 0.2145        | 0.0853        | 0.0820        | 0.0717        | 0.1195        | 0.1180        | 0.0798        |
| 1620855        | 0.1533        | 0.1514        | 0.1470        | 0.2148        | 0.2045        | 0.1505        | 0.1233        | 0.1277        | 0.2256        | 0.1793        | 0.1756        | 0.2319        |
| 1621632        | 0.2484        | 0.2490        | 0.2472        | 0.1963        | 0.1975        | 0.2499        | 0.1383        | 0.1434        | 0.2854        | 0.1650        | 0.1639        | 0.2890        |
| 1621699        | 0.2233        | 0.2280        | 0.3661        | 0.1971        | 0.1971        | 0.2504        | 0.2283        | 0.2351        | 1.1856        | 0.2254        | 0.2220        | 0.2851        |
| 1623624        | 0.1758        | 0.1740        | 0.1897        | 0.1803        | 0.1782        | 0.1742        | 0.0566        | 0.0546        | 0.0588        | 0.0605        | 0.0607        | 0.0538        |
| 1624666        | 0.0396        | 0.0319        | 0.2850        | 0.1038        | 0.1095        | 0.0625        | 0.0401        | 0.0347        | 0.8489        | 0.0862        | 0.0849        | 0.0590        |
| 1633110        | 0.4440        | 0.2199        | 0.2950        | 0.4449        | 0.4465        | 0.1816        | 0.1378        | 0.2925        | 1.4003        | 0.2372        | 0.2316        | 0.1690        |
| 85207          | 0.1697        | 0.1599        | 0.1658        | 0.1779        | 0.1781        | 0.1597        | 0.1508        | 0.1560        | 0.1937        | 0.1805        | 0.1781        | 0.1826        |
| 85282          | 0.0745        | 0.0682        | 0.0810        | 0.0868        | 0.0869        | 0.0676        | 0.0880        | 0.0795        | 0.1175        | 0.0997        | 0.0985        | 0.0831        |
| 93804          | 0.1252        | 0.1238        | 0.2188        | 0.1184        | 0.1210        | 0.1218        | 0.1136        | 0.1182        | 1.2461        | 0.1263        | 0.1248        | 0.1483        |
| 60051          | 0.1405        | 0.1567        | 0.1499        | 0.1875        | 0.1810        | 0.1834        | 0.0820        | 0.0836        | 0.1301        | 0.1264        | 0.1242        | 0.1639        |
| 44248          | 0.1749        | 0.1716        | 0.1750        | 0.2212        | 0.2169        | 0.1579        | 0.1563        | 0.1548        | 0.1764        | 0.1633        | 0.1609        | 0.1552        |
| 69982          | 0.1727        | 0.1654        | 0.2074        | 0.1796        | 0.1771        | 0.2089        | 0.1852        | 0.1627        | 0.2249        | 0.2238        | 0.2235        | 0.2248        |
| 76106          | 0.0955        | 0.1100        | 0.0856        | 0.0754        | 0.0751        | 0.1168        | 0.1055        | 0.1054        | 0.1168        | 0.1398        | 0.1384        | 0.1041        |
| 1601410        | 0.1211        | 0.1237        | 0.1471        | 0.1679        | 0.1696        | 0.1445        | 0.1159        | 0.1186        | 0.1296        | 0.2193        | 0.2166        | 0.1269        |
| 11869          | 0.0996        | 0.1027        | 0.1693        | 0.1431        | 0.1472        | 0.1381        | 0.0721        | 0.0719        | 1.5150        | 0.0902        | 0.0897        | 0.1364        |
| 78511          | 0.1446        | 0.1442        | 0.1528        | 0.2008        | 0.2044        | 0.1439        | 0.1350        | 0.1354        | 0.1758        | 0.1713        | 0.1693        | 0.1446        |
| 82421          | 0.1083        | 0.1170        | 0.1225        | 0.1232        | 0.1191        | 0.1167        | 0.0842        | 0.0892        | 0.1028        | 0.0988        | 0.0964        | 0.0929        |
| 15618          | 0.0743        | 0.0971        | 0.4278        | 0.0626        | 0.0586        | 0.0801        | 0.0618        | 0.0849        | 1.4891        | 0.0590        | 0.0572        | 0.0720        |
| 36953          | 0.0991        | 0.0766        | 0.0717        | 0.1312        | 0.1321        | 0.0720        | 0.0786        | 0.1535        | 0.0578        | 0.0970        | 0.0965        | 0.0586        |
| 66666          | 0.1176        | 0.1150        | 0.1422        | 0.2653        | 0.2754        | 0.1394        | 0.1125        | 0.1080        | 0.1335        | 0.2099        | 0.2075        | 0.1468        |
| 94870          | 0.0742        | 0.0739        | 0.0908        | 0.0804        | 0.0804        | 0.0798        | 0.0569        | 0.0589        | 0.0836        | 0.0934        | 0.0944        | 0.0680        |
| 91836          | 0.2043        | 0.2347        | 0.2863        | 0.4233        | 0.4233        | 0.2500        | 0.2142        | 0.2318        | 1.5449        | 0.3547        | 0.3518        | 0.3183        |
| 22349          | 0.0604        | 0.2607        | 0.2154        | 0.0571        | 0.0570        | 0.1295        | 0.0656        | 0.2220        | 0.2205        | 0.0724        | 0.0730        | 0.1350        |
| 83648          | 0.1254        | 0.1297        | 0.1452        | 0.1553        | 0.1590        | 0.1727        | 0.1439        | 0.1218        | 0.1842        | 0.2316        | 0.2281        | 0.2426        |
| 44983          | 0.0643        | 0.0741        | 0.1273        | 0.0900        | 0.0882        | 0.0730        | 0.0545        | 0.2349        | 0.1255        | 0.0718        | 0.0710        | 0.0582        |
| 71801          | 0.1606        | 0.1600        | 0.1622        | 0.1615        | 0.1612        | 0.1600        | 0.0677        | 0.1157        | 0.1586        | 0.1002        | 0.0996        | 0.1083        |
| 58776          | 0.0656        | 0.0645        | 0.0671        | 0.1370        | 0.1292        | 0.0653        | 0.0731        | 0.0724        | 0.0507        | 0.1073        | 0.1052        | 0.0790        |
| 74359          | 0.0936        | 0.0938        | 0.0962        | 0.0965        | 0.0975        | 0.0926        | 0.0708        | 0.0752        | 0.0933        | 0.0550        | 0.0546        | 0.0893        |
| 1603059        | 0.1476        | 0.1451        | 0.3081        | 0.2203        | 0.2158        | 0.1352        | 0.0919        | 0.0922        | 1.2139        | 0.0938        | 0.0921        | 0.1106        |
| 76500          | 0.1289        | 0.1285        | 0.1295        | 0.1429        | 0.1417        | 0.1284        | 0.0709        | 0.0708        | 0.0961        | 0.0886        | 0.0883        | 0.0991        |
| 66306          | 0.1138        | 0.2113        | 0.1216        | 0.1194        | 0.1205        | 0.1638        | 0.0894        | 0.1875        | 0.1106        | 0.1266        | 0.1258        | 0.1768        |
| 1626293        | 0.1744        | 0.2030        | 0.2311        | 0.1764        | 0.1753        | 0.2773        | 0.1337        | 0.1397        | 0.2263        | 0.1711        | 0.1688        | 0.2763        |
| 1629646        | 0.4732        | 0.4694        | 0.3537        | 0.4987        | 0.5016        | 0.1946        | 0.2310        | 0.2340        | 1.2511        | 0.3352        | 0.3296        | 0.2561        |
| 90928          | 0.1591        | 0.1656        | 0.3891        | 0.3147        | 0.3204        | 0.2167        | 0.1675        | 0.2007        | 1.6305        | 0.2275        | 0.2256        | 0.2180        |
| <b>average</b> | <b>0.1537</b> | <b>0.1582</b> | <b>0.1914</b> | <b>0.1922</b> | <b>0.1921</b> | <b>0.1488</b> | <b>0.1129</b> | <b>0.1330</b> | <b>0.4722</b> | <b>0.1433</b> | <b>0.1415</b> | <b>0.1448</b> |

Table 4-6: Out-of-Sample Predictive Performance Results (SMAPE)

| Tour ID | Long Term |        |        |        |        |        | Short Term |        |        |        |        |        |
|---------|-----------|--------|--------|--------|--------|--------|------------|--------|--------|--------|--------|--------|
|         | SDE       | ARMA   | GARCH  | MA     | ES     | NM     | SDE        | ARMA   | GARCH  | MA     | ES     | NM     |
| 5106    | 0.1766    | 0.1931 | 0.1798 | 0.1743 | 0.1743 | 0.1930 | 0.2760     | 0.2736 | 0.3945 | 0.3297 | 0.3256 | 0.3695 |
| 72528   | 0.1329    | 0.1315 | 0.1459 | 0.1276 | 0.1274 | 0.1277 | 0.0532     | 0.0507 | 0.1179 | 0.0732 | 0.0724 | 0.0629 |
| 73154   | 0.1621    | 0.1650 | 0.1731 | 0.2244 | 0.2166 | 0.1620 | 0.1752     | 0.2123 | 0.1638 | 0.1989 | 0.1972 | 0.1663 |
| 80961   | 0.2734    | 0.2521 | 0.2606 | 0.3752 | 0.3733 | 0.2562 | 0.3223     | 0.3639 | 0.2116 | 0.3978 | 0.3910 | 0.2852 |
| 29336   | 0.1748    | 0.1790 | 0.2128 | 0.1714 | 0.1714 | 0.1807 | 0.1459     | 0.1070 | 0.1164 | 0.1742 | 0.1718 | 0.0983 |
| 23222   | 0.2443    | 0.2464 | 0.2728 | 0.3735 | 0.3800 | 0.2504 | 0.1780     | 0.1696 | 0.2985 | 0.2912 | 0.2879 | 0.2402 |
| 30938   | 0.2116    | 0.2096 | 0.3062 | 0.1986 | 0.1969 | 0.2007 | 0.0941     | 0.0918 | 0.6573 | 0.1085 | 0.1081 | 0.0869 |
| 71480   | 0.2421    | 0.2184 | 0.2166 | 0.4362 | 0.4344 | 0.2219 | 0.1510     | 0.0855 | 0.0960 | 0.2038 | 0.2004 | 0.1142 |
| 88292   | 0.2337    | 0.1732 | 0.1994 | 0.3145 | 0.3185 | 0.1664 | 0.0906     | 0.0724 | 0.1225 | 0.1248 | 0.1219 | 0.0722 |
| 1618693 | 0.3596    | 0.3567 | 0.3800 | 0.5184 | 0.5321 | 0.3534 | 0.1051     | 0.3309 | 0.5110 | 0.0650 | 0.0616 | 0.5640 |
| 56737   | 0.2478    | 0.2734 | 0.3048 | 0.2912 | 0.2973 | 0.2744 | 0.1270     | 0.1998 | 0.3939 | 0.1577 | 0.1560 | 0.3113 |
| 71478   | 0.2036    | 0.1982 | 0.3479 | 0.1380 | 0.1402 | 0.2344 | 0.1173     | 0.1181 | 0.6809 | 0.1362 | 0.1349 | 0.2723 |
| 49049   | 0.2270    | 0.2047 | 0.2429 | 0.2214 | 0.2222 | 0.2182 | 0.1010     | 0.2313 | 0.6404 | 0.1164 | 0.1151 | 0.2135 |
| 72526   | 0.2199    | 0.2164 | 0.3429 | 0.2480 | 0.2433 | 0.2105 | 0.1095     | 0.1207 | 0.6574 | 0.1238 | 0.1205 | 0.2547 |
| 32391   | 0.1861    | 0.2189 | 0.1972 | 0.2677 | 0.2695 | 0.1883 | 0.0649     | 0.2256 | 0.0824 | 0.0747 | 0.0747 | 0.1045 |
| 72527   | 0.1701    | 0.1790 | 0.2683 | 0.1696 | 0.1690 | 0.2099 | 0.1352     | 0.1185 | 0.6345 | 0.1332 | 0.1326 | 0.1845 |
| 69278   | 0.1886    | 0.1938 | 0.2309 | 0.2017 | 0.1971 | 0.2026 | 0.2243     | 0.2171 | 0.2016 | 0.2510 | 0.2506 | 0.2141 |
| 28245   | 0.1938    | 0.1944 | 0.2199 | 0.1919 | 0.1918 | 0.1916 | 0.1442     | 0.1426 | 0.3207 | 0.1596 | 0.1577 | 0.2082 |
| 30814   | 0.2328    | 0.2344 | 0.2034 | 0.3093 | 0.3083 | 0.2378 | 0.3832     | 0.3931 | 0.3877 | 0.4262 | 0.4223 | 0.4460 |
| 16311   | 0.1406    | 0.1411 | 0.1404 | 0.1609 | 0.1613 | 0.1407 | 0.0601     | 0.0574 | 0.0669 | 0.0704 | 0.0698 | 0.0546 |
| 2753    | 0.4038    | 0.3469 | 0.4658 | 0.5378 | 0.5378 | 0.2197 | 0.2726     | 0.2444 | 0.6888 | 0.3906 | 0.3842 | 0.1690 |
| 3150    | 0.0887    | 0.0846 | 0.0963 | 0.0842 | 0.0827 | 0.1038 | 0.0825     | 0.0921 | 0.1206 | 0.0836 | 0.0825 | 0.1362 |
| 4171    | 0.1246    | 0.3284 | 0.1692 | 0.2224 | 0.2230 | 0.1649 | 0.1067     | 0.3189 | 0.3161 | 0.1408 | 0.1395 | 0.2837 |
| 5107    | 0.1666    | 0.1907 | 0.2329 | 0.1764 | 0.1726 | 0.1928 | 0.0880     | 0.2420 | 0.2439 | 0.0864 | 0.0856 | 0.1588 |
| 5452    | 0.1506    | 0.1612 | 0.1738 | 0.2106 | 0.2106 | 0.1509 | 0.0746     | 0.0657 | 0.0773 | 0.0891 | 0.0884 | 0.0605 |
| 5603    | 0.2472    | 0.2467 | 0.3205 | 0.2459 | 0.2487 | 0.2486 | 0.2395     | 0.2386 | 0.6542 | 0.2746 | 0.2727 | 0.2473 |
| 6712    | 0.1459    | 0.8333 | 0.5242 | 0.1671 | 0.1744 | 0.2271 | 0.1642     | 0.3536 | 0.6187 | 0.1787 | 0.1780 | 0.2624 |
| 7297    | 0.2122    | 0.2084 | 0.2816 | 0.3603 | 0.3618 | 0.2414 | 0.1079     | 0.0947 | 0.7452 | 0.1851 | 0.1826 | 0.2314 |
| 9474    | 0.1428    | 0.1418 | 0.1433 | 0.1652 | 0.1640 | 0.1424 | 0.1884     | 0.1688 | 0.1959 | 0.2424 | 0.2399 | 0.1948 |
| 11626   | 0.0779    | 0.0865 | 0.1442 | 0.0707 | 0.0710 | 0.1127 | 0.0769     | 0.0826 | 0.1423 | 0.0939 | 0.0933 | 0.1088 |
| 12043   | 0.0957    | 0.1031 | 0.1175 | 0.1004 | 0.1018 | 0.1390 | 0.1205     | 0.1226 | 0.1190 | 0.1834 | 0.1825 | 0.1314 |
| 17184   | 0.1908    | 0.1824 | 0.2026 | 0.1643 | 0.1635 | 0.1781 | 0.1837     | 0.1592 | 0.1382 | 0.1808 | 0.1816 | 0.1348 |
| 18201   | 0.1314    | 0.1435 | 0.3911 | 0.3308 | 0.3219 | 0.2575 | 0.1561     | 0.1343 | 0.6651 | 0.2734 | 0.2691 | 0.2403 |
| 20131   | 0.1788    | 0.2037 | 0.2362 | 0.3288 | 0.3278 | 0.1331 | 0.1835     | 0.1913 | 0.6422 | 0.2340 | 0.2323 | 0.1650 |
| 21148   | 0.1921    | 0.1872 | 0.2219 | 0.3115 | 0.3160 | 0.1981 | 0.1355     | 0.1316 | 0.1573 | 0.2019 | 0.1991 | 0.1364 |
| 21509   | 0.2070    | 0.2017 | 0.1793 | 0.4057 | 0.4113 | 0.2006 | 0.1349     | 0.1269 | 0.1407 | 0.2198 | 0.2173 | 0.1287 |
| 22510   | 0.0759    | 0.0730 | 0.1623 | 0.1820 | 0.1820 | 0.0989 | 0.0509     | 0.0419 | 0.6960 | 0.1141 | 0.1126 | 0.0892 |
| 22809   | 0.1483    | 0.1489 | 0.1256 | 0.1969 | 0.1950 | 0.1196 | 0.1659     | 0.3530 | 0.1876 | 0.1836 | 0.1804 | 0.1716 |
| 26561   | 0.1221    | 0.1571 | 0.1105 | 0.1470 | 0.1453 | 0.1165 | 0.0826     | 0.2358 | 0.0712 | 0.0856 | 0.0844 | 0.0968 |
| 28977   | 0.1957    | 0.1896 | 0.2495 | 0.1586 | 0.1590 | 0.1993 | 0.1060     | 0.1023 | 0.2657 | 0.1176 | 0.1163 | 0.1784 |
| 44981   | 0.0947    | 0.1264 | 0.1563 | 0.1717 | 0.1624 | 0.1315 | 0.0665     | 0.2016 | 0.1480 | 0.0930 | 0.0911 | 0.1204 |
| 46254   | 0.0794    | 0.0788 | 0.0860 | 0.1123 | 0.1164 | 0.0917 | 0.0436     | 0.0448 | 0.0636 | 0.0572 | 0.0569 | 0.0749 |
| 49063   | 0.1842    | 0.1808 | 0.1847 | 0.2193 | 0.2136 | 0.1794 | 0.1477     | 0.1429 | 0.1289 | 0.2016 | 0.1978 | 0.1412 |
| 49232   | 0.2063    | 0.2053 | 0.1997 | 0.2567 | 0.2531 | 0.1978 | 0.4035     | 0.4234 | 0.4892 | 0.5475 | 0.5505 | 0.4798 |
| 49435   | 0.1717    | 0.1809 | 0.1898 | 0.3770 | 0.3756 | 0.1853 | 0.1588     | 0.2611 | 0.1924 | 0.2297 | 0.2282 | 0.2003 |
| 50327   | 0.2615    | 0.2547 | 0.2628 | 0.2496 | 0.2500 | 0.2579 | 0.0963     | 0.0818 | 0.1012 | 0.1442 | 0.1423 | 0.0925 |
| 51324   | 0.1544    | 0.1510 | 0.1411 | 0.3043 | 0.3013 | 0.1385 | 0.0949     | 0.0923 | 0.0642 | 0.1318 | 0.1283 | 0.0768 |
| 52165   | 0.1995    | 0.2165 | 0.2201 | 0.2123 | 0.2092 | 0.2223 | 0.0929     | 0.1572 | 0.2602 | 0.1133 | 0.1121 | 0.2635 |
| 52950   | 0.1387    | 0.1491 | 0.2269 | 0.1331 | 0.1321 | 0.1667 | 0.1262     | 0.1289 | 0.6019 | 0.1470 | 0.1457 | 0.1144 |
| 53795   | 0.2483    | 0.2768 | 0.3108 | 0.1862 | 0.1878 | 0.2666 | 0.2422     | 0.2579 | 0.3643 | 0.2480 | 0.2456 | 0.3137 |
| 55106   | 0.0595    | 0.0597 | 0.0653 | 0.0709 | 0.0686 | 0.0599 | 0.0592     | 0.0573 | 0.0609 | 0.0632 | 0.0637 | 0.0573 |
| 55830   | 0.1155    | 0.1313 | 0.1195 | 0.1106 | 0.1111 | 0.1178 | 0.1141     | 0.1110 | 0.1565 | 0.1459 | 0.1444 | 0.1543 |
| 60195   | 0.1944    | 0.1854 | 0.2134 | 0.2070 | 0.2068 | 0.2177 | 0.0570     | 0.1630 | 0.1324 | 0.0587 | 0.0581 | 0.1607 |
| 60639   | 0.3442    | 0.3379 | 0.3563 | 0.3668 | 0.3709 | 0.2680 | 0.2921     | 0.2887 | 0.6087 | 0.2963 | 0.2937 | 0.2414 |
| 63798   | 0.2096    | 0.2045 | 0.1711 | 0.2864 | 0.2852 | 0.1932 | 0.0687     | 0.0716 | 0.0691 | 0.0876 | 0.0872 | 0.0918 |
| 66207   | 0.1291    | 0.1276 | 0.3895 | 0.1297 | 0.1293 | 0.0939 | 0.0928     | 0.0916 | 0.6153 | 0.1177 | 0.1152 | 0.0592 |
| 66215   | 0.1054    | 0.1072 | 0.4361 | 0.0933 | 0.0932 | 0.1271 | 0.0900     | 0.0934 | 0.6124 | 0.0968 | 0.0957 | 0.1678 |

| Tour ID        | Long Term     |               |               |               |               |               | Short Term    |               |               |               |               |               |
|----------------|---------------|---------------|---------------|---------------|---------------|---------------|---------------|---------------|---------------|---------------|---------------|---------------|
|                | SDE           | ARMA          | GARCH         | MA            | ES            | NM            | SDE           | ARMA          | GARCH         | MA            | ES            | NM            |
| 66287          | 0.1648        | 0.1644        | 0.1665        | 0.1538        | 0.1538        | 0.1633        | 0.1080        | 0.1062        | 0.1008        | 0.1286        | 0.1287        | 0.0958        |
| 66865          | 0.3084        | 0.3018        | 0.4836        | 0.4874        | 0.4914        | 0.2719        | 0.2067        | 0.2020        | 0.6570        | 0.2737        | 0.2695        | 0.1816        |
| 69925          | 0.2424        | 0.1858        | 0.2701        | 0.2154        | 0.2164        | 0.1018        | 0.1165        | 0.1037        | 0.5774        | 0.1281        | 0.1256        | 0.0784        |
| 71821          | 0.1129        | 0.1018        | 0.1766        | 0.2237        | 0.2187        | 0.1026        | 0.0741        | 0.0696        | 0.5883        | 0.1022        | 0.1007        | 0.0748        |
| 72202          | 0.1812        | 0.1731        | 0.1949        | 0.3081        | 0.2965        | 0.1961        | 0.1778        | 0.1666        | 0.1976        | 0.2394        | 0.2372        | 0.1950        |
| 72532          | 0.1672        | 0.1658        | 0.1661        | 0.1697        | 0.1691        | 0.1663        | 0.2478        | 0.2436        | 0.2437        | 0.3064        | 0.3033        | 0.2450        |
| 72603          | 0.0487        | 0.1249        | 0.0453        | 0.0565        | 0.0596        | 0.0441        | 0.0513        | 0.0827        | 0.0496        | 0.0665        | 0.0656        | 0.0398        |
| 72723          | 0.2358        | 0.2255        | 0.2339        | 0.2753        | 0.2732        | 0.2367        | 0.1382        | 0.1552        | 0.3675        | 0.1367        | 0.1361        | 0.3759        |
| 72869          | 0.1902        | 0.1905        | 0.1913        | 0.1890        | 0.1888        | 0.1902        | 0.2393        | 0.2705        | 0.3500        | 0.3538        | 0.3517        | 0.3538        |
| 73163          | 0.1028        | 0.1061        | 0.1481        | 0.1743        | 0.1783        | 0.1102        | 0.1254        | 0.1264        | 0.1507        | 0.1894        | 0.1877        | 0.1626        |
| 73186          | 0.0529        | 0.0524        | 0.0658        | 0.1164        | 0.1165        | 0.0690        | 0.0585        | 0.0585        | 0.0519        | 0.0723        | 0.0717        | 0.0755        |
| 74983          | 0.1568        | 0.1146        | 0.0872        | 0.1720        | 0.1713        | 0.1689        | 0.1232        | 0.1029        | 0.1205        | 0.1177        | 0.1153        | 0.2180        |
| 78546          | 0.1430        | 0.1087        | 0.2159        | 0.2008        | 0.2015        | 0.0954        | 0.0640        | 0.1895        | 0.5766        | 0.0980        | 0.0963        | 0.0663        |
| 79499          | 0.2371        | 0.2566        | 0.2876        | 0.1879        | 0.1875        | 0.2683        | 0.2654        | 0.3001        | 0.3336        | 0.2000        | 0.1980        | 0.3151        |
| 79769          | 0.3488        | 0.3506        | 0.3547        | 0.4670        | 0.4693        | 0.3569        | 0.1480        | 0.1505        | 0.1601        | 0.2117        | 0.2094        | 0.1629        |
| 83878          | 0.1671        | 0.1456        | 0.2280        | 0.3358        | 0.3377        | 0.1505        | 0.1231        | 0.1203        | 0.6443        | 0.1423        | 0.1416        | 0.1626        |
| 84052          | 0.2135        | 0.2155        | 0.2225        | 0.2766        | 0.2762        | 0.2223        | 0.1012        | 0.1030        | 0.1620        | 0.1146        | 0.1146        | 0.1746        |
| 93877          | 0.2085        | 0.2069        | 0.2567        | 0.3471        | 0.3374        | 0.2018        | 0.1521        | 0.1532        | 0.2192        | 0.1831        | 0.1806        | 0.1600        |
| 1605378        | 0.0841        | 0.0840        | 0.0872        | 0.0972        | 0.0960        | 0.0865        | 0.0802        | 0.0805        | 0.0839        | 0.1002        | 0.0992        | 0.0830        |
| 1605628        | 0.3134        | 0.4106        | 0.4809        | 0.2600        | 0.2638        | 0.1459        | 0.1864        | 0.2238        | 0.6172        | 0.1850        | 0.1829        | 0.1385        |
| 1607268        | 0.1532        | 0.1567        | 0.1203        | 0.2081        | 0.2095        | 0.1271        | 0.1921        | 0.1923        | 0.1703        | 0.2107        | 0.2088        | 0.1868        |
| 1608443        | 0.1853        | 0.1768        | 0.1658        | 0.2185        | 0.2157        | 0.1633        | 0.1471        | 0.1137        | 0.2677        | 0.2182        | 0.2128        | 0.2448        |
| 1609587        | 0.1194        | 0.1196        | 0.1199        | 0.1221        | 0.1214        | 0.1214        | 0.0841        | 0.0827        | 0.1145        | 0.1195        | 0.1182        | 0.0850        |
| 1612648        | 0.3008        | 0.2321        | 0.3670        | 0.3661        | 0.3661        | 0.2178        | 0.2495        | 0.2240        | 0.4000        | 0.3028        | 0.2984        | 0.2350        |
| 1614660        | 0.4334        | 0.3631        | 0.4759        | 0.7127        | 0.6955        | 0.3539        | 0.3639        | 0.3508        | 0.6200        | 0.5148        | 0.5012        | 0.3627        |
| 1617321        | 0.1985        | 0.2020        | 0.2325        | 0.1636        | 0.1638        | 0.2012        | 0.1114        | 0.1068        | 0.0939        | 0.1562        | 0.1545        | 0.1046        |
| 1620855        | 0.1561        | 0.1546        | 0.1512        | 0.2011        | 0.1940        | 0.1539        | 0.1460        | 0.1510        | 0.2459        | 0.2205        | 0.2169        | 0.2508        |
| 1621632        | 0.1897        | 0.1902        | 0.1884        | 0.1423        | 0.1433        | 0.1910        | 0.0956        | 0.1000        | 0.2209        | 0.1103        | 0.1095        | 0.2244        |
| 1621699        | 0.2430        | 0.2498        | 0.4735        | 0.2070        | 0.2070        | 0.2837        | 0.2403        | 0.2486        | 0.6838        | 0.2370        | 0.2332        | 0.3163        |
| 1623624        | 0.1829        | 0.1801        | 0.2054        | 0.1901        | 0.1868        | 0.1804        | 0.0955        | 0.0919        | 0.0996        | 0.1028        | 0.1030        | 0.0907        |
| 1624666        | 0.0642        | 0.0516        | 0.4081        | 0.1937        | 0.2072        | 0.1011        | 0.0647        | 0.0554        | 0.5475        | 0.1570        | 0.1545        | 0.0932        |
| 1633110        | 0.3232        | 0.1905        | 0.2591        | 0.3239        | 0.3246        | 0.1702        | 0.1192        | 0.2948        | 0.6299        | 0.2110        | 0.2068        | 0.1594        |
| 85207          | 0.2437        | 0.2267        | 0.2366        | 0.2584        | 0.2587        | 0.2263        | 0.2151        | 0.2164        | 0.2740        | 0.2575        | 0.2539        | 0.2543        |
| 85282          | 0.1204        | 0.1096        | 0.1319        | 0.1424        | 0.1427        | 0.1087        | 0.1228        | 0.1107        | 0.1715        | 0.1403        | 0.1385        | 0.1142        |
| 93804          | 0.2118        | 0.2101        | 0.3048        | 0.2039        | 0.2070        | 0.2079        | 0.2137        | 0.2224        | 0.7231        | 0.2312        | 0.2292        | 0.2665        |
| 60051          | 0.0945        | 0.1070        | 0.1014        | 0.1310        | 0.1258        | 0.1277        | 0.0534        | 0.0552        | 0.0883        | 0.0805        | 0.0790        | 0.1149        |
| 44248          | 0.1615        | 0.1592        | 0.1614        | 0.1922        | 0.1894        | 0.1493        | 0.1436        | 0.1430        | 0.1603        | 0.1494        | 0.1475        | 0.1450        |
| 69982          | 0.1394        | 0.1341        | 0.1695        | 0.1451        | 0.1430        | 0.1708        | 0.1323        | 0.1190        | 0.1708        | 0.1536        | 0.1532        | 0.1705        |
| 76106          | 0.1993        | 0.2217        | 0.1828        | 0.1615        | 0.1606        | 0.2343        | 0.1831        | 0.1685        | 0.2038        | 0.2553        | 0.2525        | 0.1804        |
| 1601410        | 0.1634        | 0.1674        | 0.1968        | 0.2268        | 0.2293        | 0.1927        | 0.1437        | 0.1491        | 0.1658        | 0.3172        | 0.3129        | 0.1619        |
| 11869          | 0.1075        | 0.1127        | 0.1825        | 0.1365        | 0.1397        | 0.1587        | 0.0780        | 0.0787        | 0.6181        | 0.0899        | 0.0897        | 0.1609        |
| 78511          | 0.1627        | 0.1623        | 0.1667        | 0.2412        | 0.2470        | 0.1602        | 0.1774        | 0.1777        | 0.2104        | 0.2203        | 0.2180        | 0.1847        |
| 82421          | 0.0868        | 0.0940        | 0.0986        | 0.0991        | 0.0958        | 0.0938        | 0.0740        | 0.0783        | 0.0899        | 0.0870        | 0.0851        | 0.0819        |
| 15618          | 0.0919        | 0.1152        | 0.4348        | 0.0815        | 0.0762        | 0.0981        | 0.0762        | 0.1002        | 0.6575        | 0.0744        | 0.0721        | 0.0872        |
| 36953          | 0.1518        | 0.1293        | 0.1163        | 0.1879        | 0.1889        | 0.1168        | 0.1155        | 0.2634        | 0.0878        | 0.1402        | 0.1397        | 0.0891        |
| 66666          | 0.0918        | 0.0893        | 0.1068        | 0.1787        | 0.1839        | 0.1048        | 0.0752        | 0.0746        | 0.0877        | 0.1279        | 0.1265        | 0.0974        |
| 94870          | 0.1022        | 0.1018        | 0.1256        | 0.1104        | 0.1104        | 0.1097        | 0.0715        | 0.0739        | 0.1074        | 0.1116        | 0.1124        | 0.0849        |
| 91836          | 0.1760        | 0.1967        | 0.2368        | 0.2930        | 0.2930        | 0.2024        | 0.1526        | 0.1616        | 0.5782        | 0.2170        | 0.2157        | 0.2230        |
| 22349          | 0.0514        | 0.2907        | 0.2213        | 0.0484        | 0.0483        | 0.1205        | 0.0560        | 0.1944        | 0.2254        | 0.0619        | 0.0624        | 0.1252        |
| 83648          | 0.1227        | 0.1260        | 0.1384        | 0.1471        | 0.1501        | 0.1681        | 0.1165        | 0.0992        | 0.1482        | 0.1733        | 0.1708        | 0.2087        |
| 44983          | 0.0568        | 0.0661        | 0.1222        | 0.0820        | 0.0801        | 0.0650        | 0.0489        | 0.2241        | 0.1235        | 0.0660        | 0.0653        | 0.0524        |
| 71801          | 0.2444        | 0.2434        | 0.2449        | 0.2447        | 0.2444        | 0.2434        | 0.1694        | 0.2930        | 0.3145        | 0.2559        | 0.2558        | 0.2447        |
| 58776          | 0.0769        | 0.0756        | 0.0781        | 0.1799        | 0.1674        | 0.0769        | 0.0835        | 0.0820        | 0.0560        | 0.1291        | 0.1262        | 0.0892        |
| 74359          | 0.1230        | 0.1232        | 0.1259        | 0.1261        | 0.1272        | 0.1218        | 0.0945        | 0.1001        | 0.1216        | 0.0757        | 0.0755        | 0.1171        |
| 1603059        | 0.2989        | 0.2960        | 0.4405        | 0.3756        | 0.3713        | 0.2843        | 0.1788        | 0.1799        | 0.6724        | 0.1791        | 0.1766        | 0.2118        |
| 76500          | 0.2079        | 0.2072        | 0.2090        | 0.2329        | 0.2307        | 0.2070        | 0.1439        | 0.1437        | 0.1924        | 0.1897        | 0.1889        | 0.1969        |
| 66306          | 0.0946        | 0.1949        | 0.1005        | 0.0989        | 0.0998        | 0.1295        | 0.0755        | 0.1842        | 0.0929        | 0.1111        | 0.1104        | 0.1394        |
| 1626293        | 0.1164        | 0.1392        | 0.1607        | 0.1167        | 0.1159        | 0.2015        | 0.0884        | 0.0934        | 0.1579        | 0.1072        | 0.1057        | 0.2020        |
| 1629646        | 0.5101        | 0.5035        | 0.3076        | 0.5593        | 0.5646        | 0.1557        | 0.1843        | 0.1861        | 0.5890        | 0.2695        | 0.2635        | 0.1915        |
| 90928          | 0.1272        | 0.1342        | 0.2520        | 0.2077        | 0.2103        | 0.1692        | 0.1193        | 0.1538        | 0.5619        | 0.1505        | 0.1494        | 0.1602        |
| <b>average</b> | <b>0.1793</b> | <b>0.1886</b> | <b>0.2223</b> | <b>0.2234</b> | <b>0.2231</b> | <b>0.1761</b> | <b>0.1377</b> | <b>0.1615</b> | <b>0.3103</b> | <b>0.1734</b> | <b>0.1715</b> | <b>0.1755</b> |

Table 5-1: The Parameter Estimation Results with  $n=10$ 

| Tour ID | $\hat{\lambda}$  | $\hat{\rho}$     | $\hat{\alpha}$    | $\hat{\rho}$     | $\hat{\beta}$    | $\hat{\sigma}$   | $\gamma_1$ | $\gamma_2$ |
|---------|------------------|------------------|-------------------|------------------|------------------|------------------|------------|------------|
| 5106    | 1.595***(0.036)  | 0.298***(0.204)  | 0.207***(0.045)   | 0.023**(0.012)   | 0.037***(0.005)  | 0.544***(0.068)  | 8.12       | 0.05       |
| 72528   | 1.533***(0.042)  | 0.42***(0.227)   | 0.079***(0.016)   | 0.043***(0.016)  | 0.02***(0.002)   | 0.177***(0.006)  | 2.07       | 0.23       |
| 73154   | 2.22***(0.050)   | 0.358***(0.318)  | 0.144***(0.086)   | 0.039***(0.009)  | 0.025***(0.004)  | 1.142***(0.077)  | 2.58       | 0.16       |
| 80961   | 6.377***(0.009)  | 0.193***(0.298)  | 0.4***(0.227)     | 0.018***(0.004)  | 0.02***(0.001)   | 2.143***(0.073)  | 4.35       | 0.04       |
| 29336   | 1.941***(0.022)  | 0.266***(0.162)  | 0.231***(0.108)   | 0.033***(0.012)  | 0.036***(0.003)  | 1.333***(0.07)   | 4.98       | 0.06       |
| 23222   | 1.633***(0.036)  | 0.248***(0.248)  | 0.173****(0.060)  | 0.018*(0.013)    | 0.03***(0.004)   | 0.574***(0.102)  | 7.95       | 0.04       |
| 30938   | 1.54****(0.045)  | 0.279****(0.25)  | 0.093*(0.071)     | 0.002 (0.006)    | 0.016****(0.003) | 0.683****(0.097) | 42.98      | 0.01       |
| 71480   | 3.428****(0.024) | 0.261****(0.32)  | 0.161***(0.074)   | 0.015****(0.007) | 0.015****(0.001) | 0.878****(0.089) | 4.25       | 0.07       |
| 88292   | 3.711****(0.017) | 0.216****(0.284) | 0.244*(0.179)     | 0.012 (0.012)    | 0.021****(0.002) | 1.679****(0.091) | 7.23       | 0.03       |
| 1618693 | 19.72****(0.005) | 0.163****(0.558) | 1.347***(0.651)   | 0.031****(0.003) | 0.023****(0.001) | 4.933****(0.072) | 2.60       | 0.05       |
| 56737   | 7.437****(0.011) | 0.199****(0.4)   | 0.395*(0.297)     | 0.028****(0.005) | 0.021****(0.001) | 2.534****(0.08)  | 2.41       | 0.07       |
| 71478   | 0.624****(0.043) | 0.365****(0.098) | 0.057****(0.011)  | 0.045***(0.024)  | 0.031****(0.004) | 0.116****(0.006) | 3.16       | 0.14       |
| 49049   | 1.565****(0.045) | 0.332****(0.227) | 0.124****(0.034)  | 0.021*(0.016)    | 0.024****(0.003) | 0.461****(0.052) | 5.76       | 0.07       |
| 72526   | 0.932****(0.054) | 0.258****(0.142) | 0.001(0.046)      | 0.236****(0.026) | 0.046****(0.008) | 0.325****(0.018) | 0.01       | 0.36       |
| 32391   | 1.735****(0.047) | 0.309****(0.29)  | 0.094****(0.034)  | 0.024****(0.011) | 0.02****(0.003)  | 0.433****(0.043) | 3.34       | 0.10       |
| 72527   | 0.819****(0.1)   | 0.302****(0.272) | 0.049*(0.037)     | 0.001 (0.031)    | 0.013****(0.004) | 0.308****(0.079) | 118.79     | 0.00       |
| 69278   | 1.199****(0.047) | 0.278****(0.202) | 0.095*(0.073)     | 0.005 (0.017)    | 0.02****(0.003)  | 0.731****(0.109) | 21.04      | 0.02       |
| 28245   | 1.052****(0.057) | 0.357****(0.182) | 0.088****(0.027)  | 0.023***(0.011)  | 0.028****(0.005) | 0.342****(0.035) | 5.62       | 0.08       |
| 30814   | 0.802****(0.071) | 0.288****(0.201) | 0.021 (0.035)     | 0.045****(0.015) | 0.013****(0.003) | 0.357****(0.072) | 0.81       | 0.23       |
| 16311   | 2.268****(0.060) | 0.372****(0.447) | 0.083*(0.057)     | 0.039****(0.01)  | 0.016****(0.003) | 0.773****(0.043) | 1.49       | 0.24       |
| 2753    | 0.275****(0.025) | 0.187****(0.014) | 0.195****(0.034)  | 0.503****(0.017) | 0.548****(0.007) | 0.525****(0.025) | 1.73       | 0.08       |
| 3150    | 0.164****(0.066) | 0.288****(0.077) | -0.003 (0.009)    | 0.165****(0.036) | 0.036****(0.006) | 0.114****(0.01)  | -0.16      | 0.48       |
| 4171    | 0.212****(0.047) | 0.313****(0.038) | 0.002 (0.004)     | 0.131****(0.014) | 0.03****(0.002)  | 0.094****(0.004) | 0.1        | 0.41       |
| 5107    | 1.326****(0.191) | 0.172****(0.024) | 0.004 (0.008)     | 0.005 (0.007)    | 0.003****(0)     | 0.193****(0.003) | 0.68       | 0.12       |
| 5452    | 0.464****(0.062) | 0.292****(0.031) | 0.007*(0.004)     | 0.04****(0.014)  | 0.011****(0.001) | 0.122****(0.003) | 0.5        | 0.28       |
| 5603    | 0.406****(0.096) | 0.184****(0.03)  | 0.011***(0.006)   | 0.039****(0.014) | 0.025****(0.004) | 0.102****(0.004) | 0.83       | 0.12       |
| 6712    | 0.12***(0.055)   | 0.264****(0.096) | 0.005 (0.009)     | 0.095***(0.048)  | 0.051****(0.01)  | 0.108****(0.013) | 0.64       | 0.22       |
| 7297    | 0.547****(0.096) | 0.244****(0.033) | 0.022***(0.011)   | 0.065****(0.017) | 0.038****(0.004) | 0.164****(0.007) | 0.81       | 0.18       |
| 9474    | 0.255****(0.087) | 0.282****(0.082) | 0.001 (0.003)     | 0.015 (0.024)    | 0.005****(0.002) | 0.073****(0.003) | 0.53       | 0.26       |
| 11626   | 0.175****(0.074) | 0.297****(0.058) | 0.009*(0.007)     | 0.127***(0.059)  | 0.04****(0.01)   | 0.077****(0.007) | 0.59       | 0.27       |
| 12043   | 0.108****(0.044) | 0.121****(0.045) | 0.003*(0.003)     | 0.009 (0.015)    | 0.026****(0.006) | 0.049****(0.003) | 3.95       | 0.03       |
| 17184   | 0.236****(0.031) | 0.293****(0.035) | 0.013***(0.007)   | 0.074****(0.021) | 0.019****(0.001) | 0.135****(0.005) | 1.1        | 0.2        |
| 18201   | 0.188****(0.036) | 0.2***(0.028)    | 0.013***(0.006)   | 0.096****(0.011) | 0.095****(0.005) | 0.11****(0.007)  | 0.86       | 0.13       |
| 20131   | 0.27****(0.057)  | 0.296****(0.042) | 0.054****(0.022)  | 0.258****(0.085) | 0.07****(0.009)  | 0.127****(0.014) | 1.1        | 0.2        |
| 21148   | 0.154****(0.062) | 0.321****(0.053) | 0.005*(0.003)     | 0.088****(0.036) | 0.024****(0.006) | 0.053****(0.004) | 0.5        | 0.32       |
| 21509   | 0.457 (0.384)    | 0.36*(0.275)     | 0 (0.011)         | 0.014 (0.029)    | 0.002*(0.002)    | 0.125****(0.008) | -0.12      | 0.64       |
| 22510   | 0.347****(0.056) | 0.422****(0.035) | 0.022*(0.016)     | 0.419****(0.033) | 0.064****(0.003) | 0.212****(0.012) | 0.26       | 0.58       |
| 22809   | 0.387****(0.038) | 0.293****(0.011) | 0.014*(0.009)     | 0.581****(0.024) | 0.176****(0.006) | 0.146****(0.008) | 0.09       | 0.38       |
| 26561   | 0.436****(0.08)  | 0.327****(0.023) | 0.009***(0.005)   | 0.128****(0.018) | 0.04****(0.004)  | 0.098****(0.004) | 0.23       | 0.39       |
| 28977   | 0.33****(0.029)  | 0.361****(0.02)  | 0.016****(0.006)  | 0.206****(0.018) | 0.042****(0.002) | 0.169****(0.004) | 0.37       | 0.41       |
| 44981   | 0.214****(0.039) | 0.375****(0.033) | -0.012****(0.003) | 0.194****(0.021) | 0.021****(0.004) | 0.058****(0.003) | -0.48      | 1.16       |
| 46254   | 0.295****(0.103) | 0.418****(0.04)  | -0.004 (0.005)    | 0.19****(0.027)  | 0.03****(0.004)  | 0.08****(0.005)  | -0.13      | 0.82       |
| 49063   | 0.184****(0.044) | 0.366****(0.049) | 0.011***(0.007)   | 0.179****(0.042) | 0.042****(0.005) | 0.094****(0.007) | 0.55       | 0.37       |
| 49232   | 0.273****(0.038) | 0.303****(0.019) | -0.032****(0.007) | 0.514****(0.022) | 0.083****(0.005) | 0.146****(0.006) | -0.33      | 0.65       |
| 49435   | 0.411****(0.135) | 0.262****(0.077) | 0.002 (0.009)     | 0.027 (0.025)    | 0.009****(0.002) | 0.108****(0.006) | 0.28       | 0.28       |
| 50327   | 0.384****(0.033) | 0.35****(0.017)  | 0.026***(0.011)   | 0.424****(0.018) | 0.085****(0.002) | 0.244****(0.008) | 0.24       | 0.43       |
| 51324   | 0.533****(0.093) | 0.219****(0.035) | 0.004 (0.005)     | 0.017*(0.012)    | 0.01****(0.002)  | 0.133****(0.003) | 0.6        | 0.18       |
| 52165   | 2.027****(0.141) | 0.236****(0.008) | 0.02*(0.016)      | 0.174****(0.007) | 0.057****(0.002) | 0.276****(0.005) | 0.08       | 0.29       |
| 52950   | 0.254****(0.029) | 0.206****(0.006) | 0.017***(0.008)   | 0.855****(0.028) | 0.538****(0.015) | 0.134****(0.008) | 0.1        | 0.24       |
| 53795   | 0.173****(0.025) | 0.236****(0.025) | 0.019***(0.011)   | 0.306****(0.035) | 0.07****(0.004)  | 0.167****(0.008) | 0.47       | 0.21       |
| 55106   | 0.165*(0.121)    | 0.642****(0.054) | 0.001 (0.004)     | 0.288****(0.065) | 0.026****(0.005) | 0.05****(0.006)  | 0.07       | 1.68       |
| 55830   | 0.421****(0.051) | 0.455****(0.018) | 0.013***(0.007)   | 0.385****(0.04)  | 0.075****(0.006) | 0.108****(0.006) | 0.14       | 0.73       |
| 60195   | 0.162****(0.018) | 0.152****(0.012) | 0.028****(0.004)  | 0.106****(0.008) | 0.168****(0.004) | 0.076****(0.005) | 1.89       | 0.06       |
| 60639   | 0.109****(0.028) | 0.189****(0.017) | -0.006 (0.005)    | 0.561****(0.039) | 0.246****(0.018) | 0.071****(0.008) | -0.12      | 0.27       |
| 63798   | 0.157****(0.026) | 0.532****(0.018) | 0.004*(0.003)     | 0.461****(0.034) | 0.058****(0.004) | 0.055****(0.003) | 0.12       | 1.01       |
| 66207   | 0.166*(0.103)    | 0.311****(0.103) | 0.004 (0.005)     | 0.061***(0.031)  | 0.026****(0.007) | 0.06****(0.007)  | 0.57       | 0.29       |
| 66215   | 0.224****(0.055) | 0.267****(0.036) | 0.007 (0.006)     | 0.138****(0.049) | 0.052****(0.011) | 0.083****(0.006) | 0.33       | 0.27       |
| 66287   | 0.295****(0.031) | 0.361****(0.019) | 0.006***(0.004)   | 0.176****(0.015) | 0.049****(0.003) | 0.122****(0.004) | 0.18       | 0.48       |
| 66865   | 0.607****(0.142) | 0.103****(0.024) | -0.019 (0.017)    | 0.055***(0.032)  | 0.009****(0.002) | 0.145****(0.007) | -0.63      | 0.31       |
| 69925   | 0.361****(0.067) | 0.554****(0.038) | 0.014***(0.007)   | 0.239****(0.034) | 0.05****(0.004)  | 0.1****(0.008)   | 0.36       | 0.91       |
| 71821   | 0.249****(0.042) | 0.333****(0.025) | 0.023****(0.009)  | 0.336****(0.03)  | 0.061****(0.003) | 0.083****(0.007) | 0.41       | 0.35       |
| 72202   | 0.454****(0.088) | 0.191****(0.029) | 0.062****(0.033)  | 0.204****(0.037) | 0.066****(0.005) | 0.233****(0.014) | 0.83       | 0.13       |
| 72532   | 0.668***(0.391)  | 0.225***(0.118)  | 0.014*(0.009)     | 0.003 (0.02)     | 0.009***(0.005)  | 0.113****(0.005) | 7.89       | 0.03       |
| 72603   | 0.124***(0.062)  | 0.525****(0.134) | 0.004***(0.002)   | 0.032 (0.028)    | 0.014****(0.004) | 0.041****(0.003) | 1.93       | 0.38       |
| 72723   | 1.505****(0.093) | 0.141****(0.009) | 0.059***(0.026)   | 0.023*(0.017)    | 0.021****(0.001) | 0.323****(0.007) | 2          | 0.05       |
| 72869   | 0.132****(0.018) | 0.514****(0.018) | 0.013****(0.005)  | 0.974****(0.035) | 0.13****(0.004)  | 0.12****(0.007)  | 0.22       | 0.87       |

Notes. The estimation is based on the in-sample data for each tour. The standard error is reported in parentheses.

\*\*\*  $p \leq 0.01$ ; \*\*  $p \leq 0.05$ ; \*  $p \leq 0.10$ .

| Tour ID | $\hat{\lambda}$  | $\hat{\rho}$     | $\hat{\alpha}$   | $\hat{\rho}$      | $\hat{\beta}$    | $\hat{\sigma}$   | $\gamma_1$ | $\gamma_2$ |
|---------|------------------|------------------|------------------|-------------------|------------------|------------------|------------|------------|
| 73163   | 0.205***(0.033)  | 0.364***(0.029)  | 0.001 (0.004)    | 0.205***(0.016)   | 0.04***(0.002)   | 0.097***(0.004)  | 0.04       | 0.55       |
| 73186   | 0.283***(0.051)  | 0.37***(0.053)   | 0.02***(0.006)   | 0.043***(0.021)   | 0.032***(0.003)  | 0.121***(0.006)  | 2.68       | 0.16       |
| 74983   | 0.42***(0.105)   | 0.333***(0.051)  | 0.005 (0.018)    | 0.211***(0.033)   | 0.035***(0.004)  | 0.163***(0.011)  | 0.08       | 0.46       |
| 78546   | 0.225***(0.102)  | 0.564***(0.057)  | 0.004*(0.002)    | 0.09****(0.026)   | 0.02****(0.004)  | 0.055****(0.003) | 0.4        | 0.92       |
| 79499   | 1.486 (1.951)    | 0.38****(0.137)  | -0.012 (0.052)   | 0.102***(0.054)   | 0.016***(0.009)  | 0.184****(0.021) | -0.13      | 0.7        |
| 79769   | 0.731****(0.142) | 0.366****(0.061) | 0.122*(0.093)    | 0.257****(0.055)  | 0.059****(0.004) | 0.542****(0.036) | 1.02       | 0.29       |
| 83878   | 0.349****(0.063) | 0.515****(0.034) | 0.001 (0.007)    | 0.286****(0.027)  | 0.038****(0.003) | 0.117****(0.006) | 0.03       | 1.03       |
| 84052   | 0.249****(0.015) | 0.5****(0.015)   | 0.052****(0.007) | 0.554****(0.015)  | 0.095****(0.001) | 0.238****(0.006) | 0.76       | 0.57       |
| 93877   | 0.557****(0.084) | 0.216****(0.02)  | 0.09***(0.053)   | 0.655****(0.029)  | 0.218****(0.006) | 0.42****(0.026)  | 0.31       | 0.21       |
| 1605378 | 2.411****(0.564) | 0.421****(0.026) | 0.01 (0.029)     | 0.183****(0.02)   | 0.031****(0.003) | 0.223****(0.01)  | 0.04       | 0.7        |
| 1605628 | 0.47****(0.147)  | 0.485****(0.077) | 0.043***(0.022)  | 0.182***(0.081)   | 0.023****(0.004) | 0.103****(0.012) | 0.98       | 0.47       |
| 1607268 | 1.327****(0.294) | 0.522****(0.03)  | 0.032***(0.019)  | 0.215****(0.019)  | 0.036****(0.002) | 0.192****(0.009) | 0.24       | 0.88       |
| 1608443 | 0.418****(0.04)  | 0.339****(0.026) | 1.58*(0.963)     | 15.498****(2.028) | 2.628****(0.211) | 3.426****(0.167) | 0.37       | 0.37       |
| 1609587 | 1.732****(0.665) | 0.436****(0.056) | 0.062*(0.041)    | 0.153****(0.039)  | 0.026****(0.005) | 0.197****(0.015) | 0.42       | 0.55       |
| 1612648 | 0.539****(0.044) | 0.158****(0.01)  | 2.053***(0.98)   | 13.65****(1.287)  | 6.987****(0.447) | 3.736****(0.155) | 0.33       | 0.14       |
| 1614660 | 0.316****(0.084) | 0.196****(0.05)  | -0.03 (0.033)    | 0.246****(0.044)  | 0.062****(0.008) | 0.277****(0.026) | -0.49      | 0.47       |
| 1617321 | 0.593****(0.134) | 0.222****(0.045) | 0.029*(0.019)    | 0.036*(0.026)     | 0.031****(0.004) | 0.188****(0.011) | 1.74       | 0.1        |
| 1620855 | 3.759****(0.691) | 0.414****(0.029) | 0.004 (0.055)    | 0.19****(0.021)   | 0.038****(0.003) | 0.343****(0.016) | 0.01       | 0.7        |
| 1621632 | 2.47****(0.272)  | 0.399****(0.025) | 0.074***(0.037)  | 0.168****(0.015)  | 0.037****(0.002) | 0.395****(0.012) | 0.3        | 0.51       |
| 1621699 | 0.552 (2.003)    | 0.196 (0.444)    | 0.005 (0.021)    | 0.007 (0.059)     | 0.006 (0.018)    | 0.123****(0.012) | 1.45       | 0.1        |
| 1623624 | 1.447***(0.653)  | 0.227***(0.102)  | 0.004 (0.11)     | 0.02 (0.072)      | 0.006***(0.002)  | 0.313****(0.034) | 0.16       | 0.25       |
| 1624666 | 1.1****(0.414)   | 0.309****(0.049) | 0.09***(0.047)   | 0.178****(0.057)  | 0.038****(0.007) | 0.139****(0.017) | 0.66       | 0.27       |
| 1633110 | 0.469*(0.313)    | 0.259****(0.107) | -0.01 (0.011)    | 0.07****(0.019)   | 0.019****(0.007) | 0.134****(0.009) | -0.42      | 0.6        |
| 85207   | 0.894****(0.167) | 0.176****(0.033) | 0.032*(0.023)    | 0.005 (0.055)     | 0.015****(0.003) | 0.196****(0.009) | 9.26       | 0.02       |
| 85282   | 0.415****(0.041) | 0.281****(0.022) | 0.04****(0.016)  | 0.217****(0.012)  | 0.063****(0.001) | 0.287****(0.009) | 0.62       | 0.24       |
| 93804   | 0.378****(0.067) | 0.3****(0.04)    | 0.035****(0.011) | 0.078****(0.022)  | 0.042****(0.003) | 0.147****(0.008) | 1.69       | 0.16       |
| 60051   | 0.151****(0.021) | 0.4****(0.017)   | 0.009*(0.006)    | 0.897****(0.03)   | 0.222****(0.006) | 0.113****(0.009) | 0.11       | 0.6        |
| 44248   | 0.325****(0.129) | 0.32****(0.077)  | 0.012***(0.005)  | 0.027 (0.095)     | 0.029 (0.032)    | 0.066****(0.005) | 2          | 0.16       |
| 69982   | 0.353****(0.089) | 0.24****(0.056)  | 0.026****(0.008) | 0.007 (0.041)     | 0.048****(0.016) | 0.084****(0.007) | 13.93      | 0.02       |
| 76106   | 0.311****(0.037) | 0.2****(0.019)   | 0.049****(0.02)  | 0.307****(0.054)  | 0.131****(0.01)  | 0.298****(0.012) | 0.64       | 0.15       |
| 1601410 | 0.508****(0.122) | 0.231****(0.031) | 0.078***(0.037)  | 0.329****(0.038)  | 0.152****(0.01)  | 0.279****(0.022) | 0.61       | 0.19       |
| 11869   | 0.481****(0.059) | 0.25****(0.022)  | 0.023***(0.014)  | 0.185****(0.024)  | 0.058****(0.004) | 0.227****(0.008) | 0.35       | 0.25       |
| 78511   | 0.256****(0.037) | 0.56****(0.019)  | 0.008*(0.005)    | 0.504****(0.02)   | 0.051****(0.002) | 0.107****(0.005) | 0.14       | 1.12       |
| 82421   | 0.26****(0.038)  | 0.4****(0.03)    | 0.053****(0.01)  | 0.266****(0.045)  | 0.107****(0.008) | 0.1****(0.009)   | 1.28       | 0.29       |
| 15618   | 0.15***(0.072)   | 0.32****(0.043)  | 0 (0.004)        | 0.165****(0.018)  | 0.04****(0.004)  | 0.047****(0.005) | 0.02       | 0.46       |
| 36953   | 0.106****(0.015) | 0.333****(0.035) | 0.023***(0.011)  | 0.473****(0.037)  | 0.1****(0.004)   | 0.2****(0.011)   | 0.68       | 0.3        |
| 66666   | 0.105****(0.008) | 0.5****(0.01)    | 0.004***(0.003)  | 1.161****(0.023)  | 0.193****(0.003) | 0.107****(0.004) | 0.07       | 0.93       |
| 94870   | 0.436****(0.079) | 0.28****(0.037)  | 0.074****(0.015) | 0.075***(0.042)   | 0.056****(0.007) | 0.094****(0.009) | 3.16       | 0.09       |
| 91836   | 0.293****(0.101) | 0.4****(0.041)   | 0.001 (0.005)    | 0.155****(0.018)  | 0.031****(0.003) | 0.084****(0.005) | 0.02       | 0.65       |
| 22349   | 0.166****(0.039) | 0.28****(0.033)  | 0.013****(0.004) | 0.125****(0.024)  | 0.065****(0.006) | 0.053****(0.005) | 0.87       | 0.21       |
| 83648   | 1.054****(0.17)  | 0.379****(0.054) | 0.079***(0.039)  | 0.069****(0.02)   | 0.029****(0.002) | 0.351****(0.016) | 1.75       | 0.22       |
| 44983   | 0.134****(0.029) | 0.174****(0.024) | 0.006****(0.002) | 0.054****(0.016)  | 0.065****(0.008) | 0.055****(0.003) | 1.07       | 0.1        |
| 71801   | 0.129****(0.016) | 0.321****(0.022) | 0.013****(0.005) | 0.438****(0.029)  | 0.077****(0.003) | 0.121****(0.005) | 0.34       | 0.35       |
| 58776   | 0.153****(0.028) | 0.24****(0.021)  | 0.032****(0.012) | 0.651****(0.045)  | 0.236****(0.011) | 0.159****(0.013) | 0.42       | 0.22       |
| 74359   | 0.167****(0.041) | 0.429****(0.018) | 0.01***(0.005)   | 0.64****(0.043)   | 0.09****(0.005)  | 0.059****(0.005) | 0.17       | 0.64       |
| 1603059 | 0.305****(0.053) | 0.214****(0.019) | 0.021***(0.011)  | 0.298****(0.039)  | 0.095****(0.008) | 0.103****(0.008) | 0.29       | 0.21       |
| 76500   | 4.306****(0.714) | 0.373****(0.042) | 0.559***(0.28)   | 0.311****(0.037)  | 0.044****(0.002) | 0.827****(0.042) | 0.67       | 0.36       |
| 66306   | 0.673****(0.089) | 0.586****(0.03)  | 0.071****(0.014) | 0.283****(0.051)  | 0.055****(0.005) | 0.146****(0.009) | 0.9        | 0.74       |
| 1626293 | 0.6****(0.07)    | 0.348****(0.016) | 0.033***(0.016)  | 0.467****(0.031)  | 0.127****(0.006) | 0.168****(0.01)  | 0.18       | 0.45       |
| 1629646 | 1.267****(0.343) | 0.72****(0.045)  | 0.018 (0.031)    | 0.368****(0.065)  | 0.018****(0.002) | 0.191****(0.013) | 0.14       | 2.25       |
| 90928   | 0.386****(0.059) | 0.68****(0.025)  | 0.02****(0.007)  | 0.463****(0.04)   | 0.038****(0.002) | 0.113****(0.006) | 0.35       | 1.57       |

Notes. The estimation is based on the in-sample data for each tour. The standard error is reported in parentheses.

\*\*\*  $p \leq 0.01$ ; \*\*  $p \leq 0.05$ ; \*  $p \leq 0.10$ .

Table 5-2: Predictive Performance of SDE without response

| Method               | Long Term       | Short Term      |
|----------------------|-----------------|-----------------|
| SDE without response | 0.2559 (0.1730) | 0.1503 (0.0740) |
| SDE                  | 0.1878 (0.0868) | 0.1353 (0.0618) |
| ARMA                 | 0.1937 (0.0861) | 0.1547 (0.076)  |
| GARCH                | 0.2505 (0.1383) | 0.6251 (0.7716) |

Notes. The standard deviation is reported in parentheses.

Table 5-3: Predictive Performance Comparison of SDE without response

| Comparison                        | Long Term<br>t-Statistic (p-value) | Short Term<br>t-Statistic (p-value) |
|-----------------------------------|------------------------------------|-------------------------------------|
| SDE without response versus SDE   | 3.8082***(0.0001)                  | 1.6761**(0.0475)                    |
| SDE without response versus ARMA  | 3.4829***(0.0003)                  | -0.4475 (0.3275)                    |
| SDE without response versus GARCH | 0.2639 (0.396)                     | -6.6259***(0)                       |

Notes. \*\*\*  $p \leq 0.01$ ; \*\*  $p \leq 0.05$ ; \*  $p \leq 0.10$ .

Table 6-1: ARMA Estimate for Ctrip Data

| Tour ID | Constant      | AR{1}           | AR{2}            | MA{1}            | MA{2}           |
|---------|---------------|-----------------|------------------|------------------|-----------------|
| 5106    | 0.046 (3.762) | 0.076 (2.791)   | 0.775 (30.64)    | 0.925 (22.880)   | -0.038 (-1.027) |
| 72528   | 0.059 (4.323) | 0.866 (32.443)  | N/A              | 0.107 (2.279)    | 0.226 (4.449)   |
| 73154   | 0.016 (2.965) | 1.737 (22.843)  | -0.774 (-11.862) | -0.771 (-8.388)  | N/A             |
| 80961   | 0.009 (7.068) | 1.732 (47.400)  | -0.769 (-14.684) | -0.679 (-14.684) | N/A             |
| 29336   | 0.058 (5.352) | -0.002 (-0.093) | 0.823 (43.429)   | 0.997 (313.814)  | N/A             |
| 23222   | 0.008 (3.152) | 1.813 (28.596)  | -0.842 (-14.839) | -0.808 (-11.171) | N/A             |
| 30938   | 0.061 (3.161) | 0.012 (0.342)   | 0.825 (29.439)   | 0.989 (115.356)  | N/A             |
| 71478   | 0.054 (5.881) | 0.039 (2.405)   | 0.792 (59.479)   | 0.988 (202.526)  | N/A             |
| 88292   | 0.046 (3.926) | 0.063 (3.959)   | 0.786 (44.934)   | 1.012 (31.914)   | 0.020 (0.625)   |
| 1618693 | 0.007 (5.810) | 1.715 (39.246)  | -0.750 (-19.549) | -0.742 (-14.651) | N/A             |
| 56737   | 0.007 (5.095) | 1.759 (40.064)  | -0.789 (-20.139) | -0.757 (-13.881) | N/A             |
| 71478   | 0.010 (2.408) | 1.671 (13.893)  | -0.711 (-6.564)  | -0.620 (-4.042)  | N/A             |
| 49049   | 0.040 (3.425) | 0.044 (2.073)   | 0.832 (41.306)   | 0.992 (172.259)  | N/A             |
| 72526   | 0.029 (2.438) | 0.885 (25.129)  | N/A              | 0.002 (0.029)    | N/A             |
| 32391   | 0.067 (4.534) | 0.037 (1.531)   | 0.789 (49.048)   | 0.995 (27.503)   | -0.001 (-0.003) |
| 72527   | 0.029 (1.909) | 0.033 (0.870)   | 0.824 (20.015)   | 1 (89.927)       | N/A             |
| 69278   | 0.012 (2.073) | 1.697 (12.410)  | -0.734 (-6.079)  | -0.694 (-4.319)  | N/A             |
| 28245   | 0.038 (4.313) | 0.062 (2.488)   | 0.833 (33.982)   | 1 (193.147)      | N/A             |
| 30814   | 0.013 (2.865) | 1.749 (18.315)  | -0.789 (-9.176)  | -0.742 (-6.878)  | N/A             |
| 16311   | 0.014 (2.695) | 1.730 (19.305)  | -0.764 (-9.737)  | -0.763 (-7.343)  | N/A             |
| 2753    | 0.006 (0.703) | 0.980 (58.916)  | N/A              | 0.062 (0.828)    | N/A             |
| 3150    | 0.007 (1.751) | 1.691 (14.342)  | -0.707 (-6.459)  | -1 (6.742)       | N/A             |
| 4171    | 0.003 (1.488) | 1.918 (48.415)  | -0.925 (-25.414) | -0.951 (-18.351) | N/A             |
| 5107    | 0.003 (3.231) | 1.866 (47.091)  | -0.873 (-23.252) | -0.862 (-18.104) | N/A             |
| 5452    | 0.037 (5.303) | 0.001 (0.065)   | 0.894 (65.747)   | 1 (349.629)      | N/A             |
| 5603    | 0.025 (3.533) | 0.92 (44.454)   | N/A              | 0.138 (2.617)    | N/A             |
| 6712    | 0.002 (0.632) | 1.972 (19.701)  | -0.98 (-10.486)  | -1 (-5.272)      | N/A             |
| 7297    | 0.019 (2.032) | 0.959 (54.207)  | N/A              | 0.15 (2.927)     | N/A             |
| 9474    | 0.033 (3.048) | 0.034 (1.609)   | 0.874 (31.636)   | 1.071 (21.025)   | 0.071 (1.374)   |
| 11626   | 0.036 (1.784) | 0.913 (17.869)  | N/A              | 0.145 (1.183)    | N/A             |
| 12043   | 0.034 (3.309) | 0.909 (30.682)  | N/A              | 0.203 (2.176)    | N/A             |
| 17184   | 0.011 (2.048) | 0.957 (65.037)  | N/A              | 0.108 (1.886)    | N/A             |
| 18201   | 0.018 (1.107) | 0.967 (38.855)  | N/A              | -0.038 (-0.432)  | 0.274 (3.022)   |
| 20131   | 0.016 (1.544) | 0.962 (33.816)  | N/A              | -0.091 (-0.795)  | N/A             |
| 21148   | 0.033 (1.902) | 0.92 (23.184)   | N/A              | 0.161 (1.497)    | N/A             |
| 21509   | 0.02 (1.952)  | 0.952 (41.662)  | N/A              | 0.072 (0.936)    | N/A             |
| 22510   | 0.056 (2.777) | -0.019 (-0.642) | 0.885 (23.107)   | 1 (32.799)       | N/A             |
| 22809   | 0.003 (3.608) | 1.948 (78.347)  | -0.955 (-39.025) | -1 (-58.257)     | N/A             |
| 26561   | 0.005 (2.871) | 1.921 (52.278)  | -0.93 (-26.771)  | -0.903 (-18.342) | N/A             |
| 28977   | 0.036 (4.001) | 0.026 (1.319)   | 0.887 (50.766)   | 1 (111.656)      | N/A             |
| 44981   | 0.004 (1.821) | 1.93 (51.422)   | -0.938 (-26.546) | -0.935 (-17.952) | N/A             |
| 46254   | 0.051 (2.721) | 0.91 (30.029)   | N/A              | 0.254 (2.587)    | N/A             |
| 49063   | 0.024 (1.677) | 0.945 (28.458)  | N/A              | 0.187 (1.497)    | N/A             |
| 49232   | 0.043 (2.654) | 0.909 (25.848)  | N/A              | 0.006 (0.081)    | N/A             |
| 49435   | 0.001 (1.982) | 1.956 (100.281) | -0.958 (-50.44)  | -1 (-59.297)     | N/A             |
| 50327   | 0.014 (2.135) | 0.965 (75.59)   | N/A              | 0.065 (1.302)    | N/A             |
| 51324   | 0.02 (3.53)   | 0.958 (88.708)  | N/A              | 0.048 (1.443)    | N/A             |
| 52165   | 0.002 (2.462) | 1.836 (30.362)  | -0.843 (-14.487) | -0.84 (-12.46)   | N/A             |
| 52950   | 0.007 (3.232) | 1.854 (48.092)  | -0.866 (-24.311) | -1 (-19.646)     | N/A             |
| 53795   | 0.022 (1.8)   | 0.13 (1.459)    | 0.77 (8.309)     | 0.925 (16.03)    | N/A             |
| 55106   | 0.096 (1.953) | 0.861 (12.26)   | N/A              | 0.195 (1.471)    | N/A             |
| 55830   | 0.013 (2.056) | 1.805 (25.965)  | -0.828 (-13.452) | -0.806 (-8.793)  | 0.045 (0.561)   |
| 60195   | 0.003 (1.234) | 1.901 (41.652)  | -0.907 (-21.627) | -1 (-13.673)     | N/A             |
| 60639   | 0.019 (0.716) | 0.968 (18.644)  | N/A              | -0.106 (-0.581)  | N/A             |
| 63798   | 0.058 (2.244) | 0.9 (20.731)    | N/A              | 0.195 (2.666)    | N/A             |
| 66207   | 0.009 (0.71)  | 0.986 (38.579)  | N/A              | -0.03 (-0.205)   | N/A             |
| 66215   | 0.017 (1.088) | 0.961 (30.262)  | N/A              | 0.029 (0.316)    | N/A             |
| 66287   | 0.023 (3.264) | 0.961 (85.626)  | N/A              | -0.039 (-0.988)  | N/A             |

| Tour ID | Constant        | AR[1]          | AR[2]            | MA[1]           | MA[2]           |
|---------|-----------------|----------------|------------------|-----------------|-----------------|
| 66865   | 0.006 (1.059)   | 0.973 (54.452) | N/A              | 0.033 (0.562)   | N/A             |
| 69925   | 0.017 (0.631)   | 0.986 (28.778) | N/A              | 0.088 (0.853)   | 0.345 (3.953)   |
| 71821   | 0.036 (2.297)   | 0.889 (18.336) | N/A              | 0.038 (0.406)   | 0.289 (3.073)   |
| 72202   | 0.014 (1.892)   | 0.932 (28.831) | N/A              | 0.125 (1.494)   | N/A             |
| 72532   | 0.017 (2.356)   | 0.951 (50.621) | N/A              | -0.019 (-0.26)  | N/A             |
| 72603   | 0.005 (0.629)   | 1.888 (24.351) | -0.896 (-13.071) | -1 (-7.721)     | N/A             |
| 72723   | 0.013 (2.62)    | 0.036 (1.651)  | 0.912 (45.414)   | 0.98 (83.445)   | N/A             |
| 72869   | 0.067 (2.796)   | 0.876 (20.227) | N/A              | 0.135 (1.776)   | N/A             |
| 73163   | 0.015 (1.845)   | 0.969 (73.475) | N/A              | 0.096 (1.968)   | N/A             |
| 73186   | 0.017 (1.779)   | 0.969 (62.752) | N/A              | 0.048 (0.799)   | N/A             |
| 74983   | 0.022 (1.112)   | 0.059 (1.535)  | 0.884 (16.824)   | 1 (39.133)      | N/A             |
| 78546   | 0.009 (3.933)   | 1.917 (67.963) | -0.927 (-34.842) | -1 (-36.853)    | N/A             |
| 79499   | 0.229 (3.998)   | 0.58 (5.533)   | N/A              | 0.544 (12.077)  | 0.93 (18.499)   |
| 79769   | 0.044 (2.61)    | 0.897 (23.638) | N/A              | -0.017 (-0.173) | N/A             |
| 83878   | 0.021 (1.48)    | 0.964 (50.494) | N/A              | 0.168 (2.694)   | N/A             |
| 84052   | 0.041 (3.374)   | 0.162 (1.304)  | 0.746 (6.304)    | 0.868 (6.942)   | 0.128 (3.178)   |
| 93877   | 0.017 (1.292)   | 0.948 (27.897) | N/A              | -0.012 (-0.123) | N/A             |
| 1605378 | 0.031 (2.62)    | 0.94 (44.506)  | N/A              | -0.017 (-0.301) | N/A             |
| 1605628 | -0.002 (-0.137) | 0.996 (32.839) | N/A              | -0.15 (-1.117)  | N/A             |
| 1607268 | 0.037 (2.74)    | 0.946 (48.19)  | N/A              | -0.037 (-0.556) | N/A             |
| 1608443 | 0.019 (1.218)   | 0.949 (26.621) | N/A              | 0.173 (1.882)   | N/A             |
| 1609587 | 0.041 (2.526)   | 0.924 (32.163) | N/A              | 0.029 (0.335)   | N/A             |
| 1612648 | 0.014 (1.255)   | 0.956 (41.808) | N/A              | 0.146 (2.668)   | N/A             |
| 1614660 | 0.034 (0.884)   | 0.895 (8.295)  | N/A              | 0.271 (2.523)   | N/A             |
| 1617321 | 0.027 (1.851)   | 0.933 (29.147) | N/A              | 0.113 (1.523)   | N/A             |
| 1620855 | 0.033 (2.739)   | 0.945 (51.17)  | N/A              | 0.048 (0.847)   | N/A             |
| 1621632 | 0.022 (3.414)   | 0.955 (80.481) | N/A              | 0.061 (1.474)   | N/A             |
| 1621699 | 0.026 (1.64)    | 0.914 (18.235) | N/A              | 0.069 (0.652)   | N/A             |
| 1623624 | 0.03 (2.475)    | 0.893 (22.95)  | N/A              | 0.303 (3.85)    | N/A             |
| 1624666 | 0.029 (1.377)   | 0.914 (15.991) | N/A              | 0.243 (1.596)   | N/A             |
| 1633110 | 0.005 (3.153)   | 1.961 (97.547) | -0.968 (-46.688) | -1 (-18.63)     | N/A             |
| 85207   | 0.014 (2.133)   | 0.946 (45.237) | N/A              | 0.161 (2.741)   | N/A             |
| 85282   | 0.008 (1.689)   | 0.974 (86.254) | N/A              | 0.104 (2.763)   | N/A             |
| 93804   | 0.029 (2.093)   | 0.923 (27.019) | N/A              | 0.044 (0.736)   | N/A             |
| 60051   | 0.046 (1.625)   | 0.924 (20.392) | N/A              | 0.215 (1.823)   | N/A             |
| 44248   | 0.027 (1.309)   | 0.961 (31.382) | N/A              | 0.041 (0.422)   | N/A             |
| 69982   | 0.034 (1.367)   | 0.942 (20.277) | N/A              | 0.225 (1.927)   | N/A             |
| 76106   | 0.007 (2.248)   | 1.769 (31.23)  | -0.791 (-14.859) | -0.673 (-7.84)  | N/A             |
| 1601410 | 0.045 (1.815)   | 0.891 (15.165) | N/A              | -0.037 (-0.25)  | N/A             |
| 11869   | 0.016 (2.333)   | 0.956 (52.47)  | N/A              | 0.032 (0.63)    | N/A             |
| 78511   | 0.034 (2.029)   | 0.931 (30.125) | N/A              | -0.093 (-1.186) | N/A             |
| 82421   | 0.113 (2.158)   | 0.288 (2.428)  | 0.514 (3.879)    | 1 (13.759)      | N/A             |
| 15618   | 0.182 (2.425)   | 0.233 (2.186)  | 0.399 (3.808)    | 1 (29.657)      | N/A             |
| 36953   | 0.004 (4.791)   | 1.923 (91.202) | -0.936 (-42.106) | -0.818 (-9.479) | -0.182 (-2.048) |
| 66666   | 0.019 (2.431)   | 1.68 (11.08)   | -0.71 (-4.976)   | -0.589 (-3.146) | N/A             |
| 94870   | 0.03 (1.739)    | 0.92 (18.737)  | N/A              | -0.027 (-0.176) | N/A             |
| 91836   | 0.019 (1.066)   | 0.969 (29.462) | N/A              | 0.032 (0.372)   | N/A             |
| 22349   | 0.007 (2.755)   | 1.902 (74.796) | -0.918 (-33.167) | -1 (-12.094)    | N/A             |
| 83648   | 0.026 (1.96)    | 0.94 (33.6)    | N/A              | 0.209 (3.19)    | N/A             |
| 44983   | 0.002 (3.71)    | 1.955 (84.293) | -0.959 (-42.178) | -1 (-41.506)    | N/A             |
| 71801   | 0.005 (1.462)   | 1.867 (28.054) | -0.883 (-15.13)  | -0.904 (-9.668) | N/A             |
| 58776   | 0.03 (1.214)    | 0.924 (16.814) | N/A              | 0.14 (0.992)    | N/A             |
| 74359   | 0.096 (1.811)   | 0.78 (6.49)    | N/A              | 0.001 (0.006)   | N/A             |
| 1603059 | 0.026 (1.353)   | 0.923 (15.839) | N/A              | 0.006 (0.044)   | N/A             |
| 76500   | 0.012 (1.527)   | 0.958 (42.705) | N/A              | -0.088 (-1.189) | N/A             |
| 66306   | 0.002 (0.747)   | 1.827 (35.075) | -0.83 (-16.466)  | -0.766 (-8.151) | -0.234 (-2.478) |
| 1626293 | 0.03 (1.399)    | 0.945 (25.11)  | N/A              | 0.098 (1.005)   | N/A             |
| 1629646 | 0.007 (0.549)   | 0.973 (49.293) | N/A              | -0.049 (-0.481) | N/A             |
| 90928   | 0.009 (1.676)   | 1.828 (16.707) | -0.843 (-8.109)  | -0.756 (-4.897) | N/A             |

Table 6-2: GARCH Estimate for Ctrip Data

| Tour ID | Constant        | GARCH{1}        | ARCH{1}          | Tour ID | Constant        | GARCH{1}        | ARCH{1}         |
|---------|-----------------|-----------------|------------------|---------|-----------------|-----------------|-----------------|
| 5106    | 0.006 (5.160)   | 0.012 (0.152)   | 0.835 (6.878)    | 69925   | 0.0017 (1.1863) | 0.0531 (0.2276) | 0.9469 (2.1162) |
| 72528   | 0.007 (5.017)   | N/A             | 0.818 (4.319)    | 71821   | 0.0007 (3.2921) | N/A             | 1 (3.3277)      |
| 73154   | 0.008 (7.357)   | N/A             | 0.862 (7.465)    | 72202   | 0.0006 (3.1514) | 0.1246 (1.2138) | 0.8308 (3.7012) |
| 80961   | 0.003 (8.564)   | 0.030 (1.301)   | 0.969 (11.318)   | 72532   | 0.0009 (3.6252) | 0.1225 (1.1569) | 0.8208 (3.3828) |
| 29336   | 0.004 (5.135)   | 0.027 (0.475)   | 0.912 (6.118)    | 72603   | 0.0015 (1.5559) | N/A             | 0.9568 (2.607)  |
| 23222   | 0.004 (5.255)   | 0.044 (0.499)   | 0.885 (2.223)    | 72723   | 0.0011 (6.2937) | N/A             | 0.9596 (6.9912) |
| 30938   | 0.006 (6.508)   | N/A             | 0.926 (6.008)    | 72869   | 0.0013 (1.7477) | 0.0005 (0.0039) | 0.9043 (1.9989) |
| 71478   | 0.004 (9.755)   | 0.044 (1.136)   | 0.947 (9.200)    | 73163   | 0.0021 (3.3621) | N/A             | 0.9043 (3.0468) |
| 88292   | 0.006 (9.229)   | N/A             | 0.886 (8.406)    | 73186   | 0.0012 (2.8555) | 0.1638 (1.542)  | 0.7954 (2.6794) |
| 1618693 | 0.003 (13.963)  | N/A             | 0.971 (14.744)   | 74983   | 0.0011 (2.0603) | N/A             | 0.9137 (1.6786) |
| 56737   | 0.004 (14.018)  | N/A             | 0.869 (12.676)   | 78546   | 0.0017 (1.6543) | 0.0464 (0.2101) | 0.9536 (2.7679) |
| 71478   | 0.004 (5.285)   | N/A             | 0.913 (4.834)    | 79499   | 0.0038 (1.1013) | N/A             | 0.7536 (1.3415) |
| 49049   | 0.006 (7.563)   | 0.050 (1.623)   | 0.826 (6.893)    | 79769   | 0.0017 (3.1812) | N/A             | 0.8324 (3.048)  |
| 72526   | 0.004 (4.751)   | 0.007 (0.119)   | 0.980 (4.363)    | 83878   | 0.0009 (1.4128) | 0.1759 (1.1241) | 0.8241 (2.4968) |
| 32391   | 0.006 (7.799)   | 0.059 (1.753)   | 0.851 (7.116)    | 84052   | 0.0024 (5.4055) | N/A             | 0.9119 (5.4233) |
| 72527   | 0.002 (4.235)   | 0.077 (0.793)   | 0.923 (4.393)    | 93877   | 0.0014 (1.678)  | 0.0373 (0.1455) | 0.9238 (1.8103) |
| 69278   | 0.005 (4.842)   | 0.036 (0.542)   | 0.799 (5.319)    | 1605378 | 0.0021 (2.7346) | N/A             | 0.8492 (2.6402) |
| 28245   | 0.005 (4.453)   | 0.025 (0.535)   | 0.939 (6.209)    | 1605628 | 0.0009 (1.2774) | N/A             | 1 (2.0255)      |
| 30814   | 0.003 (3.478)   | N/A             | 0.991 (3.572)    | 1607268 | 0.0019 (2.5127) | 0.0603 (0.3925) | 0.884 (3.0703)  |
| 16311   | 0.008 (6.033)   | N/A             | 0.798 (6.977)    | 1608443 | 0.0035 (1.3152) | N/A             | 0.935 (1.937)   |
| 2753    | 0.001 (1.882)   | N/A             | 1.000 (2.313)    | 1609587 | 0.0016 (2.353)  | N/A             | 0.9447 (2.728)  |
| 3150    | 0.002 (1.82)    | N/A             | 0.792 (1.719)    | 1612648 | 0.0001 (0.6483) | N/A             | 1 (6.4531)      |
| 4171    | 0.001 (4.23)    | N/A             | 0.948 (3.838)    | 1614660 | 0.0016 (1.8106) | N/A             | 1 (2.4261)      |
| 5107    | 0.002 (10.2882) | N/A             | 0.9234 (10.1634) | 1617321 | 0.0025 (2.442)  | N/A             | 0.9199 (2.9504) |
| 5452    | 0.0019 (7.0986) | N/A             | 0.9077 (7.8691)  | 1620855 | 0.0033 (3.7142) | N/A             | 0.9126 (3.7206) |
| 5603    | 0.0009 (6.1515) | N/A             | 1 (6.2136)       | 1621632 | 0.0017 (3.8826) | 0.0283 (0.4139) | 0.9378 (5.0486) |
| 6712    | 0.0006 (2.0965) | 0.0297 (0.1961) | 0.9703 (2.0889)  | 1621699 | 0.0005 (2.0757) | 0.2262 (1.9441) | 0.7738 (3.026)  |
| 7297    | 0.0011 (2.3348) | 0.1562 (1.6258) | 0.8438 (2.5729)  | 1623624 | 0.001 (1.8025)  | N/A             | 0.9581 (2.9801) |
| 9474    | 0.0017 (5.156)  | N/A             | 0.8833 (4.6582)  | 1624666 | 0.001 (1.7386)  | N/A             | 1 (2.1344)      |
| 11626   | 0.0022 (1.6381) | N/A             | 0.9377 (1.9449)  | 1633110 | 0.0019 (1.7924) | N/A             | 1 (3.2014)      |
| 12043   | 0.0014 (1.1293) | N/A             | 0.9367 (2.7765)  | 85207   | 0.0007 (2.5508) | 0.0795 (0.6781) | 0.9167 (3.6131) |
| 17184   | 0.0008 (5.3356) | N/A             | 0.995 (5.4798)   | 85282   | 0.0011 (2.8981) | N/A             | 0.9748 (3.0237) |
| 18201   | 0.0019 (2.3706) | 0.0032 (0.0281) | 0.9968 (3.3236)  | 93804   | 0.0008 (1.8116) | 0.0489 (0.3691) | 0.9511 (2.4345) |
| 20131   | 0.0009 (2.5783) | 0.0099 (0.101)  | 0.9901 (3.3902)  | 60051   | 0.0029 (2.45)   | 0.0078 (0.0461) | 0.8301 (1.5357) |
| 21148   | 0.0013 (1.8452) | N/A             | 0.9066 (1.8333)  | 44248   | 0.0015 (0.8866) | 0.0571 (0.1468) | 0.882 (1.2694)  |
| 21509   | 0.0018 (2.5927) | N/A             | 0.9703 (2.4633)  | 69982   | 0.0017 (0.8935) | N/A             | 0.9974 (1.2846) |
| 22510   | 0.0009 (2.4014) | 0.1557 (1.1087) | 0.8443 (3.6561)  | 76106   | 0.0014 (3.2442) | N/A             | 0.9822 (3.9906) |
| 22809   | 0.0018 (2.7544) | N/A             | 0.9741 (2.8198)  | 1601410 | 0.0015 (2.5261) | N/A             | 0.9236 (1.8951) |
| 26561   | 0.0018 (3.7797) | N/A             | 0.9538 (4.0525)  | 11869   | 0.0013 (4.441)  | N/A             | 1 (4.0114)      |
| 28977   | 0.0016 (3.7397) | 0.0309 (0.367)  | 0.9505 (6.3591)  | 78511   | 0.0035 (2.2583) | N/A             | 0.7385 (2.3533) |
| 44981   | 0.0016 (1.8887) | N/A             | 0.9847 (2.8808)  | 82421   | 0.0039 (1.172)  | N/A             | 0.8484 (1.1465) |
| 46254   | 0.0028 (2.8363) | N/A             | 0.8227 (2.3823)  | 15618   | 0.0011 (1.6072) | 0.0559 (0.1982) | 0.9441 (2.1878) |
| 49063   | 0.0016 (1.4502) | N/A             | 0.9766 (2.5992)  | 36953   | 0.0019 (1.5647) | N/A             | 0.924 (1.3806)  |
| 49232   | 0.0014 (2.7849) | 0.0329 (0.2037) | 0.8994 (3.4561)  | 66666   | 0.0028 (3.1064) | N/A             | 0.9284 (3.1295) |
| 49435   | 0.0013 (1.9412) | N/A             | 0.9456 (2.4738)  | 94870   | 0.001 (1.3454)  | N/A             | 0.9452 (1.6202) |
| 50327   | 0.0021 (3.9601) | N/A             | 0.9469 (3.6537)  | 91836   | 0.0013 (2.3764) | N/A             | 1 (3.7621)      |
| 51324   | 0.0027 (5.9723) | 0.0316 (0.5494) | 0.8799 (5.1756)  | 22349   | 0.0012 (1.0835) | N/A             | 0.9609 (1.1298) |
| 52165   | 0.0016 (8.7276) | N/A             | 0.922 (10.136)   | 83648   | 0.0014 (2.2177) | N/A             | 0.9839 (2.7102) |
| 52950   | 0.0019 (2.6109) | N/A             | 1 (3.2394)       | 44983   | 0.001 (1.7763)  | N/A             | 0.9906 (2.2808) |
| 53795   | 0.001 (3.9234)  | N/A             | 0.9577 (3.0225)  | 71801   | 0.001 (5.8558)  | N/A             | 0.9402 (3.9024) |
| 55106   | 0.0015 (1.0498) | 0.0247 (0.0737) | 0.7127 (1.0407)  | 58776   | 0.0019 (1.4994) | N/A             | 0.9524 (1.7148) |
| 55830   | 0.0023 (2.7369) | N/A             | 0.9053 (2.5917)  | 74359   | 0.0015 (0.9503) | N/A             | 0.5003 (1.4076) |
| 60195   | 0.0018 (1.3274) | N/A             | 0.9645 (2.4051)  | 1603059 | 0.0011 (3.1878) | N/A             | 1 (2.986)       |
| 60639   | 0.0005 (2.7896) | N/A             | 1 (4.0139)       | 76500   | 0.0008 (1.5869) | 0.1829 (0.9449) | 0.7943 (2.0277) |
| 63798   | 0.0021 (1.7739) | 0.0837 (0.372)  | 0.7645 (2.1159)  | 66306   | 0.0018 (2.4888) | N/A             | 0.9505 (2.3495) |
| 66207   | 0.0003 (0.5155) | 0.2565 (0.6184) | 0.7435 (0.8259)  | 1626293 | 0.0017 (1.4162) | N/A             | 0.9786 (1.6179) |
| 66215   | 0.0013 (2.2661) | N/A             | 1 (2.1052)       | 1629646 | 0.0007 (2.1847) | 0.0292 (0.1469) | 0.9708 (3.2737) |
| 66287   | 0.0031 (4.9058) | N/A             | 0.9106 (4.3512)  | 90928   | 0.0016 (2.4831) | N/A             | 1 (3.5633)      |
| 66865   | 0.0004 (6.9002) | N/A             | 1 (4.1362)       |         |                 |                 |                 |

## References

- Liu, B. 2015. *Sentiment Analysis: Mining Opinions, Sentiments, and Emotions*. Cambridge University Press.
- Manning, C. D., P. Raghavan, H. Schütze. 2008. Scoring, term weighting, and the vector space model. *Introduction to Information Retrieval*. Cambridge University Press.
- Wang, Y., A. Chaudhry. 2018. When and how managers' responses to online reviews affect subsequent reviews. *Journal of Marketing Research* 55(2) 163–177.
